1 **Title:** Precisely-timed dopamine signals establish distinct kinematic representations of  
2 skilled movements

3

4

5 **Running Head:** Dopamine signals establish distinct motor skill kinematics

6

7

8 **Authors:**

9

10 Alexandra **Bova**<sup>1</sup>, Matt **Gaidica**<sup>1</sup>, Amy **Hurst**<sup>2</sup>, Yoshiko **Iwai**<sup>2</sup>, & Daniel K.  
11 **Leventhal**<sup>2,3,4,5\*</sup>

12

13 **Affiliations:**

14

15 <sup>1</sup> Neuroscience Graduate Program, University of Michigan, Ann Arbor, Michigan 48109

16 <sup>2</sup> Department of Neurology, University of Michigan, Ann Arbor, Michigan 48109

17 <sup>3</sup> Department of Biomedical Engineering, University of Michigan, Ann Arbor, Michigan  
18 48109

19 <sup>4</sup> Parkinson Disease Foundation Research Center of Excellence, University of Michigan,  
20 Ann Arbor, Michigan 48109

21 <sup>5</sup> Department of Neurology, VA Ann Arbor Health System, Ann Arbor, Michigan 48109

22

23

24

25 \* Corresponding Author:

26 Daniel K. Leventhal

27 Department of Neurology

28 University of Michigan

29 109 Zina Pitcher PI

30 Ann Arbor, MI 48109

31 [dleventh@med.umich.edu](mailto:dleventh@med.umich.edu)

32

33

34 Number of pages: 41

35 Number of figures: 11

36 Number of supplemental figures: 19

37 Number of words Abstract: 149

38 Number of words Introduction: 852

39 Number of words Discussion: 1343

## 40 **Abstract**

41 Brain dopamine is critical for normal motor control, as evidenced by its importance in  
42 Parkinson Disease and related disorders. Current hypotheses are that dopamine  
43 influences motor control by “invigorating” movements and regulating motor learning.  
44 Most evidence for these aspects of dopamine function comes from simple tasks (e.g.,  
45 lever pressing). Therefore, the influence of dopamine on motor skills requiring multi-joint  
46 coordination is unknown. To determine the effects of precisely-timed dopamine  
47 manipulations on the performance of a complex, finely coordinated dexterous skill, we  
48 optogenetically stimulated or inhibited midbrain dopamine neurons as rats performed a  
49 skilled reaching task. We found that reach kinematics and coordination between gross  
50 and fine movements progressively changed with repeated manipulations. However,  
51 once established, rats transitioned abruptly between aberrant and baseline reach  
52 kinematics in a dopamine-dependent manner. These results suggest that precisely-  
53 timed dopamine signals have immediate and long-term influences on motor skill  
54 performance, distinct from simply “invigorating” movement.

## 55 **Introduction**

56 Brain dopamine plays a critical role in motor control. This is most clearly  
57 exemplified by the motor symptoms of Parkinson Disease (PD), in which brain  
58 dopamine levels are reduced. PD is defined by tremor, rigidity, bradykinesia, and  
59 postural instability, which (mostly) respond to dopamine replacement therapy. However,  
60 PD patients also experience significant disability from impaired manual dexterity, which  
61 causes difficulty with tasks like tying shoelaces, fastening buttons, and handwriting  
62 (Pohar & Allyson Jones, 2009). This symptom is distinct from bradykinesia (Foki et al.,

63 2016), but also responds to dopamine replacement (Gebhardt et al., 2008, Lee et al.,  
64 2018). Thus, dopamine plays an important, but poorly defined, role in dexterous skill  
65 beyond simply regulating movement speed or amplitude.

66 Two leading hypotheses regarding the role of dopamine in motor control are that  
67 it “invigorates” movement and regulates motor learning. The “vigor” hypothesis derives  
68 from the exquisite dopa-responsiveness of bradykinesia in PD, and is supported by  
69 extensive experimental evidence. Intrastratial infusion of dopamine agonists increases  
70 locomotion, and both electrical and optogenetic stimulation of midbrain dopamine  
71 neurons cause contraversive turning (Arbuthnott & Ungerstedt, 1975, Saunders et al.,  
72 2018). Dopamine signaling increases near movement onset and acceleration bouts  
73 (Coddington & Dudman, 2018, Howe & Dombeck, 2016, Jin & Costa, 2010, Schultz et  
74 al., 1983), and is correlated with movement velocity (Barter et al., 2015, Saunders et al.,  
75 2018). Conversely, dopamine depletion and dopamine receptor blockade slow  
76 movement (Leventhal et al., 2014, Panigrahi et al., 2015). These studies used scalar  
77 readouts that reflect “vigor” (e.g., movement velocity or numbers of rotations), and  
78 therefore could not assess dopaminergic influences on multi-joint coordination.

79 Dopaminergic roles in reinforcement learning may contribute to “non-vigor”  
80 aspects of motor control. Phasic dopamine release patterns are broadly consistent with  
81 “reward prediction error” (RPE) signals, or the difference in value between anticipated  
82 and realized behavioral states (Glimcher, 2011). In reinforcement learning models, the  
83 RPE is used to adjust subsequent behavior. While the details of dopamine’s role in  
84 implicit learning remain to be fully elucidated (Schultz, 2019), dopamine signaling clearly  
85 influences synaptic plasticity and alters future behavior (Dowd & Dunnett, 2005,

86 Leventhal et al., 2014, Mohebi et al., 2019, Parker et al., 2016, Shen et al., 2008). Most  
87 evidence for “learning” models of dopamine function come from behavioral tasks that  
88 require no movement (e.g., classical conditioning, Tobler et al., 2005), simple  
89 movements (e.g., lever presses, Parker et al., 2016), or innate movements (e.g.,  
90 locomotion, Howe & Dombeck, 2016). For the most part, such tasks have discrete  
91 outcomes (e.g., push the right or left lever, initiate locomotion or not). However,  
92 dopaminergic roles in instrumental and classical conditioning may extend to tasks with  
93 more degrees of freedom. In support of this hypothesis, dopamine neuron firing patterns  
94 consistent with RPEs (more accurately, performance prediction errors) are observed in  
95 songbirds receiving distorted audio feedback (Gadagkar et al., 2016). In mice, rotarod  
96 performance worsens gradually during dopamine receptor blockade, and improves  
97 gradually when the blockade is released (Beeler et al., 2012). These results could be  
98 explained by dopamine reinforcing specific, successful actions (e.g., paw adjustments  
99 on the rotarod) to gradually improve performance (Beeler et al., 2013). Nonetheless, the  
100 role of dopamine in skilled, dexterous movements requiring precise multi-joint  
101 coordination remains unclear.

102         The goal of this study was to determine the effects of precisely-timed  
103 dopaminergic manipulations on a complex, finely coordinated, and relatively  
104 unconstrained motor skill. To do this, we optogenetically stimulated or inhibited midbrain  
105 dopamine neurons as rats performed a skilled reaching task. In skilled reaching, rats  
106 learn the coordinated forelimb and digit movements to reach for, grasp, and consume  
107 sugar pellets. Skilled reaching is readily learned by rats over several sessions (Klein et  
108 al., 2012, Lemke et al., 2019), requires precise coordination between the forelimb and



109 digits, and is sensitive to dopamine depletion (Hyland et al., 2019, Whishaw et al.,  
110 1986). It is therefore an excellent model for assessing dopaminergic contributions to  
111 dexterous skill.

112 By combining skilled reaching, optogenetics, and measurement of 3-dimensional  
113 paw/digit kinematics, we addressed the following questions. First, we asked whether  
114 dopamine manipulations affect current or subsequent reaches. If dopamine affects only  
115 the current movement, reach kinematics should change immediately with dopamine  
116 manipulations. Conversely, if dopamine provides a teaching signal for fine motor  
117 coordination, reach kinematics should depend on the history of prior dopaminergic  
118 activation. Second, we asked how reach kinematics – specifically coordination between  
119 forelimb and digit movements – are influenced by dopamine manipulations. If dopamine  
120 plays a purely “invigorating” role in movement, altered dopaminergic signaling should  
121 affect only the velocity or amplitude of the reaches.

122 Instead of pure vigor or learning roles for dopamine, we found a complex pattern  
123 of dopaminergic influences on skilled reaching. Consistent with a motor learning  
124 function, reach kinematics changed gradually with repeated dopamine neuron  
125 stimulation or inhibition. In addition to simple kinematic measures (e.g., reach  
126 amplitude), coordination between paw advancement and digit movements also changed  
127 with repeated stimulation/inhibition. However, once established, rats transitioned  
128 between aberrant and baseline reach kinematics within a single trial in a dopamine-  
129 dependent manner. These results indicate that dopamine has both immediate and long-  
130 term effects on motor control beyond simply invigorating movement, with important  
131 implications for understanding dopamine-linked movement disorders.

## 132 **Results**

133 We optogenetically stimulated or inhibited substantia nigra pars compacta (SNc)  
134 dopamine neurons at specific moments during rat skilled reaching. Tyrosine  
135 hydroxylase (TH)-Cre<sup>+</sup> rats were injected bilaterally with a double-floxed  
136 channelrhodopsin (ChR2), archaerhodopsin (Arch), or control EYFP construct into SNc  
137 (Figures 1A, 1C, and 1E). Rats were trained on an automated skilled reaching task that  
138 allows synchronization of high-speed video with optogenetics (Figure 1D, Bova et al.,  
139 2019, Ellens et al., 2016). Following training, optical fibers were implanted over SNc  
140 contralateral to the rat's preferred reaching paw. Immunohistochemistry confirmed that  
141 opsin expression was restricted to TH-expressing neurons in SNc projecting to striatum  
142 (Figure 1F and Figure 1 – figure supplement 1).

143

### 144 **Altered SNc dopamine neuron activity gradually changes skilled reaching**

#### 145 **outcomes**

146 We stimulated or inhibited SNc dopamine neurons during every reach for ten 30-  
147 minute sessions (Figure 1D, “during reach”). Baseline performance did not differ  
148 between groups (Figure 2A, D). Dopamine neuron stimulation did not affect the number  
149 of reaches performed (Figure 2B), but caused a progressive decline in reach success  
150 (Figure 2E). Reach success rate decreased to about half of baseline performance  
151 during the first day of testing, then to nearly 0% for the remainder of “Laser On”  
152 sessions. This progressive decline in performance led us to ask whether success rate  
153 also changed across trials within individual sessions. Indeed, during the first “Laser On”  
154 session, success rate progressively declined (Figure 2G, Figure 2 - figure supplement

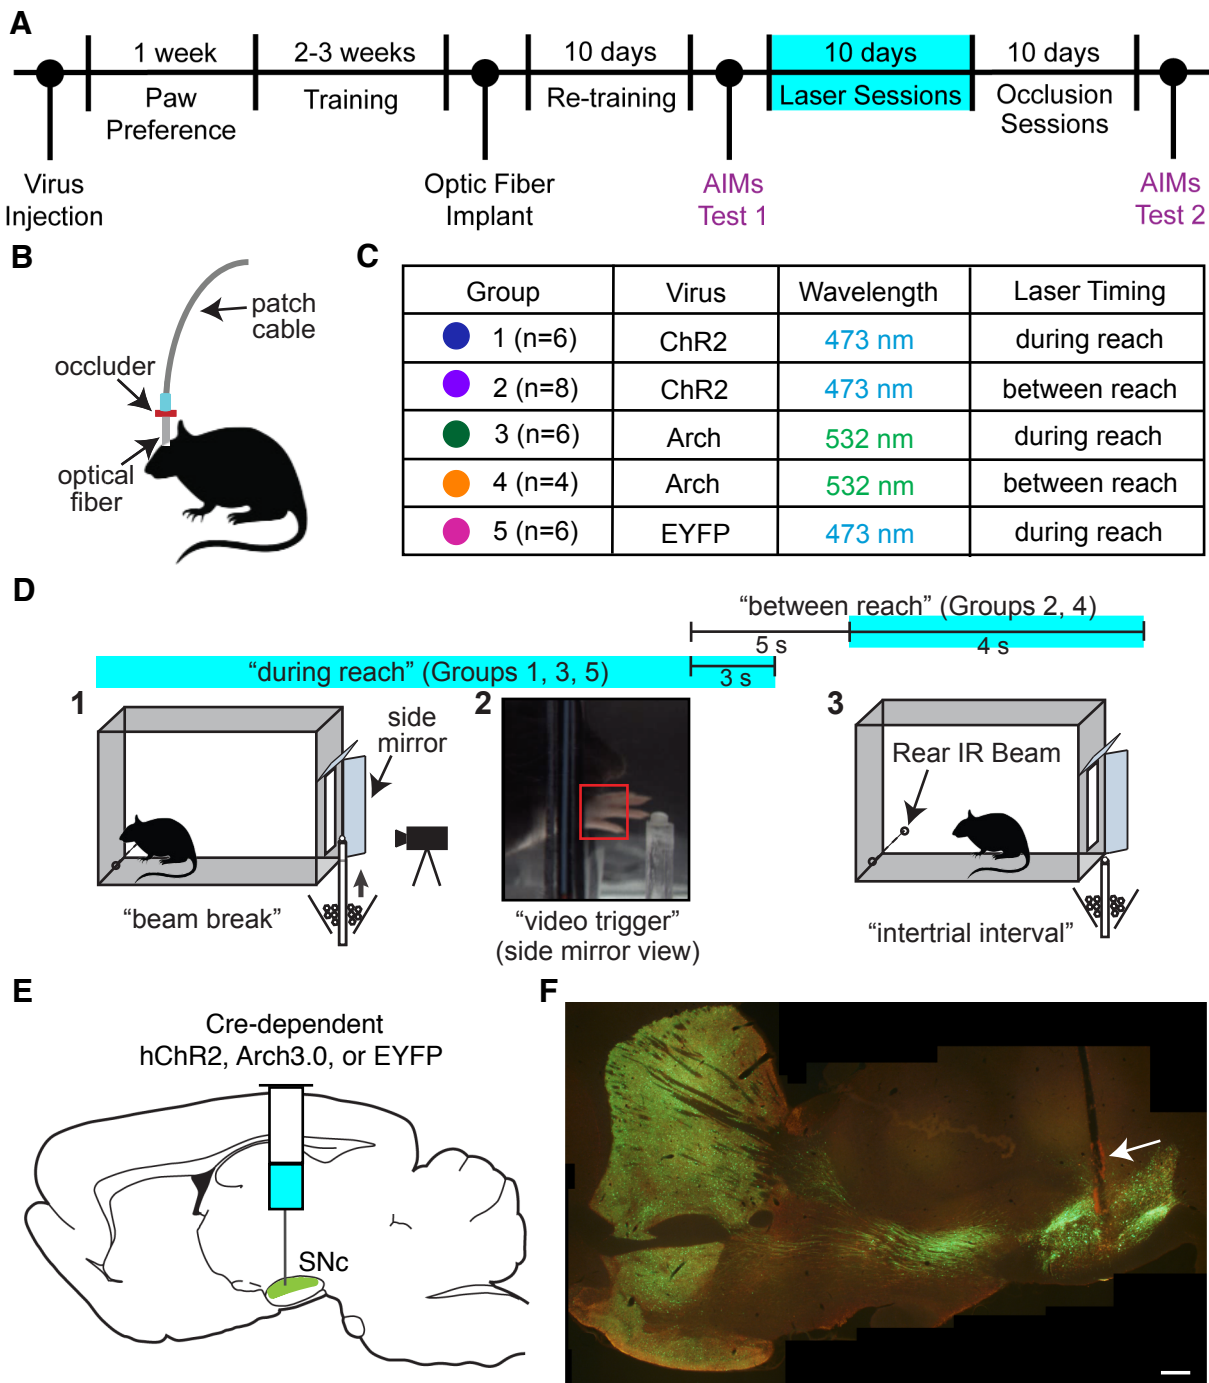

**Figure 1.** Experimental framework. **(A)** Timeline for a single experiment. AIMs Test – Abnormal Involuntary Movement testing (see “Dopamine neuron stimulation induces context- and history-dependent abnormal involuntary movements”). **(B)** Light was physically occluded from entering the brain by obstructing the connection between the optical fiber and patch cable during “occlusion” sessions. **(C)** Rats were assigned to one of five groups based on virus injected and timing of optogenetic manipulation. *n* is the number of rats included in the analysis for each group (see Materials and Methods). Dot colors correspond with the color used to represent each group in subsequent figures. **(D)** A single skilled reaching trial. 1 – rat breaks IR beam at the back of the chamber to request a sugar pellet (“beam break”). 2 – Real-time analysis detects the paw breaching the reaching slot to trigger 300 fps video from 1 s before to 3.33 s after the trigger event (“video trigger”). 3 – 2 s after the trigger event, the pellet delivery rod resets and the rat can initiate a new trial (“intertrial interval”). Optogenetic manipulations occurred either during reaching (beam break to 3 s after “video trigger”) or between reaches (beginning 5 s after “video trigger” and lasting 4 s). **(E)** Double-floxed ChR2-EYFP, Arch-EYFP, or control EYFP constructs were injected bilaterally into SNc. **(F)** Immunohistochemistry against EYFP showing expression of a fused ChR2-EYFP construct in the nigrostriatal pathway. Optical fibers (arrow) were implanted over SNc contralateral to the rat’s preferred reaching paw. Estimated locations of all fiber tips are shown in Figure 1 – figure supplement 1. Scale bar = 1 mm.

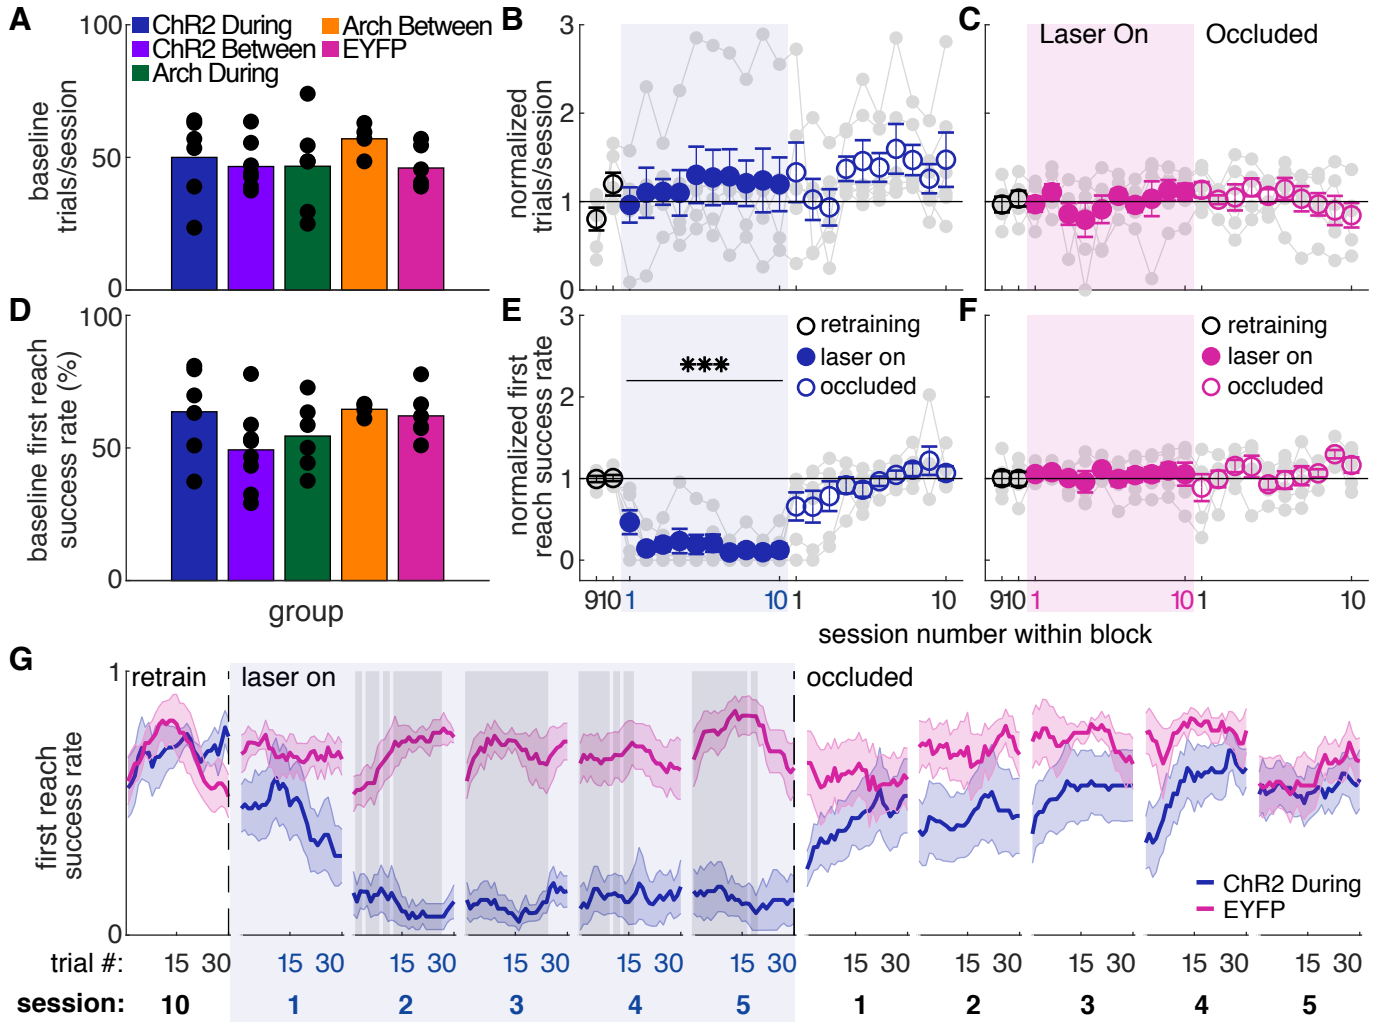

155 1). Furthermore, dopamine-dependent changes in reach success persisted into  
156 subsequent sessions. Therefore, reaching performance is dependent on the history of  
157 dopamine neuron activation during skilled reaching.

158 Because dopamine stimulation during reaching caused a gradual decline in  
159 performance, we asked if reaching performance would recover gradually when  
160 dopamine stimulation was removed. Animals were tested for an additional 10 days with  
161 the same laser stimulation protocol, but with the patch cable-optical fiber junction  
162 physically occluded (“occlusion” sessions, Figure 1B). Thus, all cues were identical  
163 (e.g., optical shutter noise, visible light) except light penetration into the brain. Reaching  
164 performance recovered quickly, but not immediately, to pre-stimulation levels (Figure  
165 2E, G). However, there was significant variability between rats in the rate of recovery  
166 (Figure 2 – figure supplement 1). On average, recovery to baseline performance was  
167 faster than the decline in performance with initial dopamine stimulation (contrast testing,  
168  $t(583.8) = 2.55$ ,  $P = 0.011$ ). This is further evidence that the history of dopaminergic  
169 activation influences subsequent skill execution.

170 We next asked if dopamine stimulation must occur during reaches to affect  
171 success rate. A separate group of ChR2-expressing TH-Cre<sup>+</sup> rats received laser  
172 stimulation during the intertrial interval for a duration matched to “during reach”  
173 stimulation (Figure 1D, “between reach”). Dopamine neuron stimulation between  
174 reaches had no effect on number of reaches (Figure 3A) or success rate (Figures 3B, C  
175 and Figure 3 – figure supplement 1). Therefore, dopamine neuron stimulation must  
176 occur as the rat is reaching to affect subsequent reaching performance. This result has  
177 two important implications. First, it suggests that skill performance depends on the

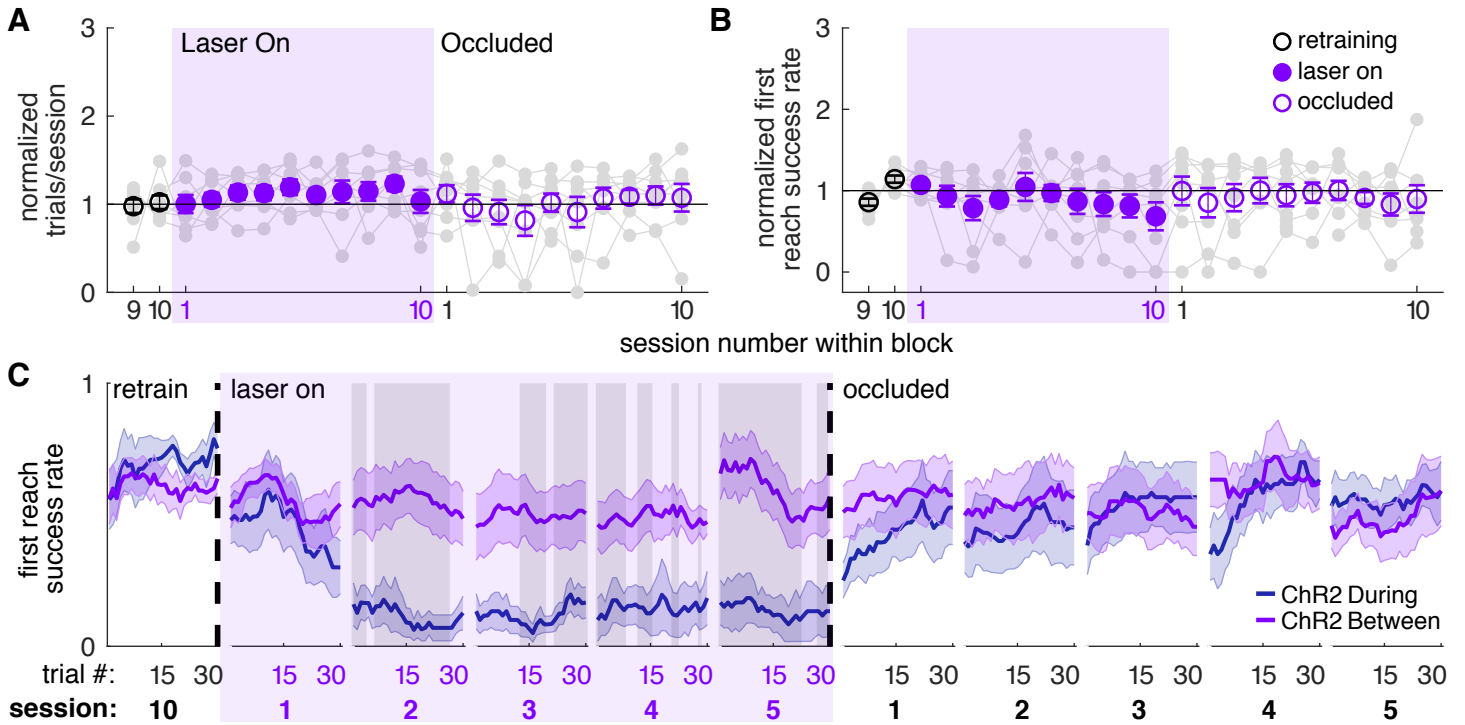

**Figure 3.** Dopamine neuron stimulation between reaches does not affect skilled reaching performance. **(A)** Average number of trials per session divided by the baseline number of trials for “between reach” stimulation. Grey lines represent individual rats. Linear mixed model: effect of laser:  $t(79) = 1.13$ ,  $P = 0.26$ ; interaction between laser and session:  $t(584) = -0.64$ ,  $P = 0.52$ . **(B)** Average first attempt success rate divided by baseline success rate for “between reach” stimulation. Linear mixed model: effect of laser:  $t(133) = -0.29$ ,  $P = 0.78$ ; interaction between laser and session:  $t(584) = -0.94$ ,  $P = 0.35$ . **(C)** Moving average of success rate within individual sessions in the last retraining session, first 5 “laser on” sessions, and first 5 “occlusion” sessions. “During reach” data from Figure 2 are shown for comparison. Shaded grey areas represent trials with a statistically significant difference between groups (Wilcoxon rank sum test,  $P < 0.01$ ). Data for individual rats are shown in Figure 3 – figure supplement 1. Shaded colored areas in C and error bars in A-B represent s.e.m.



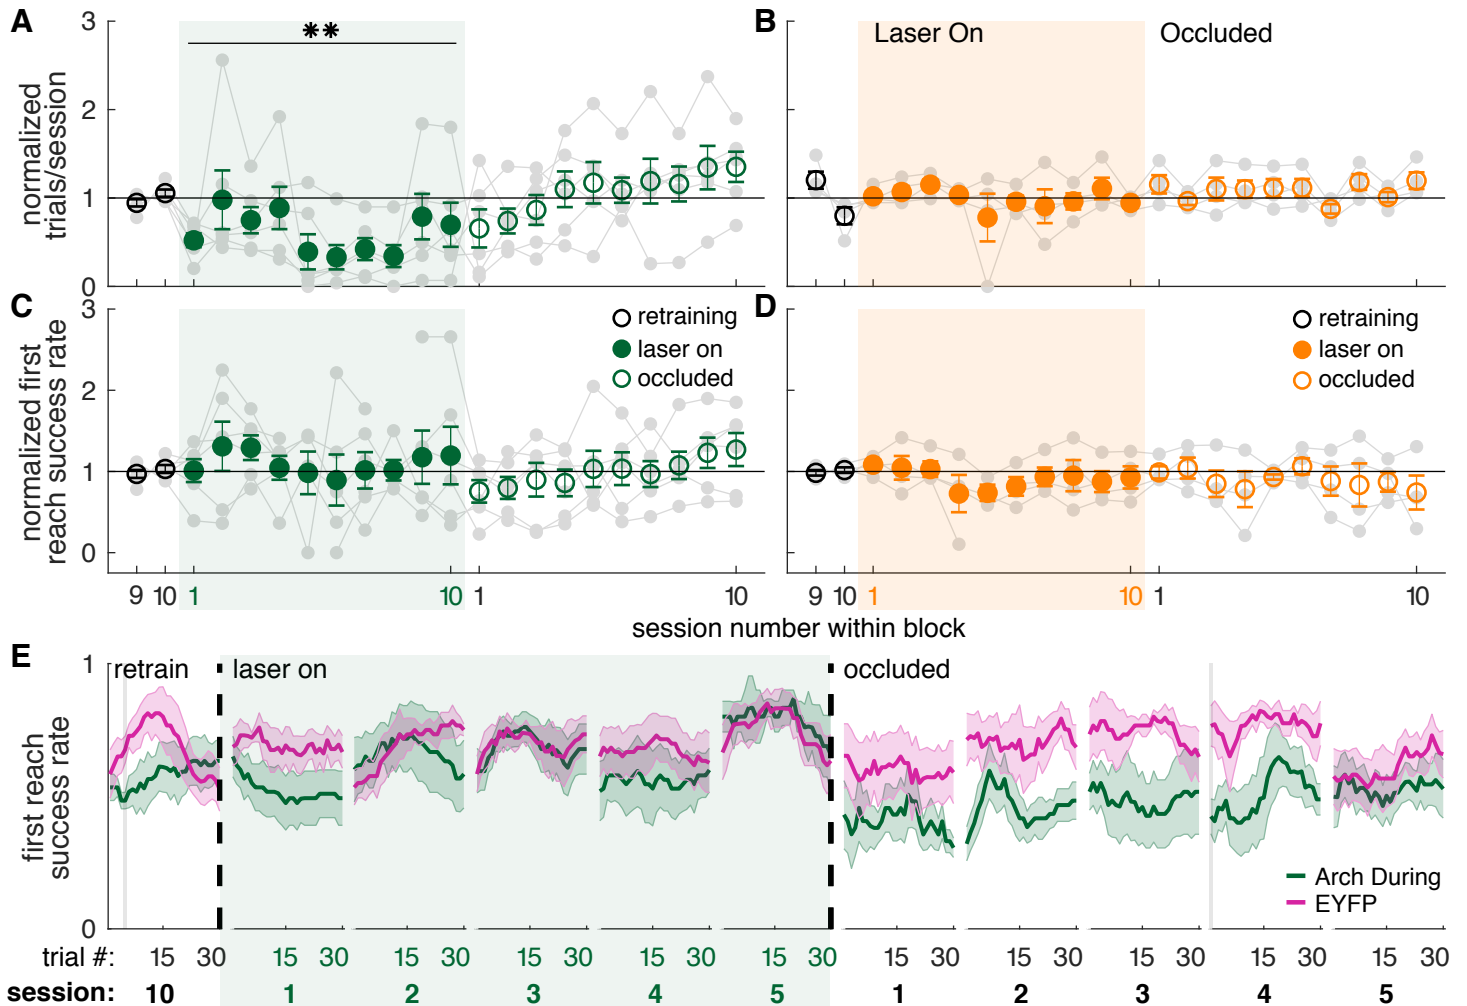

**Figure 4.** Dopamine neuron inhibition during reaches decreases the number of reaches performed but does not impair reach accuracy. **(A)** Average number of trials per session divided by the baseline number of trials for “during reach” inhibition. Grey lines represent individual rats. Linear mixed model: effect of laser:  $t(80) = -0.21$ ,  $P = 0.84$ ; interaction between laser and session:  $t(584) = -2.64$ ,  $P = 8.47 \times 10^{-3}$ . **(B)** Same as (A) for “between reach” inhibition. Linear mixed model: effect of laser:  $t(80) = 0.93$ ,  $P = 0.36$ ; interaction between laser and session:  $t(584) = -1.52$ ,  $P = 0.13$ . **(C)** Average first attempt success rate divided by baseline success rate for “during reach” inhibition. Linear mixed model: effect of laser:  $t(133) = 0.59$ ,  $P = 0.56$ ; interaction between laser and session:  $t(584) = -0.40$ ,  $P = 0.69$ . **(D)** Same as (C) for “between reach” inhibition. Linear mixed model: effect of laser:  $t(133) = -0.64$ ,  $P = 0.52$ ; interaction between laser and session:  $t(584) = 0.10$ ,  $P = 0.92$ . **(E)** Moving average of success rate across trials within individual sessions in the last retraining session, first 5 “laser on” sessions, and first 5 “occlusion” sessions. Shaded grey areas represent trials with a statistically significant difference between groups (Wilcoxon rank sum test,  $P < 0.01$ ). Shaded colored areas in (E) and error bars in A-D represent s.e.m. Moving average of success rate within sessions for Arch Between rats is shown in Figure 4 – figure supplement 1. Data for individual Arch During and Arch Between rats are shown in Figure 4 – figure supplement 2. \*\* indicates  $p < 0.01$  for the laser-session interaction term in panel A.

178 history of striatal dopamine levels specifically during performance of that skill. Second, it  
179 argues against the possibility that the effects of dopamine neuron stimulation are due to  
180 the gradual accumulation of striatal dopamine.

181 Dopamine neuron inhibition during reaching did not affect success rate (Figures  
182 4C, E and Figure 4 – figure supplement 2). However, dopamine neuron inhibition  
183 significantly decreased the number of reaches per session (Figure 4A), consistent with  
184 a role for midbrain dopamine in motivation to work for rewards (Palmiter, 2008,  
185 Salamone & Correa, 2012). This effect was also gradual, with rats progressively  
186 performing fewer reaches across sessions. Dopamine neuron inhibition between  
187 reaches had no effect on success rate (Figure 4D and Figure 4 – figure supplement 1)  
188 or the number of reaches performed in each session (Figure 4B). Control rats injected  
189 with constructs expressing EYFP but no opsin did not experience any changes in task  
190 performance (Figures 2C, F, G and Figure 2 – figure supplement 1).

191

## 192 **Dopamine manipulations induce progressive changes in reach-to-grasp** 193 **kinematics**

194 The success rate analysis indicates that repeated dopaminergic stimulation  
195 progressively diminished reaching performance, but does not explain why performance  
196 worsened. To determine which aspects of reach kinematics were altered by  
197 dopaminergic manipulations, we used Deeplabcut to track individual digits, the paw, and  
198 the pellet (Figure 5; Bova et al., 2019, Mathis et al., 2018).

199 Consistent with the success rate analysis, dopamine neuron stimulation during  
200 reaching caused progressive changes in reach-to-grasp kinematics. Reach extent (how



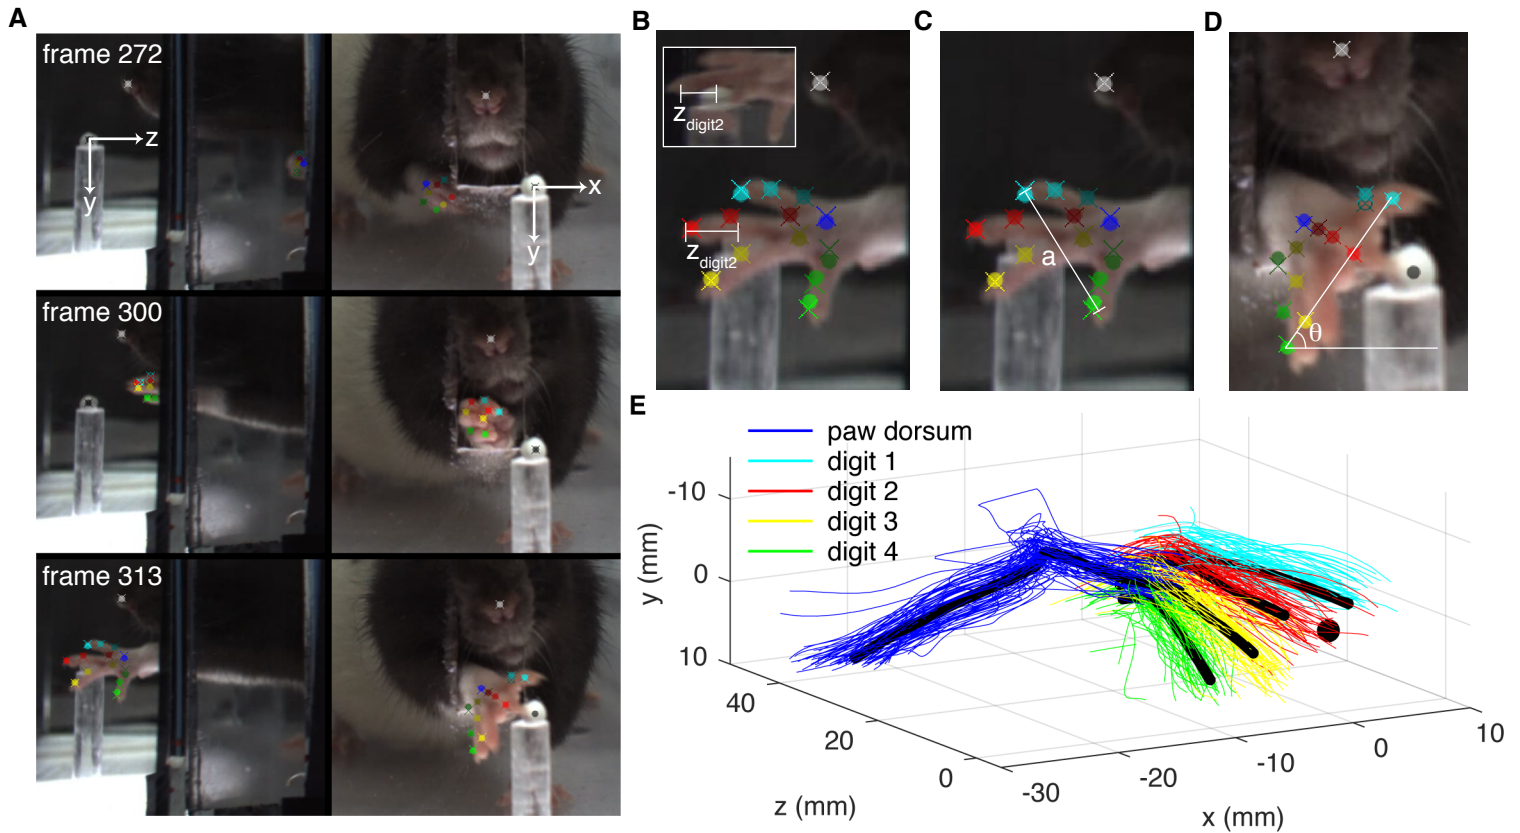

**Figure 5.** Paw and digit tracking with Deeplabcut. **(A)** Deeplabcut identification of digits, paw dorsum, nose, and pellet in individual video frames (side mirror and direct views). X, Y, and Z coordinates are in reference to the pellet. **(B)** Reach extent ( $z_{\text{digit2}}$ ) is the z-coordinate of the tip of the second digit. The end of a reach is defined as the moment  $z_{\text{digit2}}$  begins to increase (the digit tip moves back towards the box). Inset – mirror view of the palmar surface of the paw **(C)** Grasp aperture ( $a$ ) is the Euclidian distance between the first and fourth digit tips. **(D)** Paw orientation is the angle ( $\theta$ ) between a line connecting the first and fourth digit tips and the floor. **(E)** Example 3-dimensional reconstruction of reaching trajectories from a single “retraining” session. Colored lines represent individual trials and black lines represent average trajectories of the paw dorsum and digit tips. Sugar pellet (black dot) is at (0,0,0).

201 far the paw extended in the direction of the pellet,  $z_{\text{digit}2}$ ) became progressively shorter  
202 with repeated stimulation during reaches (Figure 6A, Videos 1 and 2). This progressive  
203 change occurred both across and within sessions, and did not stabilize until the fifth  
204 session of dopamine neuron stimulation (Figure 6D and Figure 6 – figure supplement  
205 2). Dopamine neuron stimulation during reaches also gradually narrowed grasp  
206 aperture at reach end (Figure 6E, F and Figure 6 – figure supplement 3), caused the  
207 paw to be more pronated at reach end (i.e., theta decreased) (Figure 6G, H and Figure  
208 6 – figure supplement 4), and decreased the maximum reach velocity (Figure 6I, J and  
209 Figure 6 – figure supplement 5). Interestingly, kinematic measures continued to change  
210 even when success rate had plateaued (compare Figures 2E and 6). This is due to a  
211 “floor effect” for success rate – once the rat consistently misses the pellet, no further  
212 changes are detectable by this measure. When dopamine stimulation ceased  
213 (“occlusion” sessions), reach-to-grasp kinematics rapidly returned to baseline. As with  
214 success rate, there was individual variability in how quickly rats returned to pre-  
215 stimulation kinematics (Figures 6A, D-J and Figure 6 –figure supplements 2-5). All  
216 reach-to-grasp kinematics were unchanged in rats receiving dopamine neuron  
217 stimulation between reaches and EYFP control rats (Figures 6B-D, F, H, J and Figure 6  
218 –figure supplements 1-5). In addition to histology, we verified opsin expression and fiber  
219 placement by performing “during reach” stimulation in rats previously stimulated  
220 between reaches. All rats showed kinematic changes with “during reach” stimulation not  
221 observed with “between reach” stimulation. This served as a positive control and  
222 reinforces the importance of the timing of dopamine neuron stimulation with respect to  
223 specific actions.

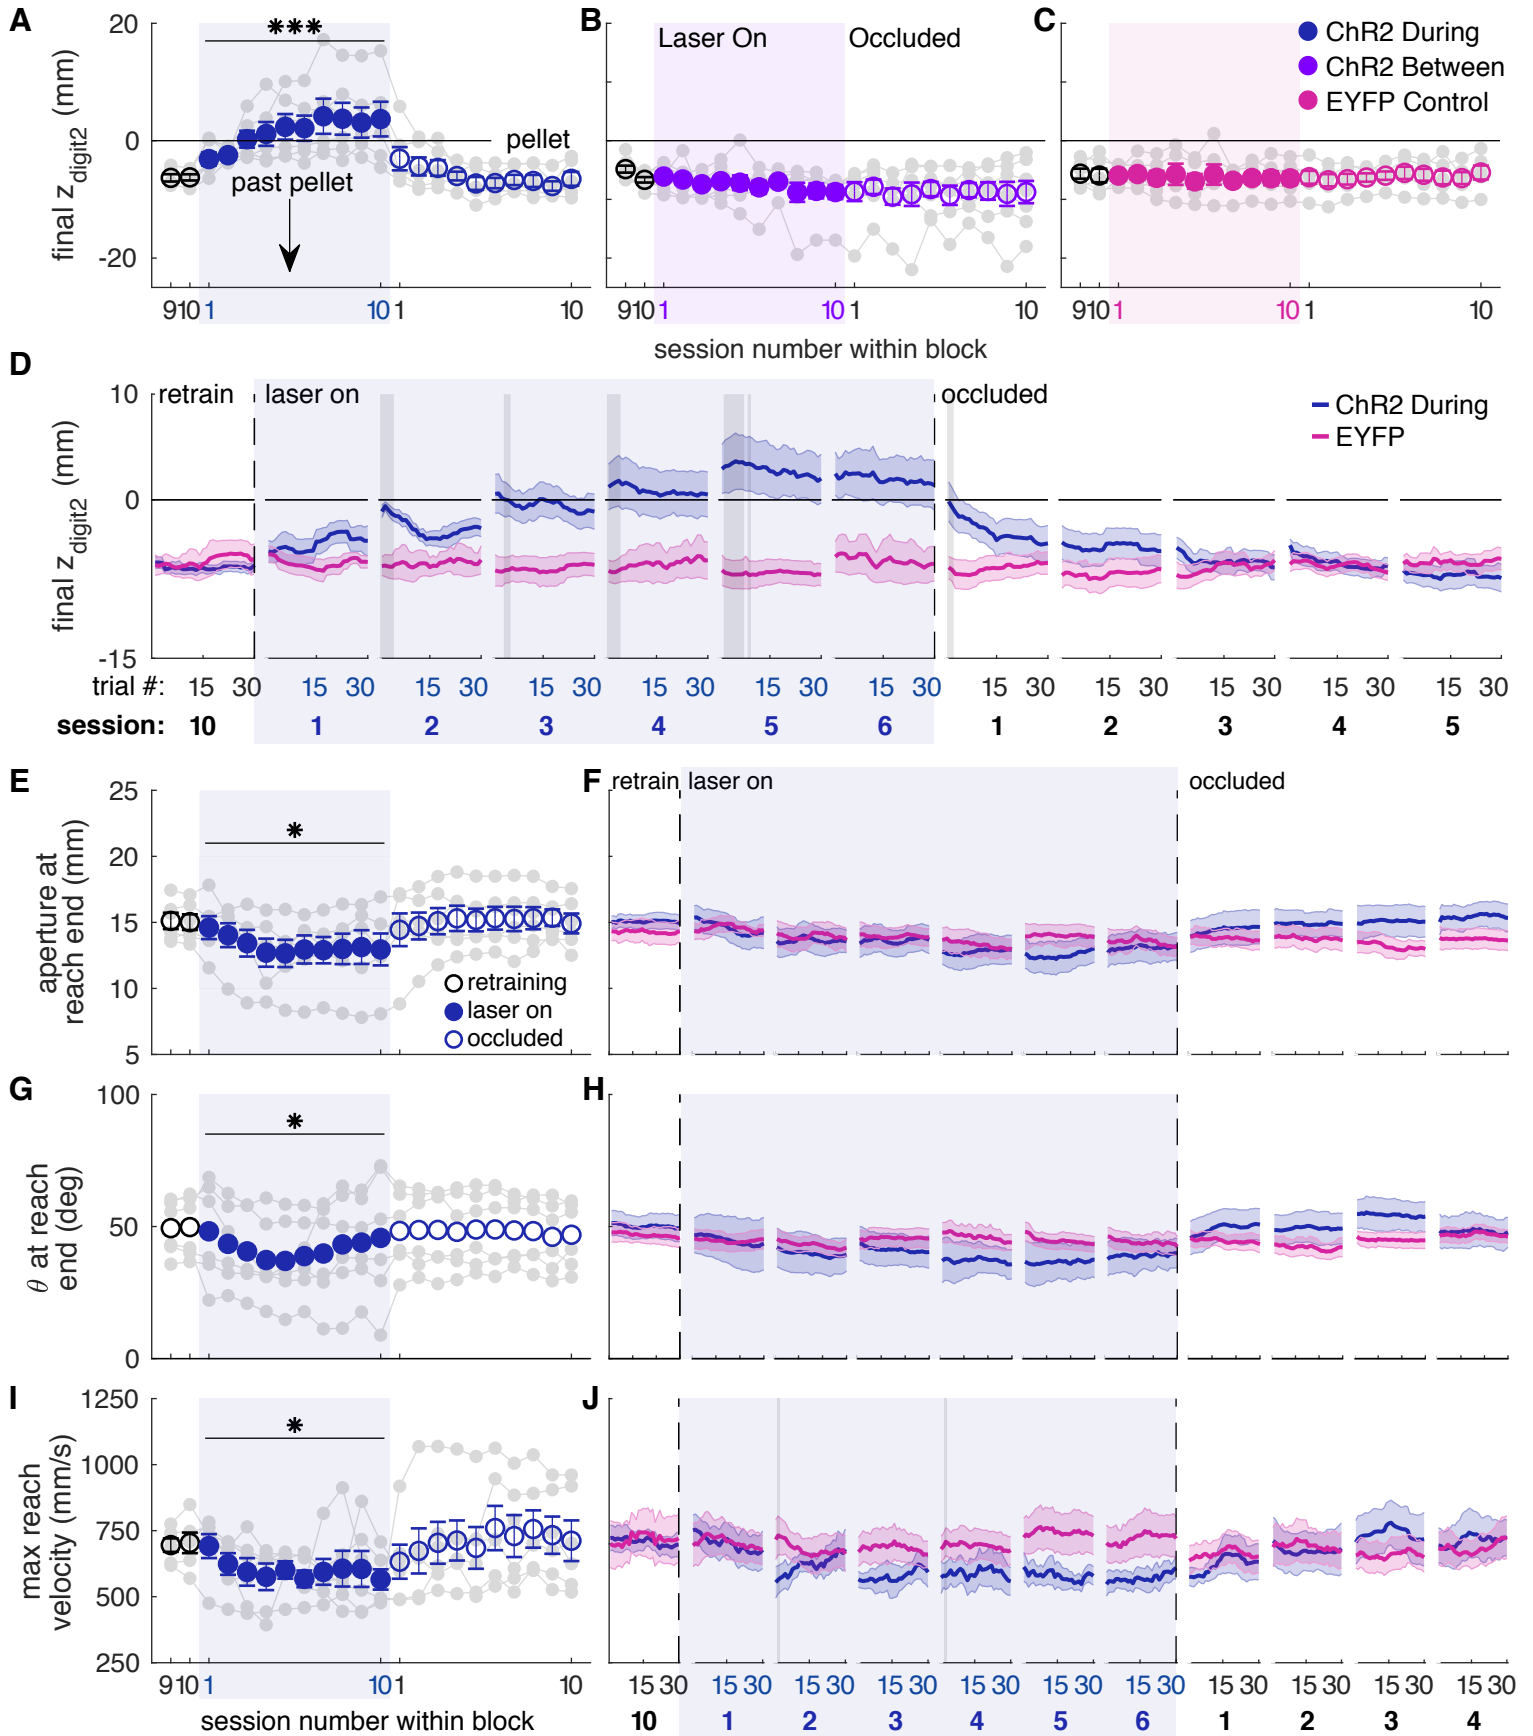

**Figure 6.** Dopamine neuron stimulation induces progressive changes in reach-to-grasp kinematics. **(A)** The average maximum reach extent progressively decreased across sessions with “during reach” stimulation. Linear mixed model: effect of laser:  $t(62) = 1.70$ ,  $P = 0.09$ ; interaction between laser and session:  $t(585) = 6.88$ ,  $P = 1.59 \times 10^{-11}$ . Average maximum reach extent returned to baseline within the first “occlusion” session. Contrast testing (“retraining” session 10 vs. “occlusion” session 1):  $t(585) = 1.62$ ,  $P = 0.11$ . **(B)** Same as (A) for “between reach” stimulation. Linear mixed model: effect of laser:  $t(62) = 0.02$ ,  $P = 0.99$ ; interaction between laser and session:  $t(585) = -0.43$ ,  $P = 0.67$ . **(C)** Same as (A) and (B) for “during reach” illumination in control EYFP-injected rats. Linear mixed model: effect of laser:  $t(62) = 0.10$ ,  $P = 0.92$ ; interaction between laser and session:  $t(585) = -0.68$ ,  $P = 0.50$ . **(D)** Moving average of maximum reach extent within the last “retraining” session, first 6 “laser on” sessions, and first 5 “occlusion” sessions. Grey shaded areas represent trials with a statistically significant difference between groups (Wilcoxon rank sum test,  $P < 0.01$ ). **(E)** Average grasp aperture at reach end for “during reach” stimulation. Linear mixed model: effect of laser:  $t(48) = -1.34$ ,  $P = 0.19$ ; interaction between laser and session:  $t(585) = -2.19$ ,  $P = 0.03$ . Average aperture returned to baseline within the first “occlusion” session. Contrast testing (“retraining” session 10 vs. “occlusion” session 1):  $t(585) = -0.87$ ,  $P = 0.38$ . **(F)** Moving average of aperture at reach end within the last “retraining” session, first 6 “laser on” sessions, and first 4 “occlusion” sessions. **(G)** Same as (E) for paw orientation. Linear mixed model: effect of laser:  $t(74) = -2.52$ ,  $P = 0.01$ ; interaction between laser and session:  $t(585) = 0.19$ ,  $P = 0.85$ . Average angle returned to baseline within the first “occlusion” session. Contrast testing (“retraining” session 10 vs. “occlusion” session 1):  $t(585) = 1.64$ ,  $P = 0.10$ . **(H)** Moving average of paw angle at reach end across trials in the last (10th) “retraining” session, first 6 “laser on” sessions, and first 4 “occlusion” sessions. Grey shaded areas represent trials with a statistically significant difference between groups (Wilcoxon rank sum test,  $P < 0.01$ ). **(I)** Same as (E) and (G) for maximum reach velocity. Linear mixed model: effect of laser:  $t(49) = -0.45$ ,  $P = 0.65$ ; interaction between laser and session:  $t(585) = -2.45$ ,  $P = 0.01$ . Average velocity returned to baseline within the first “occlusion” session. Contrast testing (“retraining” session 10 vs. “occlusion” session 1):  $t(585) = -1.64$ ,  $P = 0.10$ . **(J)** Moving average of maximum reach velocity within the last “retraining” session, first 6 “laser on” sessions, and first 4 “occlusion” sessions. Grey shaded areas represent trials with a statistically significant difference between groups (Wilcoxon rank sum test,  $P < 0.01$ ). Shaded colored areas in D, F, H, J and error bars in A, B, C, E, G, I represent s.e.m. Similar data for ChR2 Between rats are shown in Figure 6 – figure supplement 1. Individual rat data are shown in Figure 6 – figure supplements 2-5. \* indicates  $p < 0.05$  for the laser or laser-session interaction terms in panels E, G, I. \*\*\* indicates  $p < 1.0 \times 10^{-10}$  for the laser-session interaction term in panel A.

224 While dopamine neuron inhibition during reaching did not affect success rate  
225 (Figure 4C), it caused subtle changes in reach-to-grasp kinematics. Maximum reach  
226 extent lengthened slightly under dopamine neuron inhibition (that is, the paw extended  
227 further past the pellet, Figure 7A, C, Videos 3 and 4), in opposition to the effects of  
228 dopamine neuron stimulation. This effect almost reached significance in the linear  
229 mixed-effect model ( $p = 0.091$ , see Figure 7 caption), but a contrast test comparing  
230 laser day 10 to occlusion day 1 was significant ( $t(37) = -3.24$ ,  $P = 0.003$ ). Furthermore,  
231 reach extent consistently lengthened at the individual rat level (Figure 7A, gray markers)  
232 as well as across trials within sessions (Figure 7C, Figure 7 –figure supplement 2).  
233 Maximum reach velocity also decreased with dopamine inhibition (Figure 7H, I). This  
234 also was not quite significant in the linear mixed-effect model ( $p = 0.094$ , see Figure 7  
235 caption), but there was a significant difference between laser day 10 and occlusion day  
236 1 (contrast testing,  $t(33) = -2.49$ ,  $P = 0.018$ ). These data suggest that dopamine neuron  
237 stimulation and inhibition have roughly opposite effects on reach kinematics. Dopamine  
238 neuron inhibition did not significantly affect grasp aperture (Figure 7D, E) or paw  
239 orientation (Figure 7F, G), potentially due to ceiling effects. No kinematic changes were  
240 observed in rats that received dopamine neuron inhibition between reaches (Figure 7B  
241 and Figure 7 –figure supplements 1-5).

## 242 **Dopamine manipulations disrupt reach-to-grasp coordination**

243 Reach-to-grasp success requires precise coordination of a complex sequence of  
244 reach sub-movements. Reaches begin when the rat orients to the pellet with its nose,  
245 then lifts and aligns its paw at midline with the digits closed. As the forelimb advances  
246 towards the pellet, the digits extend and spread while the paw pronates. After the digits

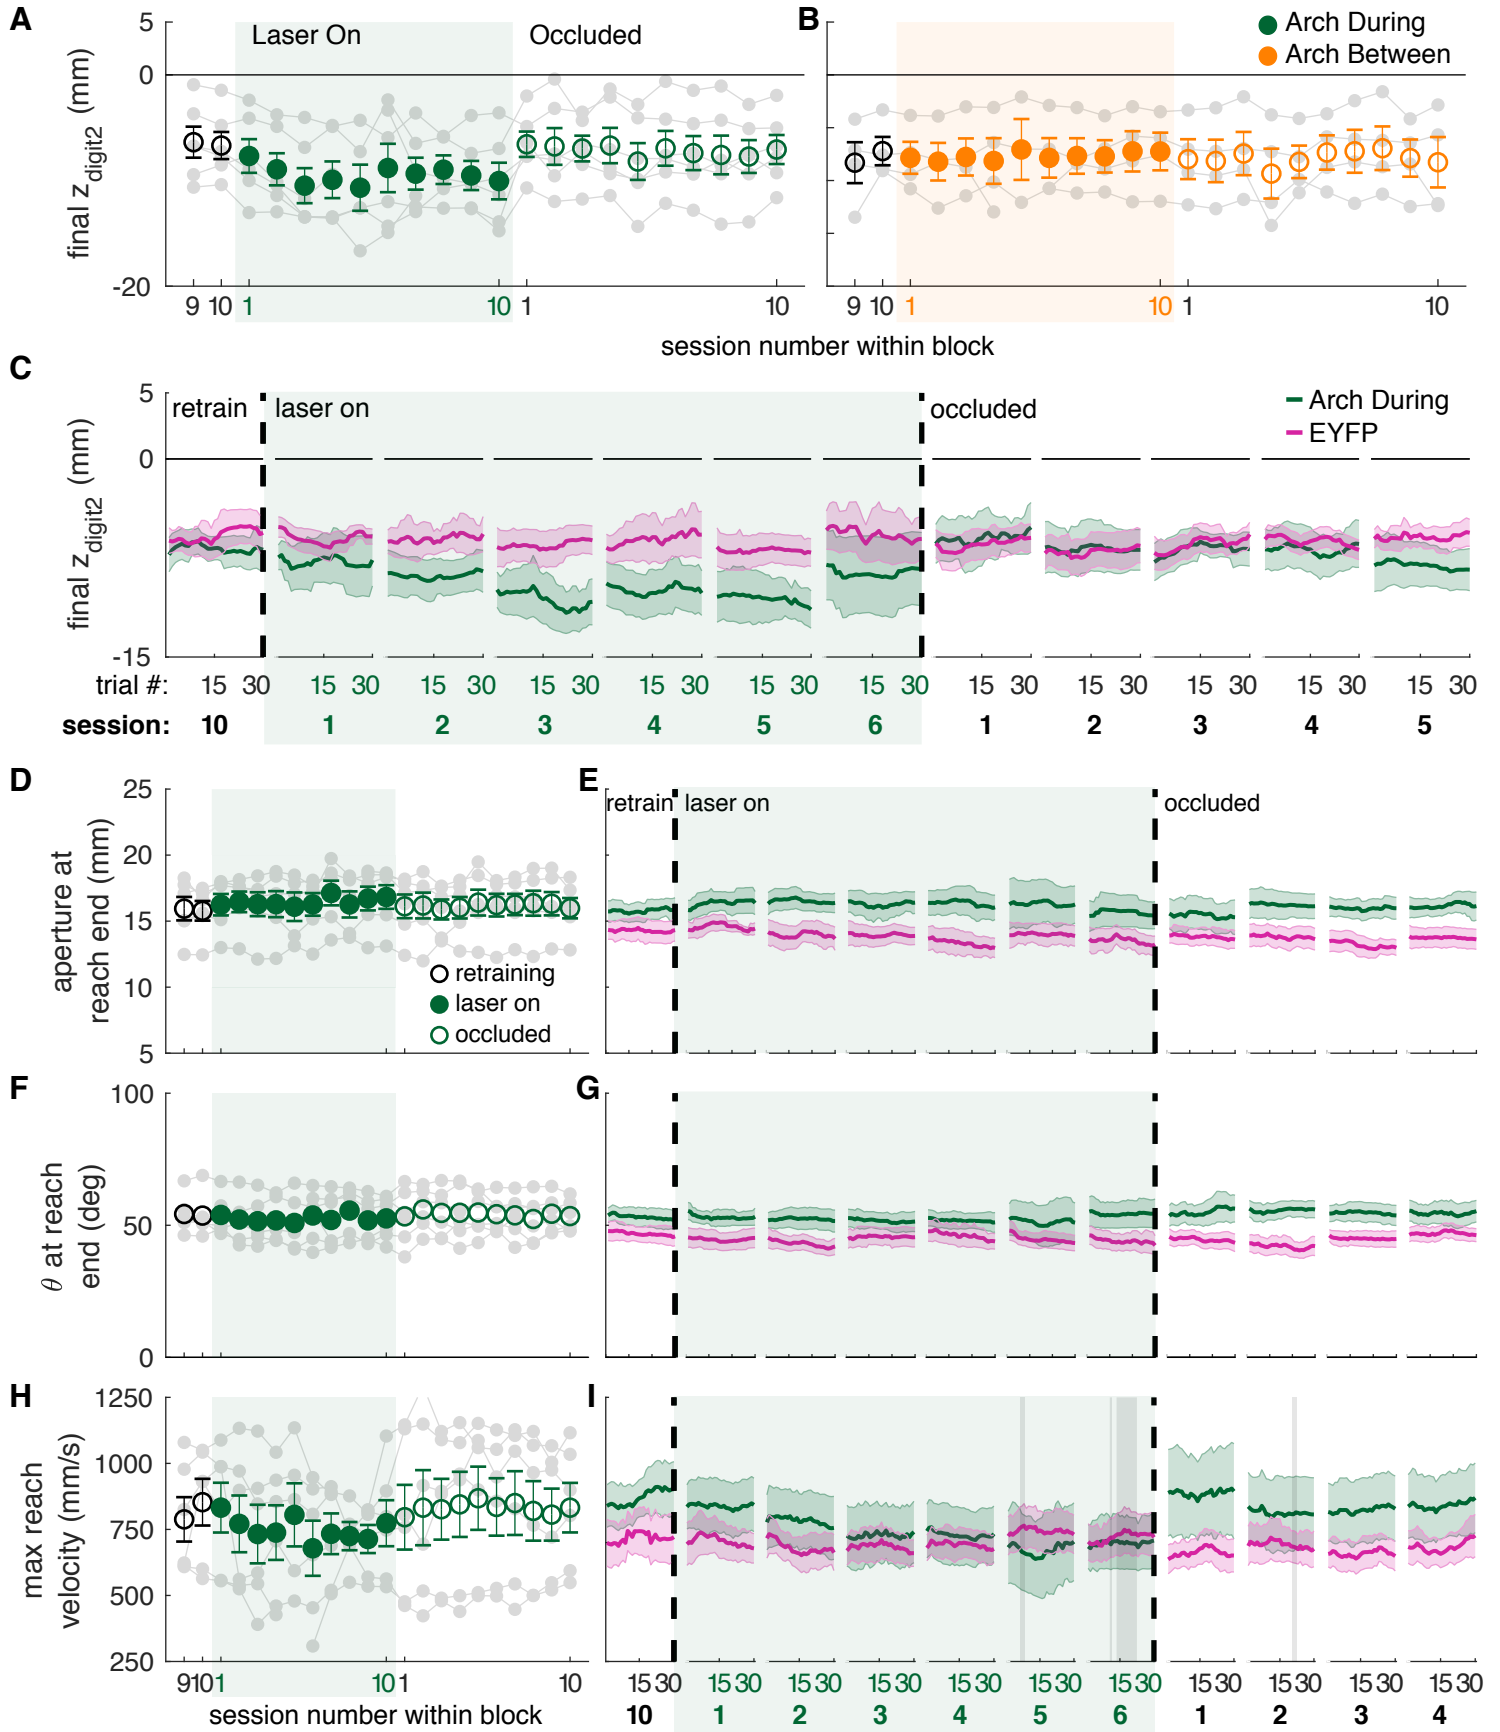



**Figure 7.** Dopamine neuron inhibition induces subtle changes in reach-to-grasp kinematics. **(A)** Average maximum reach extent across sessions for “during reach” inhibition. Linear mixed model: effect of laser:  $t(63) = -1.72$ ,  $P = 0.09$ ; interaction between laser and session:  $t(585) = 0.03$ ,  $P = 0.98$ . **(B)** Same as (A) for “between reach” inhibition. Linear mixed model: effect of laser:  $t(63) = -0.23$ ,  $P = 0.82$ ; interaction between laser and session:  $t(585) = 0.99$ ,  $P = 0.32$ . **(C)** Moving average of maximum reach extent within the last “retraining” sessions, first 6 “laser on” sessions, and first 5 “occlusion” sessions. **(D)** Same as (A) for aperture: effect of laser:  $t(48) = 0.53$ ,  $P = 0.60$ ; interaction between laser and session:  $t(585) = 1.76$ ,  $P = 0.08$ . **(E)** Moving average of grasp aperture at reach end within the last “retraining” session, first 6 “laser on” sessions, and first 4 “occlusion” sessions. **(F)** Same as (A) and (D) for paw orientation: effect of laser:  $t(75) = -0.20$ ,  $P = 0.84$ ; interaction between laser and session:  $t(585) = -0.28$ ,  $P = 0.78$ . **(G)** Moving average of paw angle at reach end within the last “retraining session, first 6 “laser on” sessions, and first 4 “occlusion” sessions. **(H)** Same as (A), (D), and (F) for maximum reach velocity: effect of laser:  $t(49) = -0.52$ ,  $P = 0.60$ ; interaction between laser and session:  $t(585) = -1.68$ ,  $P = 0.09$ . **(I)** Moving average of maximum reach velocity within the last “retraining” session, first 6 “laser on” sessions, and first 4 “occlusion” sessions. Grey shaded areas represent trials with a statistically significant difference between groups (Wilcoxon rank sum test,  $P < 0.01$ ). Shaded colored areas in C, E, G, I and error bars in A, B, D, F, H represent s.e.m. Similar data for Arch Between rats are shown in Figure 7 – figure supplement 1. Individual rat data are shown in Figure 7 – figure supplements 2-5.

247 close to grasp the pellet, the forelimb and paw are raised and supinated to bring the  
248 pellet towards the mouth (Alaverdashvili & Whishaw, 2010, Whishaw et al., 2008,  
249 Whishaw & Pellis, 1990). Because fine motor coordination is impaired in patients with  
250 Parkinson Disease, including during reaching-to-grasp (Whishaw et al., 2002), we  
251 looked to see if the coordination of reach sub-movements was affected by dopamine  
252 neuron stimulation or inhibition.

253 Dopamine neuron stimulation during reaching altered the coordination of digit  
254 spread (aperture) and paw pronation (orientation) with respect to paw advancement  
255 (Figures 8 and 9). Aperture increased earlier (when the paw was further from the pellet)  
256 in “during reach” stimulation sessions compared to “retraining” or “occlusion” sessions  
257 (Figure 9A, B). Thus, during dopamine stimulation, aperture was smaller at reach end  
258 but larger (on average) at matched distances from the pellet (Figures 6E, 8B, 9C).  
259 “During reach” dopamine neuron inhibition had the opposite effect – paw aperture  
260 began to increase when the paw was closer to the pellet compared to “retraining” or  
261 “occlusion” sessions (Figures 9A, B). Similar changes occurred with paw orientation:  
262 during sessions with dopamine neuron stimulation, paw pronation began further from  
263 the pellet (Figures 9D, E, F). Dopamine neuron inhibition, however, did not affect the  
264 relationship between paw orientation and paw advancement. As for other kinematic  
265 changes, the changes in coordination progressed across sessions (most evident in  
266 Figures 9C, F). No changes were observed in rats that received dopamine stimulation  
267 or inhibition between reaches or in EYFP control rats (Figures 9B, C, E, F and Figure 9  
268 – figure supplements 1-4). Together, these results suggest that dopamine neuron



### ChR2 During, Last Day Retraining

### ChR2 During, Laser On Day 10

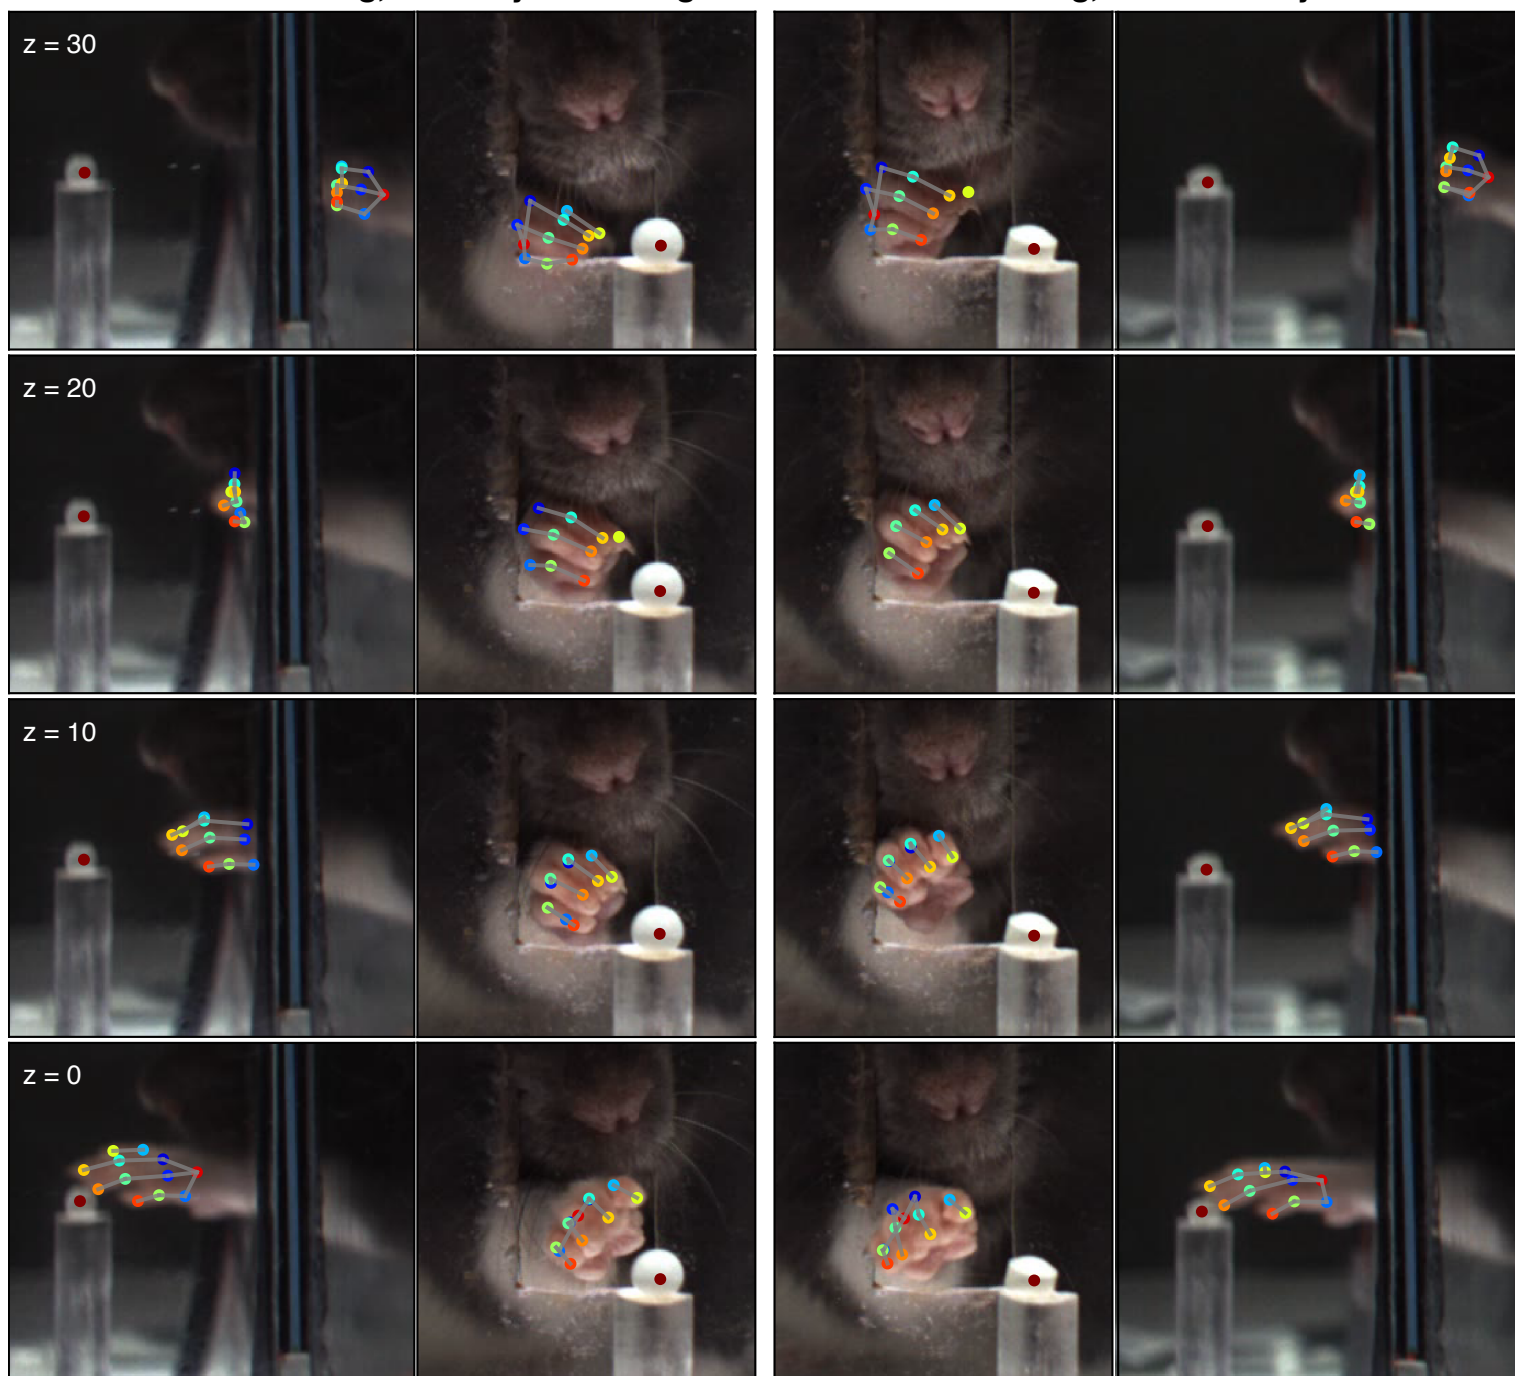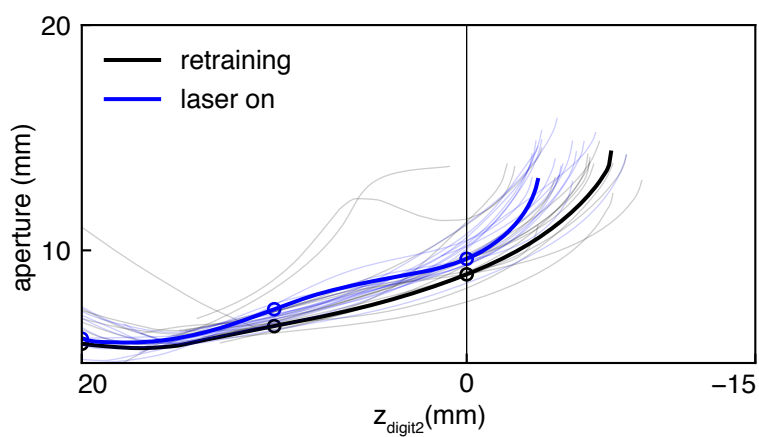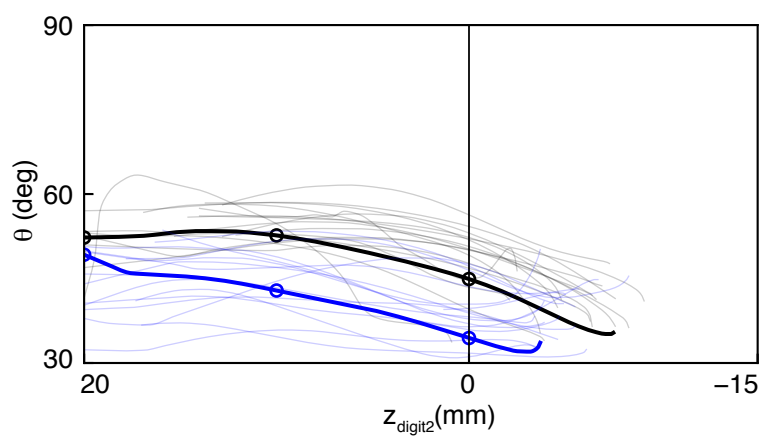

**Figure 8.** Dopamine neuron stimulation alters the coordination between digit movements and paw advancement. **(A)** Sample frames from single reaches at the end of “retraining” and “laser on” sessions from the same rat. Outer columns show the mirror views corresponding to the direct camera views in the inside columns. After 10 days of “during reach” stimulation, the rat pronates its paw and spreads its digits further from the pellet as the paw advances. **(B)** Aperture as a function of the z-coordinate of the second digit tip. Solid black and blue lines correspond to the reaches shown in (A). Thin black and blue lines are the traces for other reaches in the same sessions. Circles indicate apertures at the corresponding  $z_{\text{digit2}}$  values in A. **(C)** Same as (B) but for paw orientation.

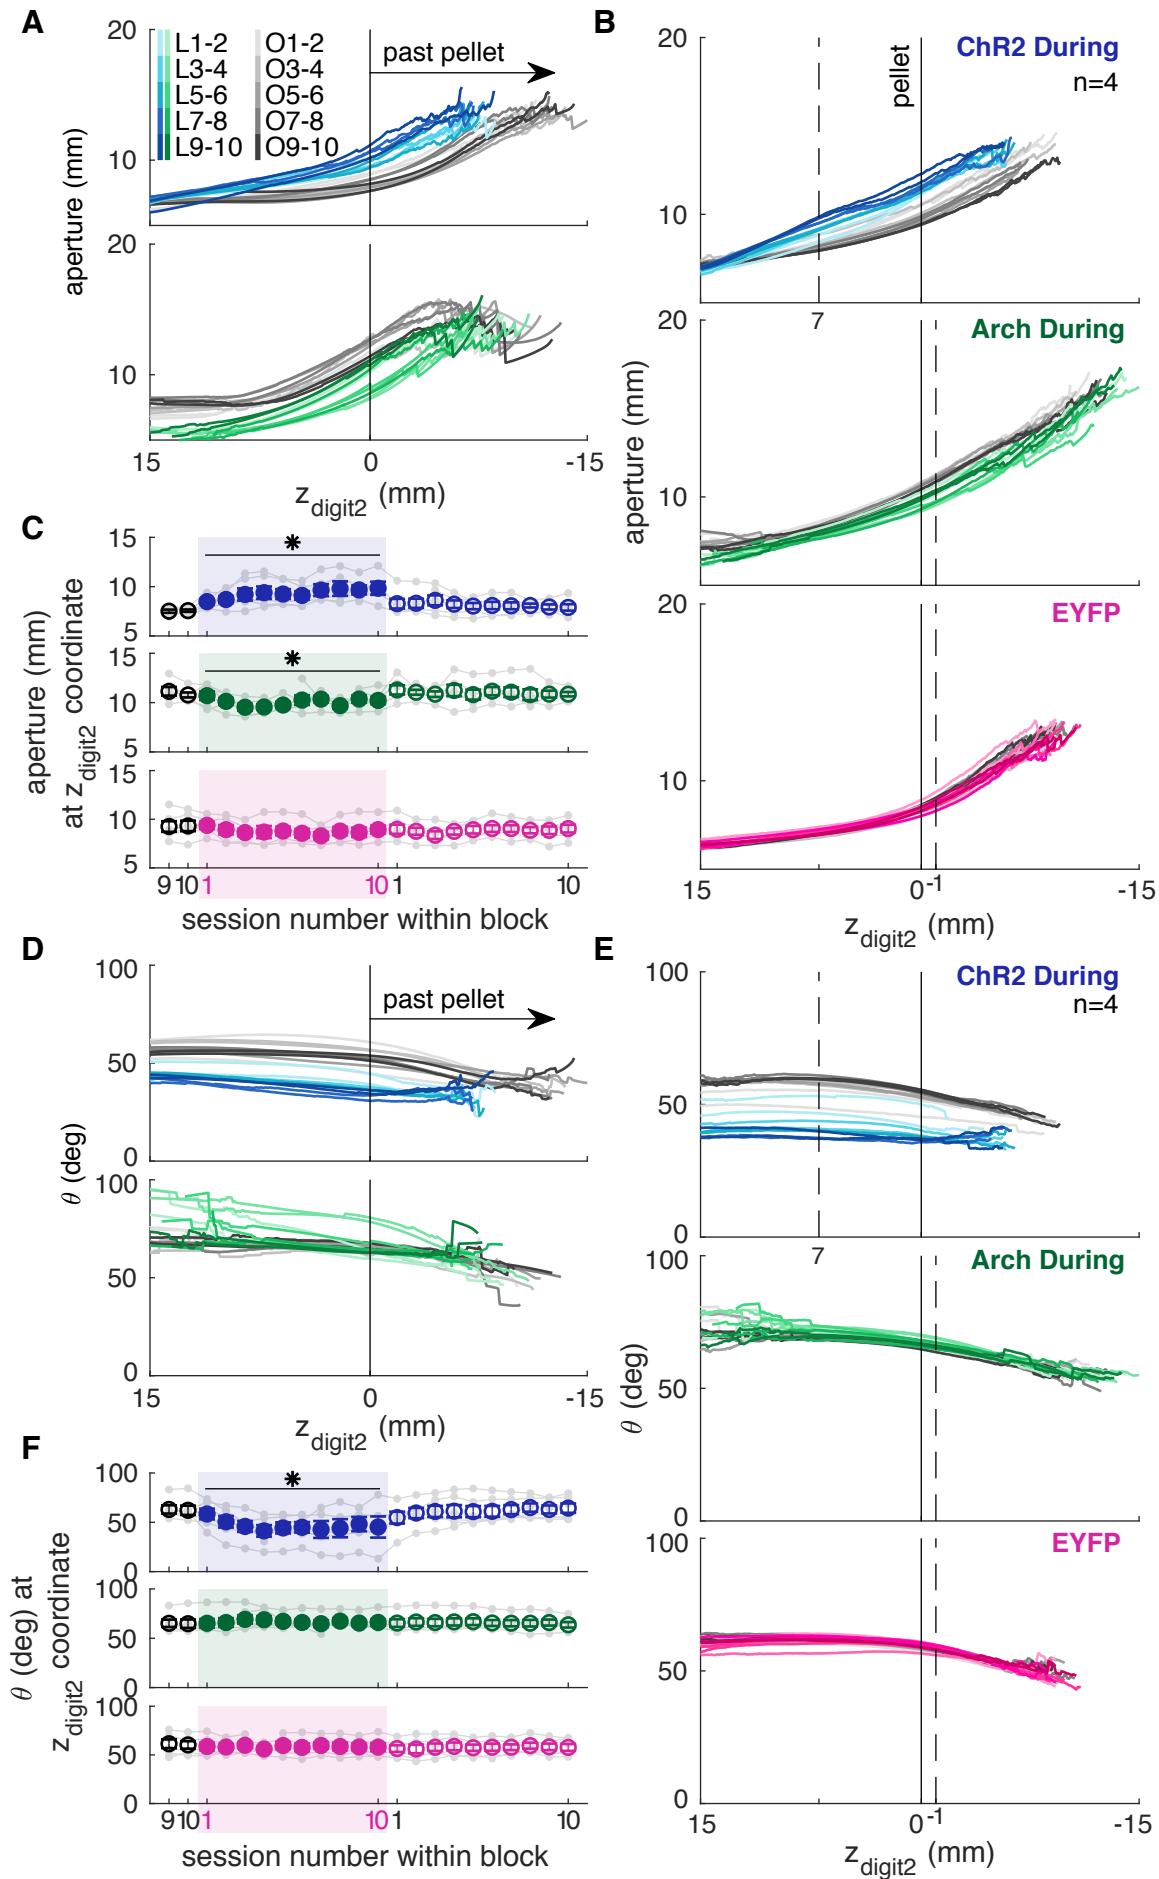

**Figure 9.** Dopamine neuron manipulations disrupt coordination of reach-to-grasp movements. **(A)** Mean aperture as a function of paw advancement ( $z_{\text{digit2}}$ , pellet at  $z_{\text{digit2}}=0$ ) across “laser on” and “occlusion” sessions for exemplar rats. All rats are shown in Figure 9 – figure supplement 3. L1-2, O1-2, ... indicate laser on sessions 1-2, occlusion sessions 1-2, etc. **(B)** Mean aperture as a function of paw advancement across “laser on” and “occlusion” sessions averaged across all rats. 4 of 6 “ChR2 During” rats are included because 2 rats’ reaches were too short in several sessions to produce a meaningful average (the average for all 6 ChR2 During rats, ChR2 Between rats, and Arch Between rats are shown in Figure 9 – figure supplement 1). All rats were included for other groups. Dashed lines indicate the  $z_{\text{digit2}}$  coordinate where data are sampled in (C) for each group. A more proximal  $z_{\text{digit2}}$  was chosen for “ChR2 During” because the majority of “laser on” reaches for this group did not extend past  $z_{\text{digit2}} = -1$  mm. **(C)** Average grasp aperture at the  $z_{\text{digit2}}$  coordinates indicated by the dashed lines in (B) across sessions. “During reach” stimulation gradually increased aperture at 7 mm from the pellet (linear mixed model including all 6 “during reach” rats: effect of laser:  $t(607) = 2.39$ ,  $P = 0.02$ ; interaction between laser and session:  $t(607) = 2.40$ ,  $P = 0.02$ ). “During reach” inhibition decreased aperture at 1 mm past the pellet (linear mixed model: effect of laser:  $t(607) = -2.04$ ,  $P = 0.04$ ; interaction between laser and session:  $t(607) = 0.67$ ,  $P = 0.51$ ). SNc illumination in EYFP-injected rats had no effect on aperture at 1 mm past the pellet (linear mixed model: effect of laser:  $t(607) = -0.57$ ,  $P = 0.57$ ; interaction between laser and session:  $t(607) = -0.61$ ,  $P = 0.54$ ). Grey points indicate data from individual rats. **(D)** Mean paw orientation as a function of paw advancement towards the pellet across “laser on” and “occlusion” sessions for exemplar rats. All rats are shown in Figure 9 – figure supplement 4. **(E)** Mean paw orientation as a function of paw advancement across “laser on” and “occlusion” sessions averaged across rats. Dashed lines indicate  $z_{\text{digit2}}$  coordinates where data are sampled in (F) for each group. 4 of 6 “ChR2 During” rats are included because 2 rats’ reaches were too short in several sessions to produce a meaningful average (the average for all 6 ChR2 During rats, ChR2 Between rats, and Arch Between rats are shown in Figure 9 – figure supplement 2). **(F)** Average paw orientation at  $z_{\text{digit2}}$  coordinates indicated by dashed lines in (E) across all sessions. “During reach” stimulation caused a gradual increase in pronation (i.e., a smaller angle) at 7 mm from the pellet (linear mixed model including all 6 “during reach” rats: effect of laser:  $t(607) = -2.34$ ,  $P = 0.02$ ; interaction between laser and session:  $t(607) = -2.33$ ,  $P = 0.02$ ). “During reach” inhibition had no effect on paw orientation at 1 mm past the pellet (linear mixed model: effect of laser:  $t(607) = 0.88$ ,  $P = 0.38$ ; interaction between laser and session:  $t(607) = -0.55$ ,  $P = 0.58$ ). SNc illumination in EYFP-injected rats had no effect on paw orientation at 1 mm past the pellet (linear mixed model: effect of laser:  $t(607) = -0.51$ ,  $P = 0.61$ ; interaction between laser and session:  $t(607) = 0.31$ ,  $P = 0.76$ ). Grey points indicate data from individual rats. \* indicates  $p < 0.05$  for either the laser or laser-session interaction terms in panels C and F.

269 stimulation accelerates transitions between reach sub-movements, while dopamine  
270 neuron inhibition has the opposite effect.

271

## 272 **Dopamine neuron stimulation establishes distinct reach-to-grasp representations**

273 Dopamine neuron stimulation gradually induced changes in reach-to-grasp  
274 kinematics, but kinematics rapidly recovered to baseline when the laser was occluded.  
275 We next asked if reinstating dopamine neuron stimulation would again gradually alter  
276 reach kinematics. Following testing with the laser occluded, six ChR2-injected rats that  
277 had received “between reach” stimulation performed additional “during reach”  
278 stimulation sessions. These continued until reach-to-grasp kinematics were impaired  
279 (average:  $3.17 \pm 0.98$  sessions). Once kinematics were impaired, rats performed an  
280 additional one or two 30-minute sessions during which the laser alternated every 5 trials  
281 between being off and on during reaches (Figure 10A).

282 Rats transitioned rapidly between “normal” and “impaired” reach-to-grasp  
283 kinematics with the laser off and on, respectively. The mean success rate dropped  
284 within a single trial of laser stimulation and improved within one trial when laser  
285 stimulation was removed (Figure 10C, Video 5). Similarly, reach kinematics required  
286 only one trial to switch between normal and aberrant reaching patterns. Laser  
287 stimulation at the beginning of an “on” block (trial 1) caused immediate decreases in  
288 maximum reach extent and digit aperture, which remained steady for the remaining  
289 “Laser On” trials. Similarly, maximum reach extent and digit aperture immediately  
290 increased upon cessation of dopamine neuron stimulation (trial 1, “Laser Off”) and  
291 remained steady throughout the “Laser Off” block (Figure 10D, E). There was also a

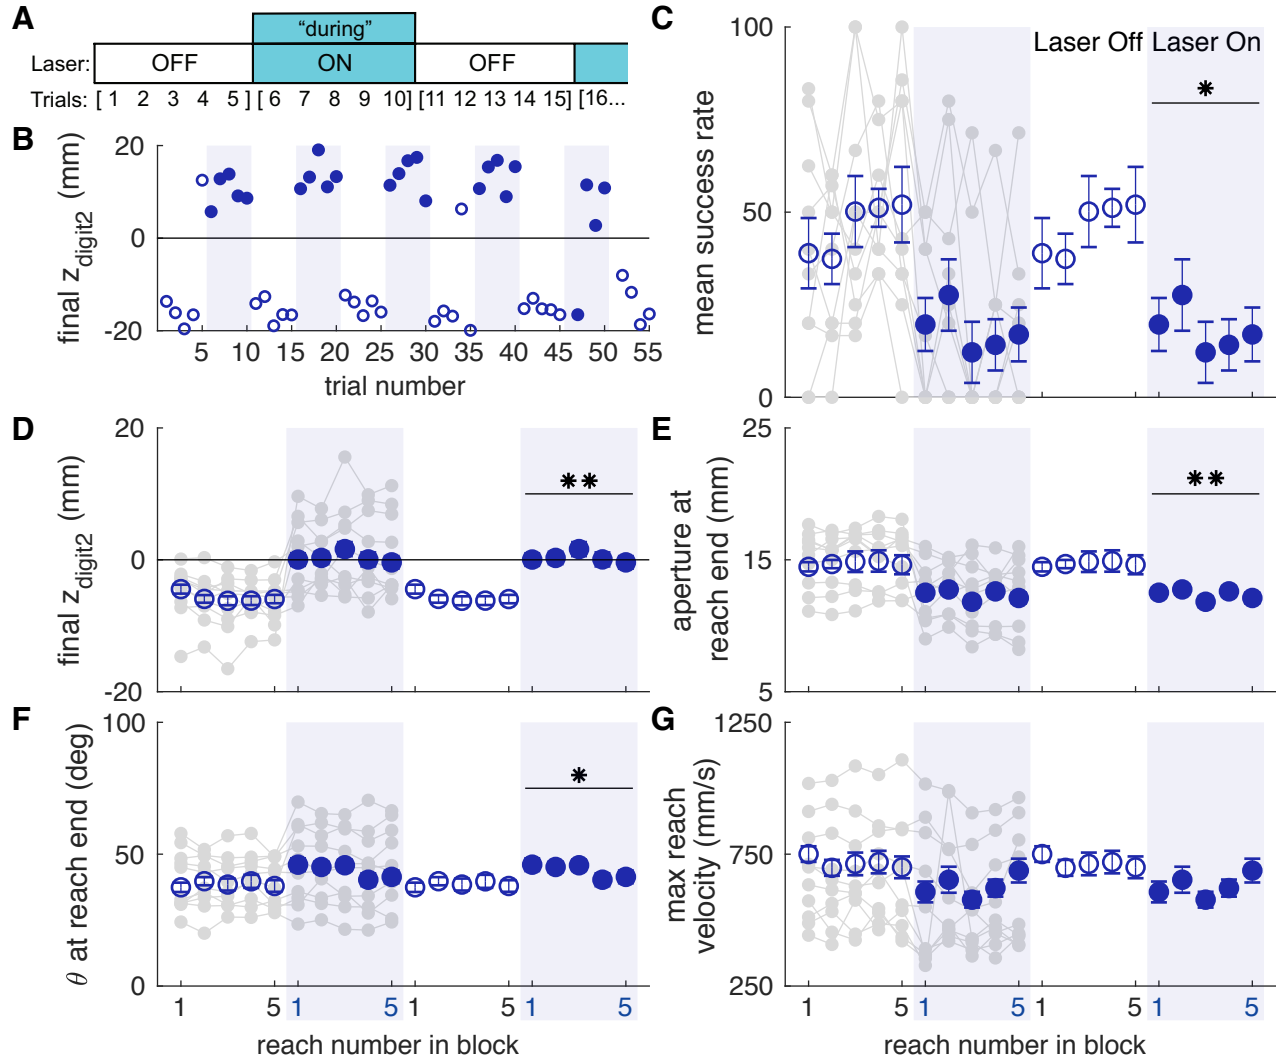

**Figure 10.** Dopamine neuron stimulation induces distinct reach-to-grasp kinematics that depend on current dopamine stimulation. **(A)** Schematic of alternating stimulation test sessions. **(B)** Example session from one rat with maximum reach extent plotted for every trial. Some blocks have fewer than 5 trials if the rat did not reach for the pellet after breaking the IR beam. **(C)** Average first attempt success rate during “laser off” and “laser on” blocks. Data are repeated to show “off to on” and “on to off” transitions. Grey lines show individual rat data. Linear mixed model: effect of laser:  $t(78) = -0.50$ ,  $P = 0.62$ ; interaction between laser and trial within block:  $t(78) = -2.35$ ,  $P = 0.02$ . **(D)** Average maximum reach extent during “laser off” and “laser on” blocks. Linear mixed model: effect of laser:  $t(78) = 2.70$ ,  $P = 8.47 \times 10^{-3}$ ; interaction between laser and trial within block:  $t(78) = 1.32$ ,  $P = 0.19$ . **(E)** Average aperture at reach end across “laser off” and “laser on” blocks. Linear mixed model: effect of laser:  $t(78) = -2.83$ ,  $P = 5.92 \times 10^{-3}$ ; interaction between laser and trial within block:  $t(78) = -0.79$ ,  $P = 0.43$ . **(F)** Average paw orientation at reach end across “laser off” and “laser on” blocks. Linear mixed model: effect of laser:  $t(78) = 2.57$ ,  $P = 0.01$ ; interaction between laser and trial within block:  $t(78) = -0.34$ ,  $P = 0.73$ . **(G)** Average maximum reach velocity across “laser off” and “laser on” blocks. Linear mixed model: effect of laser:  $t(78) = -1.24$ ,  $P = 0.22$ ; interaction between laser and trial within block:  $t(78) = 0.01$ ,  $P = 0.99$ . \* indicates  $p < 0.05$  for effect of laser in panel F. \*\* indicates  $p < 0.01$  for effect of laser in panel D.



292 significant change in paw orientation at reach end with dopamine neuron stimulation  
293 (Figure 10F). However, pronation decreased in these rats unlike in the “ChR2 During”  
294 group (Figure 6G). There was no significant difference in maximum reach velocity  
295 between “Laser On” and “Laser Off” blocks (Figure 10G). These data indicate that once  
296 distinct reaching kinematics have been established by repeated dopaminergic  
297 manipulations, current reach kinematics are determined by the activity of nigral  
298 dopamine neurons on that trial.

299

### 300 **Dopamine neuron stimulation induces context- and history-dependent abnormal** 301 **involuntary movements**

302 To verify fiber placement and opsin expression prior to reaching experiments, we  
303 placed rats in a clear cylinder and illuminated SNc with blue light of varying intensity  
304 (Figure 11A). We predicted that rats with well-placed fibers expressing high levels of  
305 ChR2 would develop increasingly worse abnormal involuntary movements (AIMs) as  
306 laser intensity increased. To our surprise, rats that subsequently developed markedly  
307 abnormal reach kinematics during the skilled reaching task appeared unaffected by  
308 dopamine neuron stimulation in the cylinder (AIMs Test 1, Figure 11B-F). In “post-  
309 reaching” cylinder sessions (AIMS Test 2, Figure 11B), however, dopamine neuron  
310 stimulation elicited markedly abnormal movements (Figure 11C-E, Figure 11, Video 6).  
311 Furthermore, while AIMs were obvious in the context of the cylinder, the same (or  
312 higher) stimulation intensities delivered while rats were reaching failed to elicit abnormal  
313 movements (other than altered reach kinematics). Thus, the expression of dopamine-

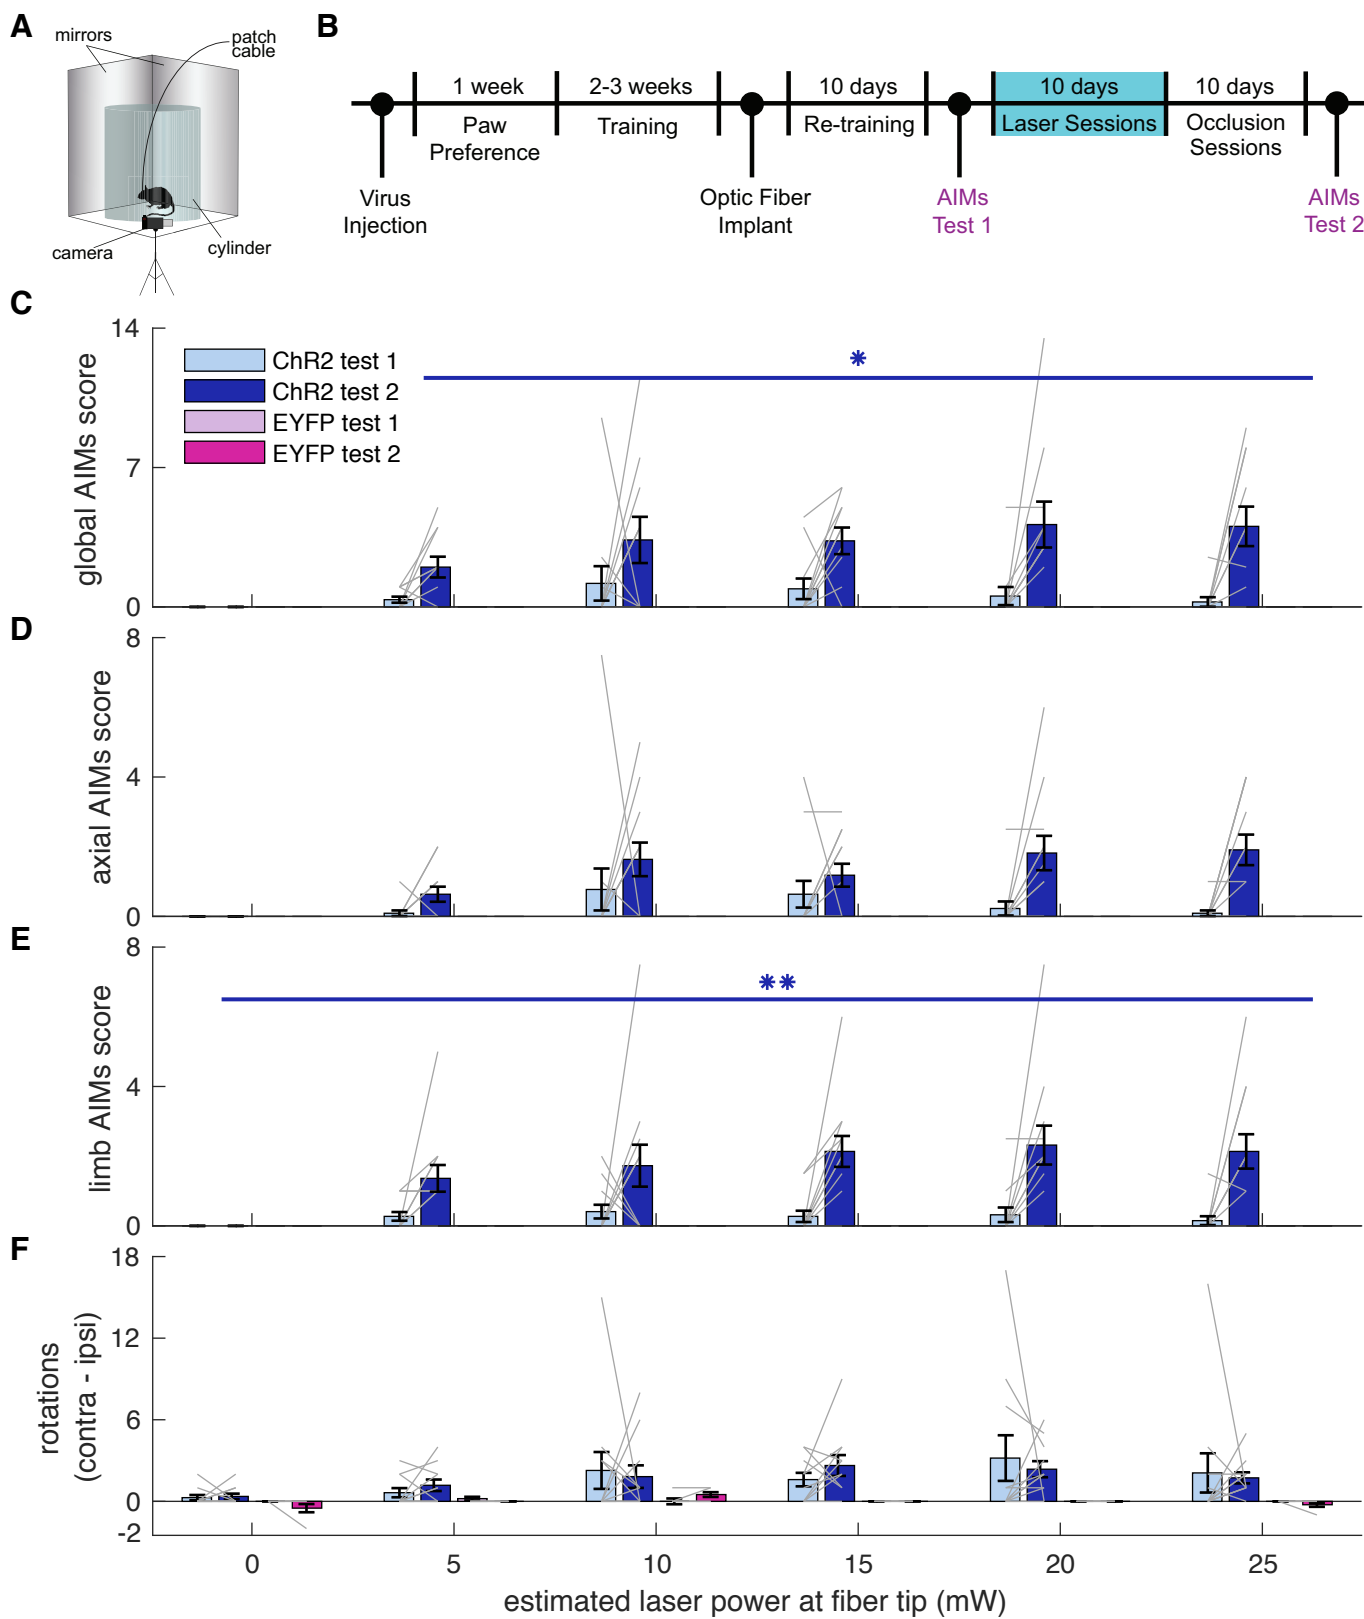



**Figure 11.** Dopamine neuron stimulation induces context- and history-dependent abnormal involuntary movements. **(A)** Experimental set-up for AIMs test. **(B)** Timeline of experiment. The first AIMs test took place one day before skilled reaching testing; the second took place one day after the last “occlusion” session. Repeated from Figure 1A for convenience. **(C)** Average global AIMs scores vs. estimated power at the fiber tip. Global AIMs increased with increasing laser power and from test day 1 to 2 in ChR2-injected rats (linear mixed model: interaction between test number and laser power:  $t(164) = 2.57, P = 0.01$ ). EYFP-injected rats did not display AIMs (linear mixed model: interaction between test number and laser power:  $t(164) = 0.00, P = 1.00$ ). Gray lines represent data from individual rats. Error bars represent s.e.m. across animals. **(D)** Average axial AIMs scores. ChR2: linear mixed model: interaction between test number and laser power:  $t(165) = 1.91, P = 0.06$ . EYFP:  $t(165) = 0.00, P = 1.00$ . **(E)** Average limb AIMs scores. A linear mixed-effects model found a significant interaction between test number and laser power in ChR2-injected rats:  $t(164) = 2.81, P = 5.51 \times 10^{-3}$ . EYFP-injected rats did not display limb AIMs:  $t(164) = 0.00, P = 1.00$ . **(F)** Difference between average number of contralateral and ipsilateral (relative to hemisphere implanted with optical fiber) rotations. A positive score indicates a bias towards contralateral spins and a negative score indicates a bias towards ipsilateral spins. ChR2-injected rats did not increase the number of contralateral spins between test 1 and test 2, nor did laser power affect rotational behavior. Linear mixed model: interaction between test number and laser power:  $t(164) = -0.39, P = 0.69$ . EYFP-injected rats did not show a bias in either direction with laser stimulation:  $t(164) = 0.10, P = 0.92$ . (\*  $P < 0.05$ , \*\*  $P < 0.01$  for ChR2-injected rats).

314 dependent AIMS depends not only on current levels of dopamine neuron activation, but  
315 the history of prior activation and the current behavioral context.

316

## 317 **Discussion**

318 Our goal was to determine how midbrain dopamine neuron manipulations affect  
319 dexterous skill. Our results revealed a role for dopamine in motor learning, as repeated  
320 dopamine manipulations induced gradual changes in reach-to-grasp kinematics. These  
321 manipulations not only affected gross performance measures (e.g., velocity and  
322 amplitude) but also disrupted coordinated execution of reach sub-movements. Once  
323 dopamine stimulation-induced changes were established, reach-to-grasp kinematics  
324 depended strongly on the dopamine status of the current trial. Furthermore, these  
325 effects were temporally specific – only manipulations during reaches influenced forelimb  
326 kinematics. Finally, the effect of dopamine on motor control is context-dependent, as the  
327 same dopamine stimulation in different situations induced distinct behavioral responses.

328 The history-dependent effects of dopamine on skilled reaching are superficially  
329 consistent with reinforcement learning models (Schultz, 2019). While most evidence for  
330 dopamine signals encoding RPEs comes from paradigms in which animals choose  
331 between discrete actions (e.g., press a right or left lever), recent studies suggest that  
332 dopamine encodes RPE-like “performance prediction errors” for complex behaviors with  
333 greater degrees of freedom (Beeler et al., 2010, Gadagkar et al., 2016). It is plausible  
334 that dopamine neuron excitation/inhibition creates an artificially reinforcing/discouraging  
335 signal that influences subsequent reaches. Within this framework, dopamine neuron  
336 stimulation (or inhibition), regardless of reach outcome, should gradually alter reach

337 kinematics. Furthermore, since there are many possible failure mechanisms, the  
338 changes in kinematics should be unpredictable. However, the effects of dopamine  
339 manipulations on reach kinematics were consistent, with dopamine neuron stimulation  
340 and inhibition inducing essentially opposite changes. This suggests that kinematic  
341 changes do not result purely from performance prediction error signals, but that  
342 dopamine intrinsically biases movement kinematics in a consistent direction.

343         Motion tracking data provide insight into the nature of this intrinsic dopamine  
344 bias. A common interpretation of dopamine's role in movement is that it regulates  
345 "vigor," which has been defined as the speed, frequency, and amplitude of movements  
346 (Dudman & Krakauer, 2016). Our dopamine manipulations influenced "vigor" in  
347 unexpected ways: dopamine neuron stimulation decreased, and inhibition increased,  
348 movement amplitude (reach extent). Furthermore, both stimulation and inhibition  
349 decreased movement speed. These effects apparently contradict previous work directly  
350 correlating dopaminergic tone with movement velocity and/or amplitude (Carr & White,  
351 1987, Leventhal et al., 2014, Panigrahi et al., 2015).

352         This discrepancy may be due to different demands on the motor system. "Vigor"  
353 assays generally demand movement along one dimension. For example, mice  
354 manipulating a joystick (Panigrahi et al., 2015), or humans moving a manipulandum to a  
355 target (Baraduc et al., 2013, Mazzoni et al., 2007) make forelimb/arm movements  
356 across large joints more or less along a single vector. In such tasks, dopamine-depleted  
357 subjects consistently make hypometric, bradykinetic movements. In contrast, skilled  
358 reaching comprises a sequence of precisely-coordinated submovements (Klein &  
359 Dunnett, 2012). Stimulation caused paw pronation and digit spread to occur earlier

360 along the reach trajectory (farther from the pellet), while inhibition delayed these  
361 submovements with respect to paw extension. This is consistent with evidence that  
362 dopamine regulates initiation of/transitions between movements (da Silva et al., 2018).  
363 That is, dopamine may increase the probability of initiating the next submovement in the  
364 skilled reaching sequence. This may be interpreted in a “vigor” framework as striatal  
365 dopamine invigorating the next submovement at the expense of the current one. In a  
366 complex, multi-component movement like skilled reaching, this would cause premature  
367 transitions and compress the overall reach-to-grasp sequence.

368         While kinematic changes developed gradually across sessions, once established  
369 they depended on the dopamine status of the current trial (Figure 10). This suggests  
370 that dopamine stimulation instantiated distinct representations of movement kinematics,  
371 which were selected for execution by current dopamine neuron activity. These  
372 representations could be stored in any motor-related brain region, or as an emergent  
373 property of larger motor circuits. However, the fact that we stimulated preferentially over  
374 SNc suggests that they are stored in striatum. Consistent with this idea, recent work  
375 identified subpopulations of direct pathway medium spiny neurons associated with  
376 dyskinesias after levodopa treatment in dopamine-depleted mice (Ryan et al., 2018).  
377 Furthermore, specific activation of these direct pathway MSNs induced dyskinesias  
378 (Girasole et al., 2018). These results suggest that subpopulations of striatal output  
379 neurons encode specific movement kinematics that are sensitive to striatal dopamine  
380 levels.

381         The abrupt transitions between aberrant and baseline reach kinematics are  
382 reminiscent of “on/off” motor fluctuations observed in people with PD. With disease

383 progression and prolonged treatment, patients often display sudden transitions between  
384 severe bradykinesia, good motor control, and levodopa-induced dyskinesias (Chou et  
385 al., 2018). Because disease duration, degree of dopamine loss, and magnitude of  
386 treatment-related dopamine fluctuations are correlated (Abercrombie et al., 1990, de la  
387 Fuente-Fernández et al., 2004), the root cause of motor fluctuations in PD patients is  
388 difficult to identify. Our results indicate that large, temporally specific dopamine  
389 fluctuations are sufficient to cause dramatic dopamine-dependent changes in movement  
390 kinematics, even in otherwise healthy subjects. This suggests that large swings in  
391 striatal dopamine are sufficient to generate motor fluctuations, independent of the  
392 degree of dopamine denervation.

393         The motor effects of dopamine neuron stimulation also depended on behavioral  
394 context. Dopamine neuron stimulation had almost no effect on stimulation-naïve rats in  
395 a clear cylinder. Rats engaged in skilled reaching during dopamine neuron stimulation  
396 continued to engage in the task, with few abnormal involuntary movements during  
397 reaching. However, the same stimulation parameters delivered to previously-stimulated  
398 rats in clear cylinders induced markedly abnormal limb and body movements (Figure 11  
399 and Video 6). Broadly, this is consistent with the idea that dopamine regulates the  
400 “vigor” of movements selected based on the current behavioral context (Yttri & Dudman,  
401 2016). That is, in the reaching chamber, rats approach the reaching slot to perform a  
402 (dopamine-modified) reach because that is the appropriate action in that context.  
403 Conversely, with no specific goal-directed actions suggested by the cylinder context,  
404 dopamine equally invigorates many potential movements. This leads to seemingly  
405 random abnormal involuntary movements (Bastide et al., 2015). Interestingly, the

406 severity of experimental levodopa-induced dyskinesias depends on behavioral context  
407 (Lane et al., 2011). Finally, this context dependence of dopaminergic effects on motor  
408 control has parallels in clinical phenomenology: people with PD often can perform goal-  
409 directed movements despite the presence of significant levodopa-induced dyskinesias.

410       There are several limitations of this study. First, we did not record from dopamine  
411 neurons or measure dopamine release during optogenetic manipulations. It is therefore  
412 not clear how striatal dopamine levels were altered relative to normal reach-related  
413 dopamine dynamics, or if repeated stimulation changed spontaneous or optically  
414 evoked dopamine release (Saunders et al., 2018). Given the relatively high optical  
415 stimulation power (20 mW at the fiber tip) and frequency (20 Hz) used, we suspect that  
416 we induced supraphysiologic dopamine release (Patriarchi et al., 2018). Nonetheless,  
417 supra/infraphysiologic manipulations (e.g., lesion studies) can provide important insights  
418 into normal function. Furthermore, supraphysiologic dopamine fluctuations are relevant  
419 to pathologic states like PD, in which striatal dopamine can transition over minutes to  
420 hours between very low and high levels (Abercrombie et al., 1990, de la Fuente-  
421 Fernández et al., 2004). Second, we stimulated over SNc. It is therefore unclear how  
422 ventral tegmental area (VTA) stimulation would influence skilled reaching, and whether  
423 stimulating specific nigral projection fields (e.g., striatal subregions or motor cortex, Guo  
424 et al., 2015, Hosp et al., 2011, Zhang et al., 2017) would differentially affect reach  
425 kinematics. Finally, while we found that dopamine neuron manipulations during, but not  
426 between, reaches affected reach kinematics, the timing of when dopamine  
427 manipulations exert their effects could be parsed more precisely. Our “during reach”  
428 timing covered approach to the pellet, the reach itself, and immediately after the grasp

429 during pellet consumption. Activation of different terminal fields at different times with  
430 respect to behavior may have dissociable effects on task performance.

431 In summary, temporally specific dopamine signals cause gradual changes in  
432 dexterous skill performance separable from pure “vigor” effects. These changes are  
433 durable, and expressed in a dopamine-dependent manner on a reach-by-reach basis.  
434 This phenomenon has clinical analogy with rapid motor fluctuations in PD patients. It  
435 may, therefore, serve as a useful paradigm in which to study the underlying  
436 neurobiology of motor fluctuations in PD, as well as address fundamental questions  
437 regarding how dopamine and basal ganglia circuits regulate skilled movements.

438

## 439 **Materials and methods**

440

### 441 **Rats**

442 All animal procedures were approved by the University of Michigan Institutional Animal  
443 Care & Use Committee. Numbers of rats included in each experimental group and  
444 analysis are indicated in figure legends and the main text. Male (n = 23) and female (n =  
445 15) tyrosine hydroxylase-Cre<sup>+</sup> (TH-Cre<sup>+</sup>) rats were housed in groups of 2-3 on a reverse  
446 light/dark cycle prior to optical fiber implantation. Following surgery, rats were housed  
447 individually to protect the implant. All testing was carried out during the dark phase.  
448 Food restriction was imposed on all animals during the training and testing periods for  
449 no more than 6 days in a row such that rats' weights were kept ~85-90% of their free-  
450 feeding weight. Water was available *ad libitum* in their home cages. Eight rats were  
451 excluded from the analysis due to either poor opsin expression or misplaced optical

452 fibers (number of rats excluded: Group 1: n = 1; Group 2: n = 3; Group 3: n = 3; Group  
453 4: n = 0; Group 5: n = 1). Judgment on whether to include subjects was made by  
454 investigators blinded to experimental groups and outcomes.

455

### 456 **Stereotaxic surgeries**

457 Before pre-training for skilled reaching, rats were anesthetized with isoflourane (5%  
458 induction and 2-3% maintenance) and bilaterally injected in the SNc (M-L  $\pm$  1.8 mm; A-P  
459 -5.2 mm, -6.2 mm; D-V -7.0 mm, -8.0 mm) with AAV-EF1 $\alpha$ -DIO-hChR2(H134R)-EFYP,  
460 AAV-EF1 $\alpha$ -DIO-eArch3.0-EYFP, or AAV-EF1 $\alpha$ -DIO-EYFP (UNC vector core). 1  $\mu$ l of  
461 virus (titer: 3.4-4.2x10<sup>12</sup> vg/ml) was injected per site (4  $\mu$ l total per hemisphere) at a rate  
462 of 0.1  $\mu$ l/min. After reaching stable performance on the skilled reaching task, optical  
463 fibers (multimode 200  $\mu$ m core, 0.39 NA, Thor Labs FT200EMT) embedded in stainless  
464 steel ferrules (2.5 mm outer diameter, 230  $\mu$ m bore size, Thor Labs #SF230-10) were  
465 implanted above SNc contralateral to the rat's preferred reaching paw (M-L  $\pm$  2.4 mm,  
466 A-P -5.3 mm, D-V -7.0 mm). Optical fibers were calibrated before implantation to  
467 determine optical power at the fiber tip as a function of laser output power, which was  
468 continuously monitored during experiments by "picking off" 10% of the laser output with  
469 a beamsplitter. Rats recovered for at least 7 days after surgical procedures before  
470 beginning behavioral training or testing.

471

### 472 **Skilled reaching**

473 *Automated reaching system.* Training and testing were carried out in custom-built skilled  
474 reaching chambers housed within soundproof, ventilated cabinets (Figure 1D, Bova et



475 al., 2019, Ellens et al., 2016). Infrared sensors (HoneyWell, Morriston, NJ) were aligned  
476 so that the beam was directed through the back of the chamber. A reaching slot (1.1 x 7  
477 cm) was cut into the front panel of the chamber 3.5 cm from the floor. One mirror was  
478 placed on either side of the front reaching chamber and angled to allow side views of  
479 the paw during reaches. A linear actuator with three position digital control (Creative  
480 Werks Inc., Des Moines, IA) and connected to an acrylic pellet delivery rod was  
481 mounted in a custom frame below the support box. The pellet delivery rod extended  
482 through a funnel mounted to the top of the frame. Before each session, the actuator was  
483 positioned so that the delivery rod was aligned with the right or left edge of the slot  
484 according to each rat's paw preference 15 mm from the front of the reaching slot.

485 Videos were recorded at 300 frames-per-second and 2400 x 1024 pixels by a  
486 high-definition color digital camera (acA2000-340kc, Basler, Ahrensburg, Germany)  
487 mounted in front of the reaching slot. A camera-link field programmable gate array  
488 (FPGA) frame-grabber card (PCIe 1473R, National Instruments, Austin, TX) acquired  
489 the images, and an FPGA data acquisition (DAQ) task control card (NI PCIe 7841R)  
490 provided an interface with the behavior chamber and optogenetic system. The real-time  
491 FPGA card detected pixel intensity changes within a "region of interest" in front of the  
492 reaching slot visible in the side mirror views (Figure 1D), allowing videos of the reaching  
493 event ("video trigger") to be captured. 300 frames pre-trigger and 1000 frames post-  
494 trigger were saved. A second camcorder was placed above the reaching chamber to  
495 record the entire session at 60 frames-per-second (HC-V110, Panasonic).

496

497 *Trial performance.* Custom LabVIEW software controls the experiment (Bova et al.,  
498 2019, Ellens et al., 2016). Each training session begins with the pellet delivery rod in the  
499 “ready” position - halfway between the bottom of the reaching chamber and the  
500 reaching slot. When the rat breaks the IR beam at the back of the chamber, the pellet  
501 delivery rod rises to the bottom of the reaching slot. When the reaching paw passes the  
502 front plane of the chamber into the “region of interest” and surpasses the minimum  
503 threshold of pixel intensity, video acquisition is triggered, time-stamped, and labeled  
504 with the trial number. Two seconds after the video is triggered, the pellet delivery arm  
505 lowers into the pellet funnel to pick up a new pellet and then resets to the “ready”  
506 position, allowing the rat to initiate a new trial.

507  
508 *Pre-training.* “Pre-training” consists of familiarizing the rats with the reaching chamber,  
509 evaluating them for paw-preference, training them to reach for the linear actuator, and  
510 training them to request a pellet by moving to the back of the chamber. A week before  
511 pre-training, rats were placed on food restriction and introduced to the sucrose reward  
512 pellets in their home cages. On day 1 of pre-training, piles of five pellets each were  
513 placed in the front and rear of the skilled reaching chamber to encourage exploration of  
514 the entire chamber. Once rats ate these pellets, they were evaluated for paw-  
515 preference.

516 Rats were allowed to eat 3 pellets (held in forceps through the reaching slot) with  
517 their tongues. The experimenter then began to pull the pellet away from the rat so that it  
518 could not be obtained by licking. Therefore, the rat was forced to reach with its paw to  
519 retrieve the pellet. Paw preference was assigned to the paw used for the majority of the

520 first eleven reaches. Once paw preference was determined, animals were trained to  
521 reach for the pellet delivery rod. As the rat reached, the experimenter pulled the forceps  
522 back so that the rat's paw would extend to a pellet on the delivery rod. Once rats  
523 reached for the delivery rod 10 times without being baited by the experimenter, they  
524 began training to request pellets.

525 Rats began training in the center of the chamber with the pellet delivery rod set to  
526 the "ready" position. The experimenter placed a pellet in the rear of the chamber to bait  
527 the rat to break the rear IR beam, causing the delivery rod to rise so that the rat could  
528 move to the front and reach for the pellet. This was repeated until the rat began to  
529 quickly move to the front of the chamber to reach for the pellet after breaking the IR  
530 beam. At this point, the experimenter would stop baiting the rat to the rear of the  
531 chamber. Pre-training was complete once the rat requested a pellet and then  
532 immediately moved to the front to reach for the pellet 10 times.

533

534 *Training.* After pre-training, rats began 30-minute training sessions with the automated  
535 system. Rats were trained for 6 days per week until they reached stable performance  
536 (minimum of 35 reaches and a steady success rate above 40% over 3 sessions). Once  
537 behavioral criteria were met, rats were implanted with optical fibers.

538

### 539 **Optogenetics**

540 Before testing with optogenetic interventions, rats were re-trained for 10 days while  
541 tethered to the patch cable without light delivery. This allowed rats to return to stable  
542 performance after surgery and adapt to the tether. During the 10 days of testing with

543 optogenetic interventions, light was delivered on every trial at one of two different times.  
544 For “during reach” stimulation, the laser turned on when the rat broke the IR beam at  
545 the back of the chamber and remained on until 3 seconds after the video trigger event.  
546 For “between reach” stimulation, light was delivered beginning 5 seconds after the video  
547 trigger and remained on for 4 seconds (Figure 1D). The duration of “between reach”  
548 stimulation was approximately matched to the average duration of “during reach”  
549 stimulation. For ChR2- and EYFP-injected rats, 473 nm laser light (Opto Engine DPSS  
550 laser) was delivered at 20 Hz and an estimated 20 mW at the fiber tip based on pre-  
551 implantation measurements using a calibrated photodiode (Thorlabs S121C connected  
552 to Thorlabs PM100D Power Meter). The laser was on continuously, with 20 Hz  
553 stimulation achieved using an optical chopper (Thorlabs MC1F10HP) to eliminate  
554 transient power fluctuations as the laser is turned off and on. For Arch-injected rats, 532  
555 nm laser light (Opto Engine DPSS laser) was delivered continuously at an estimated 20  
556 mW at the fiber tip.

557       Following optogenetic testing, rats were tested for another 10 days with the patch  
558 cable attached to the implanted fiber and the laser activated. However, the patch cable-  
559 implanted fiber junction was physically occluded by inserting a piece of dense foam  
560 within the connector that holds the patch cable and optical fiber. Full occlusion of the  
561 laser was checked before each session by measuring light output at the fiber tip using a  
562 calibrated photodiode (Thorlabs S121C connected to Thorlabs PM100D Power Meter).  
563 In this way, all sensory cues were identical (e.g., visible light, optical shutter sounds) but  
564 light could not penetrate into the brain. The timing of light delivery was identical to that  
565 used during testing with optogenetic interventions.

## 566 **Analysis of Skilled Reaching Data**

567 Analyses were performed using custom-written scripts and functions in MATLAB 2019a  
568 (MathWorks).

569

### 570 *Number of trials and success rate*

571 Reach outcome was scored by visual inspection as follows: 0 – no pellet presented or  
572 other mechanical failure; 1 – first trial success (obtained pellet on initial limb advance); 2  
573 – success (obtained pellet, but not on first attempt); 3 – forelimb advanced, pellet was  
574 grasped then dropped in the box; 4 – forelimb advance, but the pellet was knocked off  
575 the shelf; 5 – pellet was obtained using its tongue; 6 – the rat approached the slot but  
576 retreated without advancing its forelimb or the video triggered without a reach; 7 – the  
577 rat reached, but the pellet remained on the shelf; 8 – the rat used its contralateral paw  
578 to reach; 9 – laser fired at the wrong time; or 10 – used preferred paw after obtaining or  
579 moving pellet with tongue.

580 First reach success was calculated for each session by dividing the total number  
581 of scores of 1 by the total number of reaches (sum of scores of 1, 2, 3, 4, and 7). For  
582 both number of trials per session and first reach success rate, a baseline score was  
583 calculated for each rat by averaging the scores of the last two retraining sessions  
584 (Figure 2A,D). Number of trials and success rates for each session within “laser on” and  
585 “occlusion” sessions were normalized by dividing the score for that session by the  
586 averaged baseline score (Figures 2B-C, 2E-F, 3A-B, and 4A-D).

587 To assess how success rate changed within individual sessions, a moving  
588 average was calculated as the fraction of “1” scores in a moving block of 10 reaches.

589 For averages within a group, the last data point for each individual was carried forward  
590 to the maximum number of reaches for any rat in that session. This avoided sudden  
591 changes in the average caused by dropout (Figures 2G and supplementary 1, 3C and  
592 supplementary 1, 4E and supplementary 1-2).

593

### 594 *3-dimensional reconstruction of reach trajectories*

595 Bodyparts/objects identified in the direct and mirror views were triangulated to 3-  
596 dimensional points using custom MATLAB software (Bova et al., 2019). Prior to each  
597 session, several images of a cube with checkerboards (4 x 4 mm squares) on its sides  
598 were taken so that the checkerboards were visible in the direct and mirror views. These  
599 images were used to determine the essential matrix relating the direct and mirror views,  
600 which was used to determine how the real camera and “virtual” camera behind the  
601 mirror were translated and rotated with respect to each other (Hartley & Zisserman,  
602 2003). By assuming a 3-dimensional coordinate system centered at the camera lens  
603 with the z-axis perpendicular to the lens surface, camera matrices were derived for the  
604 real and virtual cameras. These matrices were used to triangulate matching points in  
605 the camera and mirror views using the MATLAB triangulate function in the Computer  
606 Vision toolbox. 3-dimensional points with large reprojection errors were excluded from  
607 the analysis, which could happen if an object was identified accurately in one view but  
608 misidentified in the other.

609

610

611

612 *Processing Reach Kinematics*

613 To place reach kinematics in a common reference frame, the pellet location prior to  
614 reaching was identified and set as the origin. For left-pawed reaches, x-coordinates  
615 were negated to allow direct comparison with right-pawed reaches. The initial reach on  
616 each trial was identified by finding the first frame in which digits were visible outside the  
617 box, and then looking backwards in time until the paw started moving forward. The end  
618 of a reach was defined as the frame at which the tip of the second digit began to retract  
619 (“maximum reach extent”,  $z_{digit2}$ ). “Aperture” was calculated as the Euclidean distance  
620 between the tips of the 1<sup>st</sup> and 4<sup>th</sup> digits (in frames for which both were visible or could  
621 be estimated based on epipolar geometry). “Orientation” was calculated as the angle  
622 between a line connecting the 1<sup>st</sup> and 4<sup>th</sup> digits and a horizontal line (for left-pawed rats,  
623 orientation was calculated using the negated x-values to compare with right-pawed  
624 rats). Paw velocity was calculated as the Euclidean distance between the dorsum of the  
625 reaching paw in consecutive frames divided by the inter-frame interval (1/300 s).

626

627 *Within-session kinematics*

628 To assess how reach kinematics (i.e., maximum reach extent, aperture, paw orientation,  
629 and maximum reach velocity) changed within individual sessions, a moving average  
630 was calculated by averaging kinematic data across a moving block of 10 trials. For  
631 averages within an experimental group, the last data point was carried forward to the  
632 end of the data set. This avoided sudden changes in the average caused by rats  
633 performing different numbers of trials within a session.

634

635 *Analysis of reach-to-grasp coordination*

636 To monitor aperture and paw orientation as a function of the z-coordinate of the tip of  
637 the second digit ( $z_{\text{digit2}}$ , Figures 8, 9 and all Figure 9 supplements), the first reach of  
638 each trial was isolated. The 3-dimensional trajectory of each digit tip for the initial reach  
639 was interpolated using piecewise cubic hermite polynomials (*pchip* in MATLAB) so that  
640 the 3-dimensional location of each digit was estimated for  $z_{\text{digit2}} = +20.0, +19.9, +19.8\dots$   
641  $-14.9, -15.0$  mm from the pellet (positive numbers are as the paw approaches the pellet,  
642 negative numbers are past the pellet). This allows us to average aperture and  
643 orientation as a function of paw advancement (assessed by  $z_{\text{digit2}}$ ).

644 Two rats from the “ChR2 During” group were excluded from the averaged  
645 aperture and paw orientation as a function of  $z_{\text{digit2}}$  (Figure 9B, E). The majority of these  
646 rats’ reaches during “laser sessions” were so short that there were not enough trials  
647 with full trajectories to produce a meaningful average (see Figure 9 – figure  
648 supplements 1-2 for analysis with all 6 rats).

649 To compare the evolution of aperture and paw orientation between retraining,  
650 laser, and occlusion sessions, we compared digit aperture and paw orientation at  
651 specific  $z_{\text{digit2}}$  values. For all groups except “ChR2 During” and “ChR2 Between”, we  
652 evaluated aperture and orientation at  $z_{\text{digit2}} = 1$  mm past the pellet ( $z_{\text{digit2}} = -1$  mm).  
653 Because rats frequently did not reach past the pellet when dopamine neurons were  
654 activated “during reach”, we analyzed aperture and paw orientation at  $z_{\text{digit2}} = 7$  mm  
655 before the pellet ( $z_{\text{digit2}} = +7$  mm) for this group.

656

657



## 658 **Abnormal Involuntary Movements (AIMs) Testing**

659 Rats underwent AIMs testing twice – one day before the first day of retraining and one  
660 day after the last day of occlusion sessions. Rats were attached to the patch cable and  
661 placed into a clear plexiglass cylinder (diameter = 8.3 in). Two mirrors were placed  
662 behind the chamber so that the animal was visible in all positions in recordings. Once in  
663 the cylinder, animals underwent a series of 30 second stimulation epochs alternating  
664 with 30 second rest periods. Sessions always began with a rest period (baseline), and  
665 the order of laser power (estimated 5, 10, 15, 20, 25 mW at fiber tip) was randomly  
666 generated in Matlab. Stimulation was applied at 20 Hz at a 50% duty cycle. Stimulation  
667 sessions were video recorded at 60 frames-per-second (HC-V110, Panasonic).

668         AIMs videos were segmented into individual videos for each stimulation bout and  
669 assigned random codes so that scorers were blinded to the rat's virus (ChR2 or EYFP),  
670 laser power, and day of testing. Axial and limb AIMs were scored for both severity  
671 (amplitude scale) and duration (basic scale) (Sebastianutto et al., 2016). The amplitude  
672 and basic scores were multiplied to create a composite score for axial and limb AIMs.  
673 Global AIMs scores were the sum of the axial and limb composite scores. Rotational  
674 behavior was also analyzed by counting the number of full 360 degree rotations in the  
675 contralateral and ipsilateral directions during each 30 second video. Ipsilateral turns  
676 were subtracted from contralateral turns to identify a rotational bias.

677

## 678 **Immunohistochemistry**

679 Rats were deeply anesthetized with isoflurane (5%) and transcardially perfused with  
680 cold saline followed by 4% paraformaldehyde. Brains were post-fixed for no more than

681 24 h at 4°C, rinsed with saline, and moved through 20% and 30% sucrose solutions (in  
682 PBS) at 4°C. Sagittal sections (30 µm thickness) were taken around SNc and where the  
683 optical fiber was visible on a cryostat (Leica Microsystems). To verify localization of viral  
684 expression in dopamine neurons and optical fiber placement above SNc, we performed  
685 immunohistochemistry for tyrosine hydroxylase and EYFP. Mounted sections were  
686 washed with PBS and incubated with Triton X-100 and PBS (PBS-Tx) for 15 minutes.  
687 Slides were then incubated in 5% normal donkey serum (NDS) for 1 hour before  
688 primary antibody incubation (mouse anti-GFP, 1:1500, Life Technologies; rabbit anti-  
689 TH, 1:2000, Millipore) overnight at room temperature with NDS and PBS-Tx. Sections  
690 were then washed with PBS-Tx and incubated with secondary antibodies (Alexa Fluor  
691 488 donkey anti-mouse, 1:500, Life Technologies; Alexa Fluor 555 donkey anti-rabbit,  
692 1:500, Fisher Scientific) for 2 h at room temperature. After washing 4 times with PBS,  
693 sections were coverslipped with ProLong Diamond (Invitrogen), allowed to dry for 24 h,  
694 and then imaged with an Axioskops 2 Plus microscope fitted with an Olympus DP72  
695 camera.

696 Images were stitched together and TH- and EYFP-stained images were overlaid  
697 in Photoshop to verify localization of viral expression to dopamine neurons. Images  
698 were evaluated by two people blinded to the behavioral outcomes of the individual rats  
699 on 1) sufficient virus expression in SNc and striatal dopamine neurons, and 2) location  
700 of fiber tip over SNc. Data from rats whose histology was evaluated as not meeting both  
701 of these criteria by both evaluators were removed from the analysis (n = 8 rats removed,  
702 Figure 1 – figure supplement 1). To obtain coordinates of optical fiber tips, histology

703 images were overlaid on sagittal brain atlas images of the approximate M-L coordinate  
704 (Paxinos and Watson 1998) and A-P and D-V coordinates were ascertained.

705

## 706 **Statistics**

707 Linear mixed-effects models were used to evaluate the effects of laser on performance  
708 outcomes and reach kinematics over sessions. We implemented linear mixed-effects  
709 models (using R *lmer*) with random intercepts/effects for each rat (where effect of laser  
710 varied between rats) and main interaction effects of group, session number, and laser.  
711 For normalized success rate and number of trials data, the inverse hyperbolic sine was  
712 taken before analysis in the linear mixed-effects model to deal with zeroes in the  
713 dataset. Post hoc contrast testing was performed on these linear mixed-effects models  
714 to make comparisons between specific sessions within groups (using R, 'contest1D').  
715 Similar models were used to evaluate changes in aperture and paw orientation at  
716 specific  $Z_{\text{digit2}}$  coordinates in Figures 9C and 9F. However, random effects were  
717 designated where the effect of session varied between rats. To assess the effect of  
718 laser on reach kinematics in alternating sessions (Figure 10), we implemented a linear  
719 mixed-effects model with random intercepts/effects for each rat (where the effect of trial  
720 number within block varied between rats) and main interaction effects of laser and trial  
721 number within blocks. To assess how AIMs changed from the first to second day of  
722 testing and under different laser powers, we implemented a linear mixed-effects model  
723 with random effects for each rat (where the effect of test number varied between rats)  
724 and main interaction effects of group, test number, and laser power. To assess  
725 differences between groups in within-session analyses, we applied Wilcoxon rank sum

726 tests (using MATLAB *ranksum*) at each trial number, with a *P* cutoff of 0.01 for  
727 significance.

728

## 729 **ACKNOWLEDGMENTS**

730 This work was supported by the University of Michigan, an nVidia GPU grant, and NIH  
731 K08-NS072183.

732

## 733 **REFERENCES**

734 Abercrombie ED, Bonatz AE, Zigmond MJ. Effects of L-dopa on extracellular dopamine  
735 in striatum of normal and 6-hydroxydopamine-treated rats. *Brain Res.* 1990; 525  
736 36-44. doi:10.1016/0006-8993(90)91318-B.

737 Alaverdashvili M, Whishaw IQ. Compensation aids skilled reaching in aging and in  
738 recovery from forelimb motor cortex stroke in the rat. *Neuroscience.* 2010; 167 21-  
739 30. doi:10.1016/j.neuroscience.2010.02.001.

740 Arbuthnott GW, Ungerstedt U. Turning behavior induced by electrical stimulation of the  
741 nigro-neostriatal system of the rat. *Exp Neurol.* 1975; 47(1) 162-172.  
742 doi:10.1016/0014-4886(75)90244-7. PubMed PMID: 164362.

743 Baraduc P, Thobois S, Gan J, Broussolle E, Desmurget M. A common optimization  
744 principle for motor execution in healthy subjects and parkinsonian patients. *J*  
745 *Neurosci.* 2013; 33(2) 665-677. doi:10.1523/JNEUROSCI.1482-12.2013. PubMed  
746 PMID: 23303945. PMCID: PMC6704928.

- 747 Barter JW, Li S, Lu D et al. Beyond reward prediction errors: the role of dopamine in  
748 movement kinematics. *Front Integr Neurosci.* 2015; 9 39.  
749 doi:10.3389/fnint.2015.00039. PMCID: PMC4444742.
- 750 Bastide MF, Meissner WG, Picconi B et al. Pathophysiology of L-dopa-induced motor  
751 and non-motor complications in Parkinson's disease. *Prog Neurobiol.* 2015; 132  
752 96-168. doi:10.1016/j.pneurobio.2015.07.002. PubMed PMID: 26209473.
- 753 Beeler JA, Cao ZFH, Kheirbek MA et al. Dopamine-dependent motor learning: insight  
754 into levodopa's long-duration response. *Ann Neurol.* 2010; 67 639-647.  
755 doi:10.1002/ana.21947. PMCID: PMC3129617.
- 756 Beeler JA, Frank MJ, Mcdaid J et al. A role for dopamine-mediated learning in the  
757 pathophysiology and treatment of Parkinson's disease. *Cell Rep.* 2012; 2 1747-  
758 1761. doi:10.1016/j.celrep.2012.11.014. PMCID: PMC3538862.
- 759 Beeler JA, Petzinger G, Jakowec MW. The Enemy within: Propagation of Aberrant  
760 Corticostriatal Learning to Cortical Function in Parkinson's Disease. *Front Neurol.*  
761 2013; 4 134. doi:10.3389/fneur.2013.00134. PMCID: PMC3770942.
- 762 Bova A, Kernodle K, Mulligan K, Leventhal D. Automated Rat Single-Pellet Reaching  
763 with 3-Dimensional Reconstruction of Paw and Digit Trajectories. *J Vis Exp.* 2019;  
764 149) doi:10.3791/59979. PubMed PMID: 31355787.
- 765 Carr GD, White NM. Effects of systemic and intracranial amphetamine injections on  
766 behavior in the open field: a detailed analysis. *Pharmacol Biochem Behav.* 1987;  
767 27 113-122.

- 768 Chou KL, Stacy M, Simuni T et al. The spectrum of “off” in Parkinson’s disease: What  
769 have we learned over 40 years. *Parkinsonism Relat Disord*. 2018; 51 9-16.  
770 doi:10.1016/j.parkreldis.2018.02.001. PubMed PMID: 29456046.
- 771 Coddington LT, Dudman JT. The timing of action determines reward prediction signals  
772 in identified midbrain dopamine neurons. *Nat Neurosci*. 2018; 21(11) 1563-1573.  
773 doi:10.1038/s41593-018-0245-7. PubMed PMID: 30323275. PMCID:  
774 PMC6226028.
- 775 Da Silva JA, Tecuapetla F, Paixão V, Costa RM. Dopamine neuron activity before  
776 action initiation gates and invigorates future movements. *Nature*. 2018; 554(7691)  
777 244-248. doi:10.1038/nature25457.
- 778 De La Fuente-Fernández R, Sossi V, Huang Z et al. Levodopa-induced changes in  
779 synaptic dopamine levels increase with progression of Parkinson’s disease:  
780 implications for dyskinesias. *Brain*. 2004; 127 2747-2754.  
781 doi:10.1093/brain/awh290.
- 782 Dowd E, Dunnett SB. Comparison of 6-hydroxydopamine-induced medial forebrain  
783 bundle and nigrostriatal terminal lesions in a lateralised nose-poking task in rats.  
784 *Behav Brain Res*. 2005; 159 153-161. doi:10.1016/j.bbr.2004.10.010.
- 785 Dudman JT, Krakauer JW. The basal ganglia: from motor commands to the control of  
786 vigor. *Curr Opin Neurobiol*. 2016; doi:10.1016/j.conb.2016.02.005.
- 787 Ellens DJ, Gaidica M, Toader A et al. An automated rat single pellet reaching system  
788 with high-speed video capture. *Journal of Neuroscience Methods*. 2016; 271 119-  
789 127. doi:10.1016/j.jneumeth.2016.07.009. PMCID: PMC5003677.

790 Foki T, Vanbellingen T, Lungu C et al. Limb-kinetic apraxia affects activities of daily  
791 living in Parkinson's disease: a multi-center study. *Eur J Neurol*. 2016; 23(8) 1301-  
792 1307. doi:10.1111/ene.13021. PubMed PMID: 27132653. PMCID: PMC5565263.

793 Gadagkar V, Puzerey PA, Chen R, Baird-Daniel E, Farhang AR, Goldberg JH.  
794 Dopamine neurons encode performance error in singing birds. *Science*. 2016; 354  
795 1278-1282. doi:10.1126/science.aah6837. PMCID: PMC5464363.

796 Gebhardt A, Vanbellingen T, Baronti F, Kersten B, Bohlhalter S. Poor dopaminergic  
797 response of impaired dexterity in Parkinson's disease: Bradykinesia or limb kinetic  
798 apraxia. *Mov Disord*. 2008; 23(12) 1701-1706. doi:10.1002/mds.22199. PubMed  
799 PMID: 18649388.

800 Girasole AE, Lum MY, Nathaniel D et al. A Subpopulation of Striatal Neurons Mediates  
801 Levodopa-Induced Dyskinesia. *Neuron*. 2018; 97(4) 787-795.e6.  
802 doi:10.1016/j.neuron.2018.01.017.

803 Glimcher PW. Understanding dopamine and reinforcement learning: the dopamine  
804 reward prediction error hypothesis. *Proc Natl Acad Sci U S A*. 2011; 108 Suppl  
805 15647-15654. doi:10.1073/pnas.1014269108. PMCID: PMC3176615.

806 Guo L, Xiong H, Kim J-II et al. Dynamic rewiring of neural circuits in the motor cortex in  
807 mouse models of Parkinson's disease. *Nat Neurosci*. 2015; 18 1299-1309.  
808 doi:10.1038/nn.4082. PMCID: PMC4551606.

809 Hartley R, Zisserman A. *Multiple view geometry in computer vision*. 2 ed. New York:  
810 Cambridge University Press; 2003.



- 811 Hosp JA, Pekanovic A, Rioult-Pedotti MS, Luft AR. Dopaminergic projections from  
812 midbrain to primary motor cortex mediate motor skill learning. *J Neurosci*. 2011; 31  
813 2481-2487. doi:10.1523/JNEUROSCI.5411-10.2011.
- 814 Howe MW, Dombeck DA. Rapid signalling in distinct dopaminergic axons during  
815 locomotion and reward. *Nature*. 2016; 535 505-510. doi:10.1038/nature18942.  
816 PMID: PMC4970879.
- 817 Hyland BI, Seeger-Armbruster S, Smither RA, Parr-Brownlie LC. Altered Recruitment of  
818 Motor Cortex Neuronal Activity During the Grasping Phase of Skilled Reaching in a  
819 Chronic Rat Model of Unilateral Parkinsonism. *J Neurosci*. 2019; 39(48) 9660-  
820 9672. doi:10.1523/JNEUROSCI.0720-19.2019. PubMed PMID: 31641050. PMID:  
821 PMC6880456.
- 822 Jin X, Costa RM. Start/stop signals emerge in nigrostriatal circuits during sequence  
823 learning. *Nature*. 2010; 466 457-462. doi:10.1038/nature09263.
- 824 Klein A, Dunnett SB. Analysis of Skilled Forelimb Movement in Rats: The Single Pellet  
825 Reaching Test and Staircase Test. *Current Protocols in Neuroscience*. 2012; 58  
826 8.28.1-8.28.15.
- 827 Klein A, Sacrey L-ARA, Whishaw IQ, Dunnett SB. The use of rodent skilled reaching as  
828 a translational model for investigating brain damage and disease. *Neurosci*  
829 *Biobehav Rev*. 2012; 36 1030-1042. doi:10.1016/j.neubiorev.2011.12.010.
- 830 Lane EL, Daly CS, Smith GA, Dunnett SB. Context-driven changes in l-DOPA-induced  
831 behaviours in the 6-OHDA lesioned rat. *Neurobiol Dis*. 2011; 42 99-107.  
832 doi:10.1016/j.nbd.2011.01.010.

- 833 Lee SH, Lee MJ, Lyoo CH, Cho H, Lee MS. Impaired finger dexterity and nigrostriatal  
834 dopamine loss in Parkinson's disease. *J Neural Transm (Vienna)*. 2018; 125(9)  
835 1333-1339. doi:10.1007/s00702-018-1901-5. PubMed PMID: 29971496.
- 836 Lemke SM, Ramanathan DS, Guo L, Won SJ, Ganguly K. Emergent modular neural  
837 control drives coordinated motor actions. *Nat Neurosci*. 2019; 22(7) 1122-1131.  
838 doi:10.1038/s41593-019-0407-2. PubMed PMID: 31133689. PMCID:  
839 PMC6592763.
- 840 Leventhal DK, Stoetzner CR, Abraham R, Pettibone J, Demarco K, Berke JD.  
841 Dissociable effects of dopamine on learning and performance within sensorimotor  
842 striatum. *Basal Ganglia*. 2014; 4 43-54. doi:10.1016/j.baga.2013.11.001. PMCID:  
843 PMC4058866.
- 844 Mathis A, Mamidanna P, Cury KM et al. DeepLabCut: markerless pose estimation of  
845 user-defined body parts with deep learning. *Nature Neuroscience*. 2018; 21(9)  
846 1281-1289. doi:10.1038/s41593-018-0209-y.
- 847 Mazzoni P, Hristova A, Krakauer JW. Why don't we move faster? Parkinson's disease,  
848 movement vigor, and implicit motivation. *J Neurosci*. 2007; 27 7105-7116.  
849 doi:10.1523/JNEUROSCI.0264-07.2007.
- 850 Mohebi A, Pettibone JR, Hamid AA et al. Dissociable dopamine dynamics for learning  
851 and motivation. *Nature*. 2019; 570(7759) 65-70. doi:10.1038/s41586-019-1235-y.  
852 PubMed PMID: 31118513. PMCID: PMC6555489.
- 853 Palmiter RD. Dopamine signaling in the dorsal striatum is essential for motivated  
854 behaviors: lessons from dopamine-deficient mice. *Ann N Y Acad Sci*. 2008; 1129

855 35-46. doi:10.1196/annals.1417.003. PubMed PMID: 18591467. PMCID:  
856 PMC2720267.

857 Panigrahi B, Martin KA, Li Y et al. Dopamine Is Required for the Neural Representation  
858 and Control of Movement Vigor. *Cell*. 2015; 162 1418-1430.  
859 doi:10.1016/j.cell.2015.08.014.

860 Parker NF, Cameron CM, Taliaferro JP et al. Reward and choice encoding in terminals  
861 of midbrain dopamine neurons depends on striatal target. *Nat Neurosci*. 2016; 19  
862 845-854. doi:10.1038/nn.4287. PMCID: PMC4882228.

863 Patriarchi T, Cho JR, Merten K et al. Ultrafast neuronal imaging of dopamine dynamics  
864 with designed genetically encoded sensors. *Science*. 2018; 360(6396)  
865 doi:10.1126/science.aat4422.

866 Pohar SL, Allyson Jones C. The burden of Parkinson disease (PD) and concomitant  
867 comorbidities. *Arch Gerontol Geriatr*. 2009; 49(2) 317-321.  
868 doi:10.1016/j.archger.2008.11.006. PubMed PMID: 19135266.

869 Ryan MB, Bair-Marshall C, Nelson AB. Aberrant Striatal Activity in Parkinsonism and  
870 Levodopa-Induced Dyskinesia. *Cell Rep*. 2018; 23(12) 3438-3446.e5.  
871 doi:10.1016/j.celrep.2018.05.059.

872 Salamone JD, Correa M. The mysterious motivational functions of mesolimbic  
873 dopamine. *Neuron*. 2012; 76 470-485. doi:10.1016/j.neuron.2012.10.021. PMCID:  
874 PMC4450094.

875 Saunders BT, Richard JM, Margolis EB, Janak PH. Dopamine neurons create Pavlovian  
876 conditioned stimuli with circuit-defined motivational properties. *Nat Neurosci*. 2018;  
877 21(8) 1072-1083. doi:10.1038/s41593-018-0191-4. PMCID: PMC6082399.

- 878 Schultz W, Ruffieux A, Aebischer P. The activity of pars compacta neurons of the  
879 monkey substantia nigra in relation to motor activation. *Experimental Brain*  
880 *Research*. 1983; 51(3) 377-387. doi:10.1007/BF00237874.
- 881 Schultz W. Recent advances in understanding the role of phasic dopamine activity.  
882 *F1000Res*. 2019; 8 doi:10.12688/f1000research.19793.1. PubMed PMID:  
883 31588354. PMCID: PMC6760455.
- 884 Sebastianutto I, Maslava N, Hopkins CR, Cenci MA. Validation of an improved scale for  
885 rating L-DOPA-induced dyskinesia in the mouse and effects of specific dopamine  
886 receptor antagonists. *Neurobiol Dis*. 2016; 96 156-170.  
887 doi:10.1016/j.nbd.2016.09.001. PubMed PMID: 27597526.
- 888 Shen W, Flajolet M, Greengard P, Surmeier DJ. Dichotomous dopaminergic control of  
889 striatal synaptic plasticity. *Science*. 2008; 321 848-851.  
890 doi:10.1126/science.1160575.
- 891 Tobler PN, Fiorillo CD, Schultz W. Adaptive coding of reward value by dopamine  
892 neurons. *Science*. 2005; 307 1642-1645. doi:10.1126/science.1105370.
- 893 Whishaw IQ, O'connor WT, Dunnett SB. The contributions of motor cortex, nigrostriatal  
894 dopamine and caudate-putamen to skilled forelimb use in the rat. *Brain*. 1986; 109  
895 805-843.
- 896 Whishaw IQ, Pellis SM. The structure of skilled forelimb reaching in the rat: a proximally  
897 driven movement with a single distal rotatory component. *Behavioural Brain*  
898 *Research*. 1990; 41 49-59.
- 899 Whishaw IQ, Suchowersky O, Davis L, Sarna J, Metz GA, Pellis SM. Impairment of  
900 pronation, supination, and body co-ordination in reach-to-grasp tasks in human

901            Parkinson's disease (PD) reveals homology to deficits in animal models. *Behav*  
902            *Brain Res.* 2002; 133 165-176.

903    Whishaw IQ, Whishaw P, Gorny B. The structure of skilled forelimb reaching in the rat:  
904            a movement rating scale. *J Vis Exp.* 2008; doi:10.3791/816. PMCID:  
905            PMC3253566.

906    Yttri EA, Dudman JT. Opponent and bidirectional control of movement velocity in the  
907            basal ganglia. *Nature.* 2016; doi:10.1038/nature17639. PMCID: PMC4873380.

908    Zhang Y, Larcher KM, Misic B, Dagher A. Anatomical and functional organization of the  
909            human substantia nigra and its connections. *Elife.* 2017; 6  
910            doi:10.7554/eLife.26653. PubMed PMID: 28826495. PMCID: PMC5606848.

911

## 912    **Video Captions**

913

914    **Video 1** – Sample reach during the last “retraining” session of a “ChR2-During” rat  
915            showing the direct camera view, the mirror view of the paw dorsum, and 3D skeleton  
916            reconstruction. 2 trailing points are shown for each body part/object. Video is slowed  
917            10x.

918

919    **Video 2** – Sample reach during the seventh “laser on” session for the same rat as in  
920            Video 1 showing the direct camera view, the mirror view of the paw dorsum, and 3D  
921            skeleton reconstruction. 2 trailing points are shown for each body part/object. Video is  
922            slowed 10x.

923

924 **Video 3** – Sample reach during the last “retraining” session of an “Arch-During” rat  
925 showing the direct camera view, the mirror view of the paw dorsum, and 3D skeleton  
926 reconstruction. 2 trailing points are shown for each body part/object. Video is slowed  
927 10x.

928

929 **Video 4** – Sample reach during the tenth “laser on” session for the same rat as in Video  
930 3 showing the direct camera view, the mirror view of the paw dorsum, and 3D skeleton  
931 reconstruction. While the reaches in Videos 3 and 4 are superficially similar, the rat  
932 reaches further past the pellet after repeated dopamine neuron inhibition. 2 trailing  
933 points are shown for each body part/object. Video is slowed 10x.

934

935 **Video 5** – Sample reaches from a rat that received “during reach” stimulation in  
936 alternating trial blocks demonstrating that kinematic changes induced by dopamine  
937 neuron stimulation are enduring. Reach 1 – at baseline, the rat extends its paw past the  
938 pellet to grasp it. Reach 2 – after several reaches with stimulation, the second digit  
939 extends just to the pellet, which is knocked off the pedestal. Reach 3 – after more  
940 reaches with stimulation, the reach comes far short of the pellet. Reach 4 – with  
941 stimulation off, reach kinematics return to baseline. Reach 5 – on the next reach,  
942 stimulation is reinstated and kinematics are markedly abnormal.

943

944 **Video 6** – Context-dependent AIMs. ChR2-injected rat showing AIMs (axial and limb  
945 dyskinesias) with dopamine neuron stimulation during the second day of AIMs testing.

- 946 The same rat does not show AIMS when receiving the same stimulation parameters
- 947 (estimated 20 mW at the fiber tip, 20 Hz) during a reach.



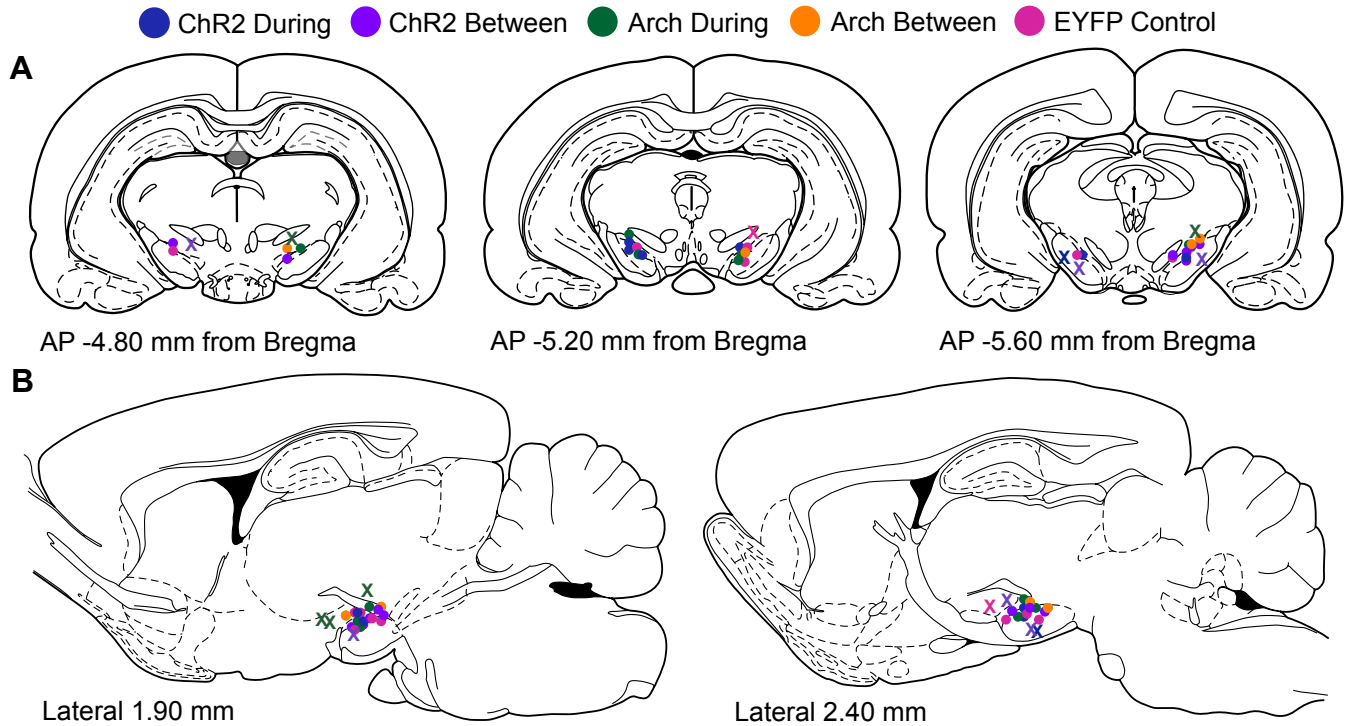

**Figure 1 – figure supplement 1.** Optical fiber locations. **(A)** Circles indicate optical fiber tip locations in rats analyzed from each group superimposed on coronal rat brain atlas images (Paxinos and Watson 1998). X's indicate optical fiber tip locations of rats excluded from the analysis due to either fiber misplacement or lack of opsin expression (see Materials and Methods). **(B)** Optical fiber tip locations superimposed on sagittal rat brain atlas images.

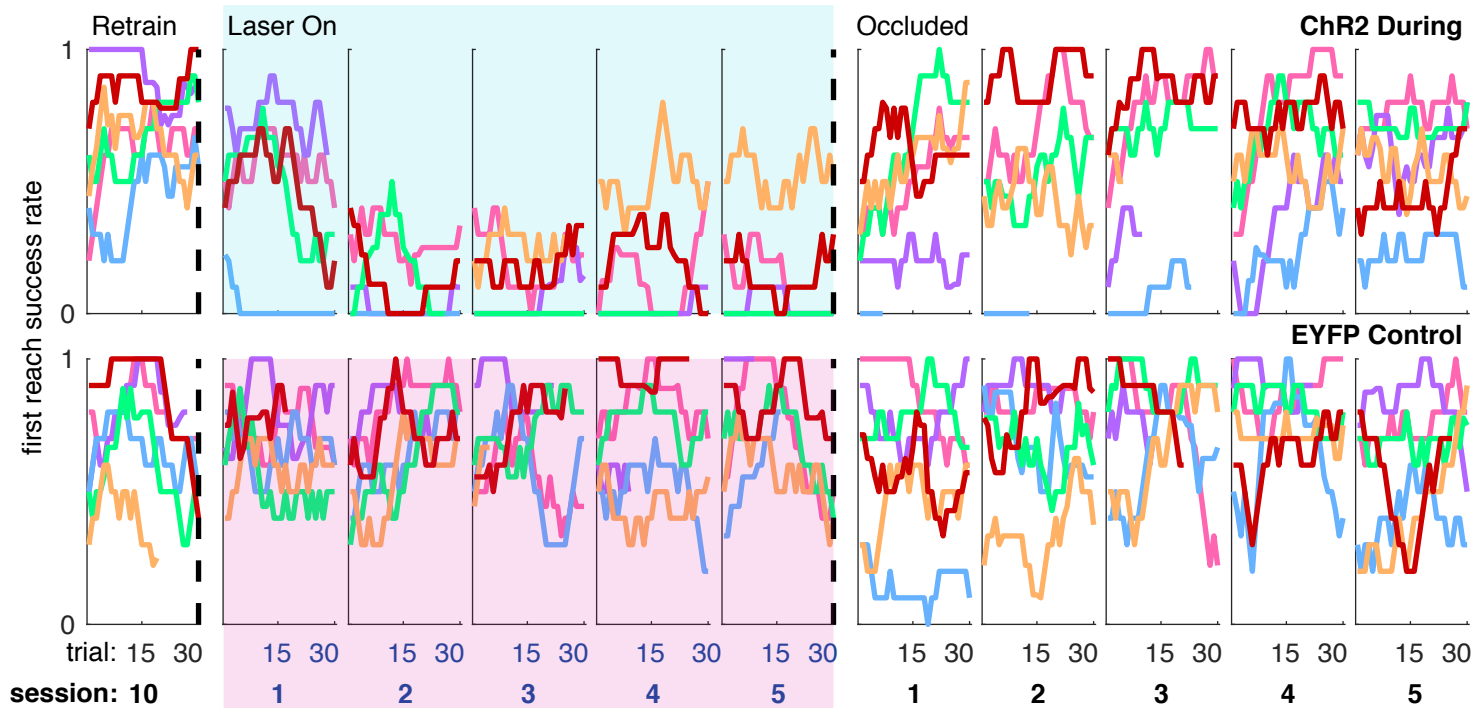

**Figure 2 – figure supplement 1.** Moving average of success rate within individual sessions (ChR2 During and EYFP) for each rat. Each colored line represents the same rat across panels.

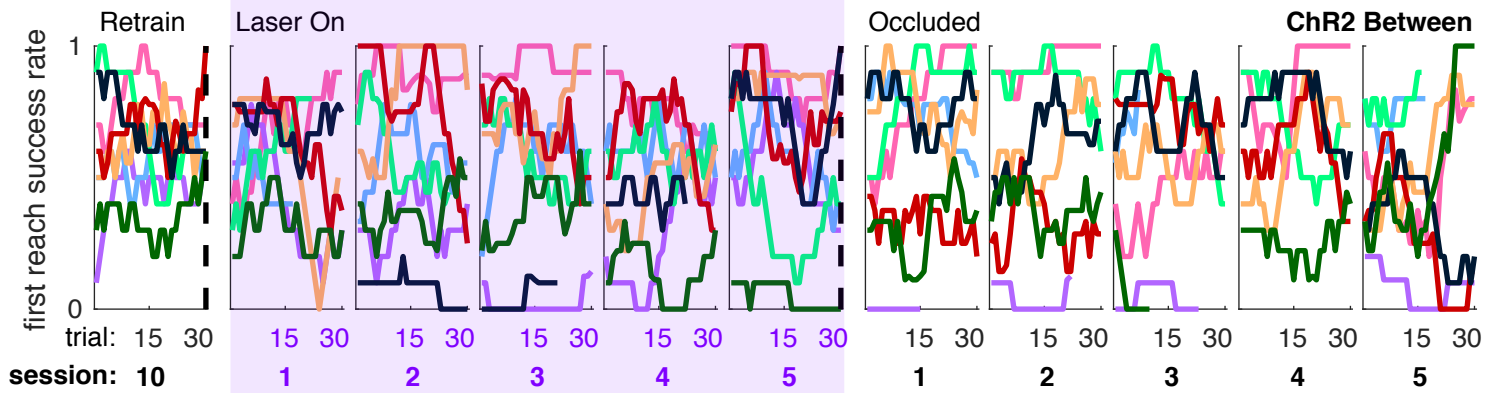

**Figure 3 – figure supplement 1.** Individual rat data for moving average of success rate across trials within individual sessions (“ChR2 Between”). Each colored line represents the same rat across panels.

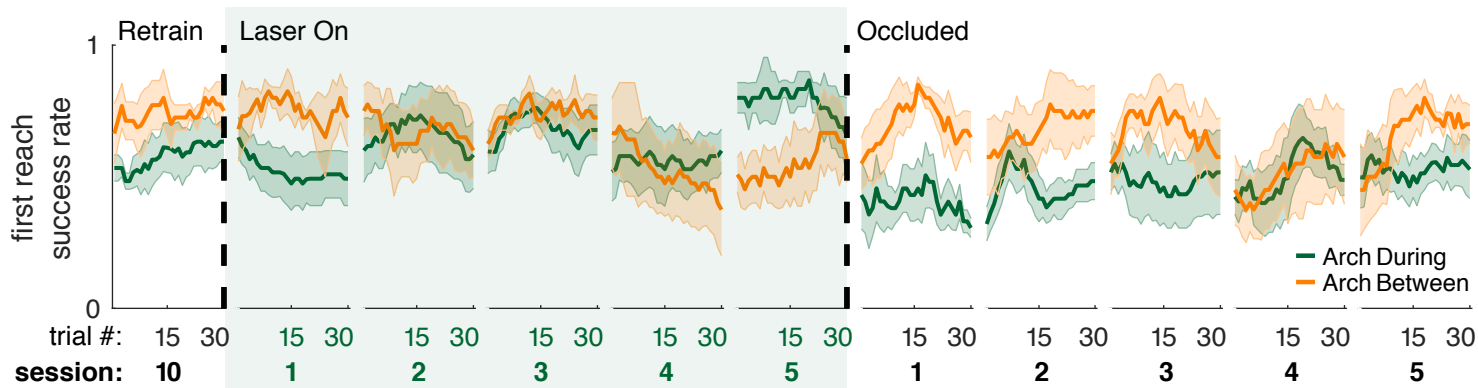

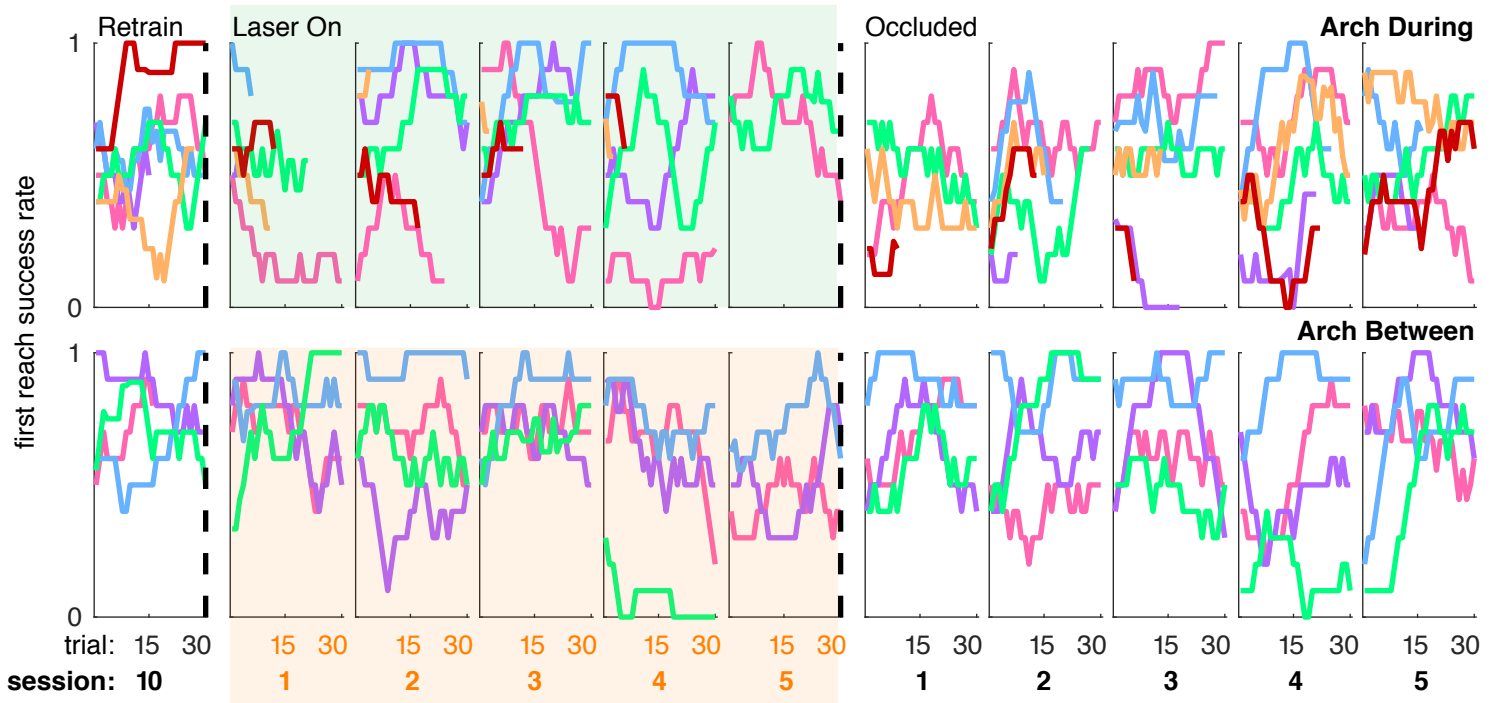

**Figure 4 – figure supplement 2.** Individual rat data for moving average of success rate across trials within individual sessions (“Arch During” and “Arch Between”). Each colored line represents the same rat across panels.

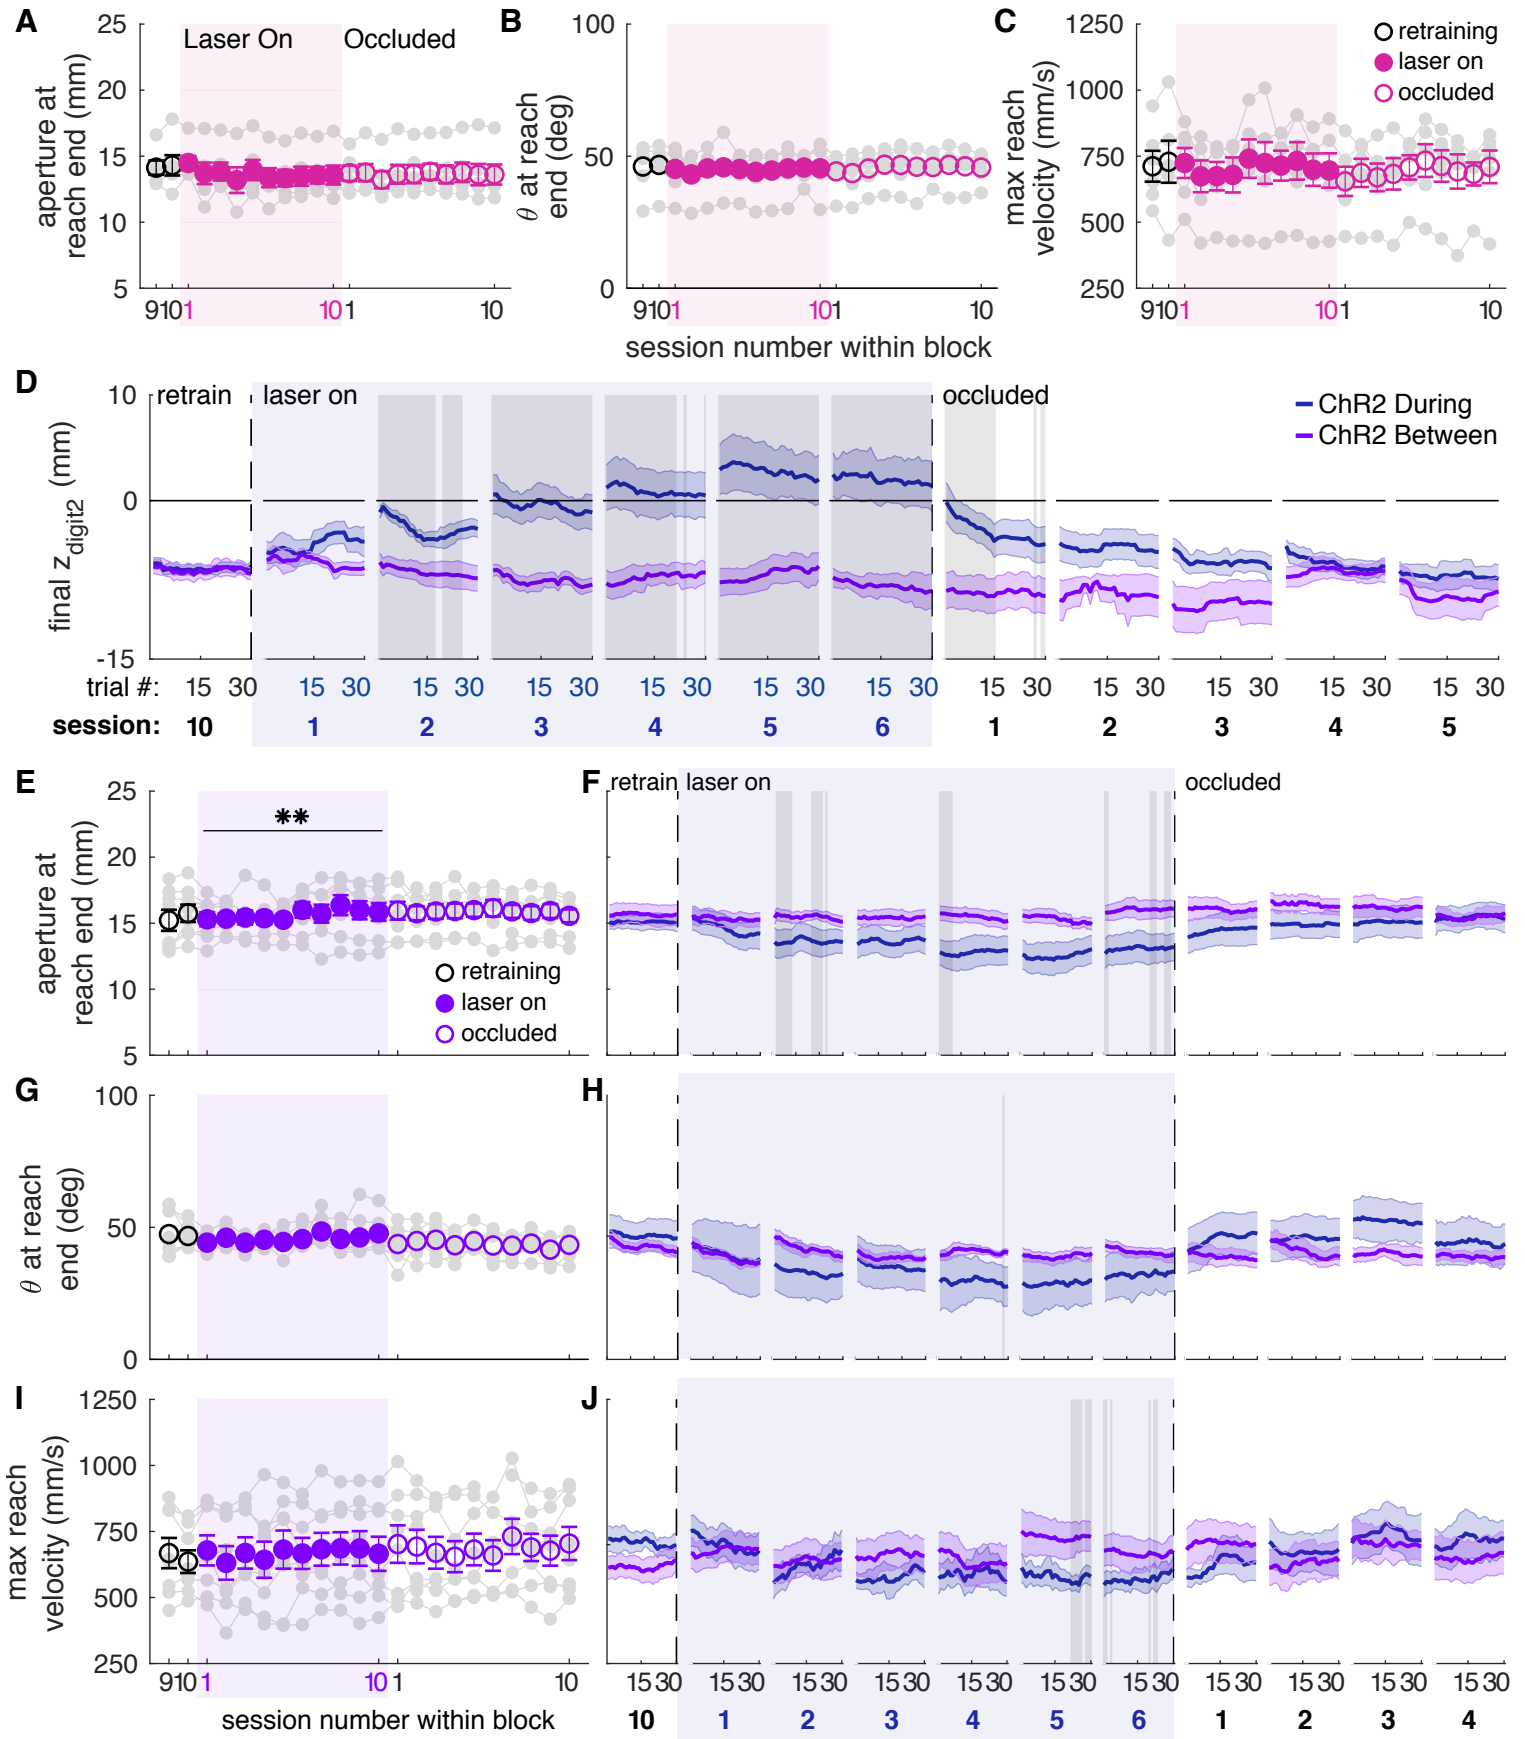

**Figure 6 – figure supplement 1.** Reach-to-grasp kinematics do not change in EYFP control rats or ChR2-injected rats receiving between reach stimulation. **(A)** Average grasp aperture in EYFP control rats. Grey lines represent individual rats. Linear mixed model: effect of laser:  $t(48) = -0.16$ ,  $P = 0.88$ ; interaction between laser and session:  $t(585) = -1.14$ ,  $P = 0.26$ . **(B)** Same as (A) but for paw orientation. Linear mixed model: effect of laser:  $t(75) = -0.65$ ,  $P = 0.52$ ; interaction between laser and session:  $t(585) = 0.47$ ,  $P = 0.64$ . **(C)** Same as (A) and (B) but for maximum reach velocity. Linear mixed model: effect of laser:  $t(49) = -0.23$ ,  $P = 0.82$ ; interaction between laser and session:  $t(585) = 0.72$ ,  $P = 0.47$ . **(D)** Moving average of maximum reach extent for “between reach” stimulation within the last “retraining” session, first 6 “laser on” sessions, and first 5 “occlusion” sessions. Grey shaded areas represent trials with a statistically significant difference between groups (Wilcoxon rank sum test,  $P < 0.01$ ). Data for “during reach” stimulation from Figure 6D are shown for comparison. **(E)** Average grasp aperture for “between reach” stimulation. Linear mixed model: effect of laser:  $t(48) = -0.60$ ,  $P = 0.55$ ; interaction between laser and session:  $t(585) = 2.59$ ,  $P = 9.76 \times 10^{-3}$ . **(F)** Moving average of aperture at grasp end within the last “retraining” session, first 6 “laser on” sessions, and first 4 “occlusion” sessions. Grey shaded areas represent trials with a statistically significant difference between groups (Wilcoxon rank sum test,  $P < 0.01$ ). **(G)** Same as (E) for paw orientation. Linear mixed model: effect of laser:  $t(74) = -0.67$ ,  $P = 0.51$ ; interaction between laser and session:  $t(585) = 1.85$ ,  $P = 0.06$ . **(H)** Moving average of paw angle at grasp end within the last “retraining” session, first 6 “laser on” sessions, and first 4 “occlusion” sessions. Grey shaded areas represent trials with a statistically significant difference between groups (Wilcoxon rank sum test,  $P < 0.01$ ). **(I)** Same as (E) and (G) for maximum reach velocity. Linear mixed model: effect of laser:  $t(49) = 0.17$ ,  $P = 0.87$ ; interaction between laser and session:  $t(585) = -0.43$ ,  $P = 0.67$ . **(J)** Moving average of maximum reach velocity within the last “retraining” session, first 6 “laser on” sessions, and first 4 “occlusion” sessions. Shaded colored areas in D, F, H, J and error bars in A, B, C, E, G, I represent s.e.m. \*\* indicates  $p < 0.01$  for the laser-session interaction term in panel E.



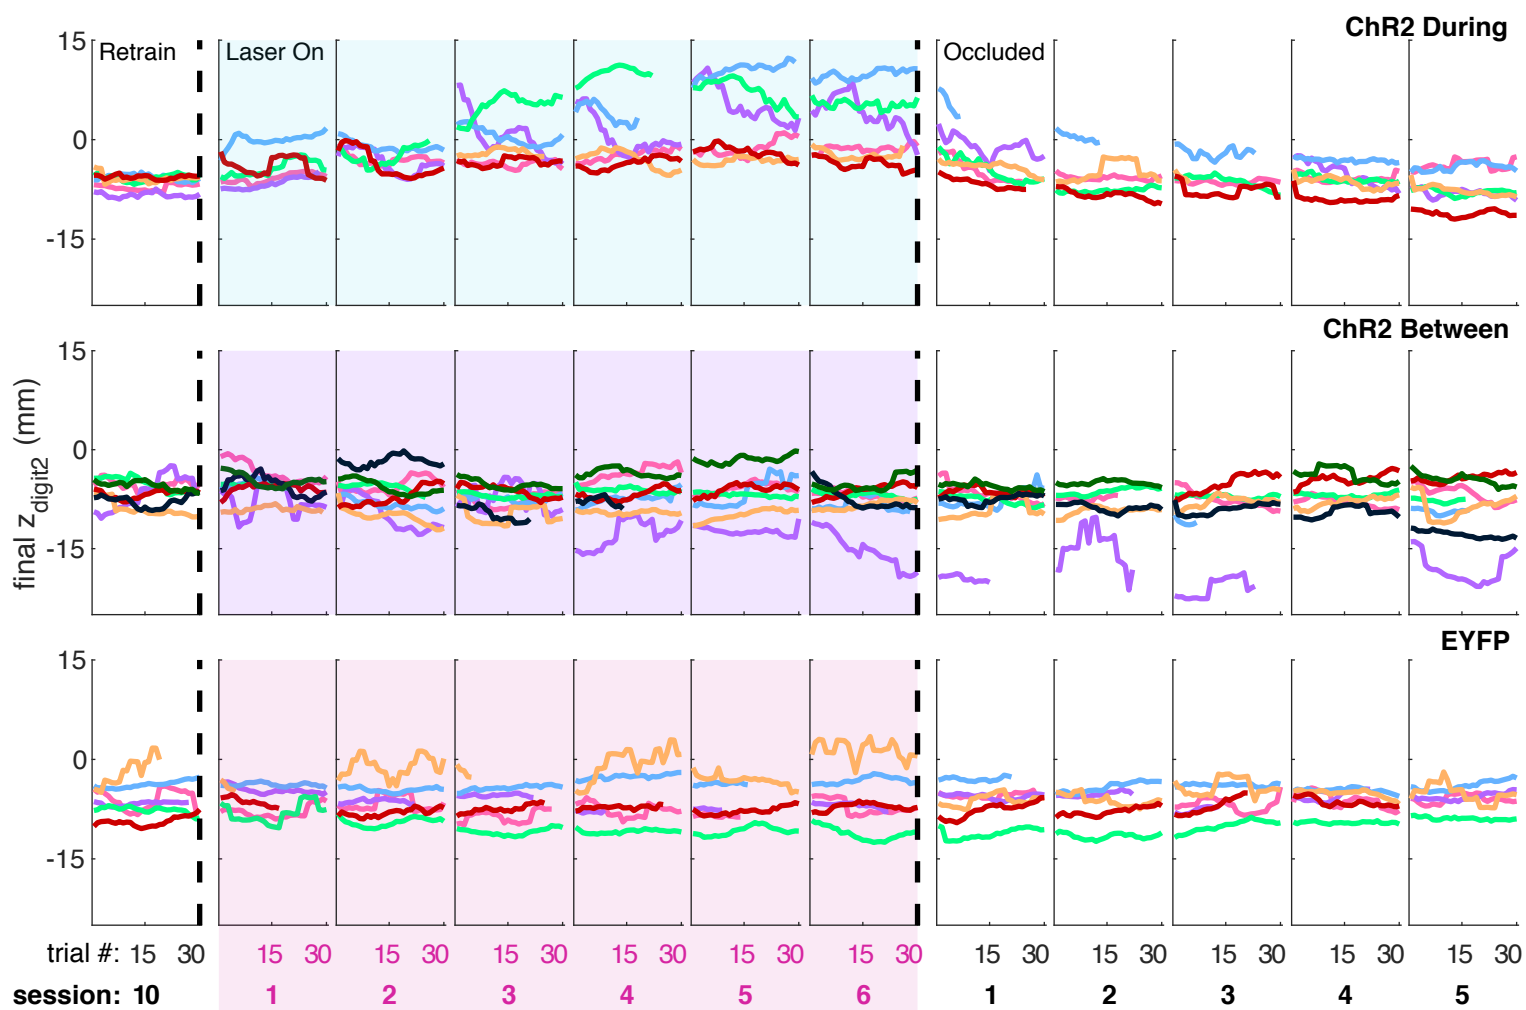

**Figure 6 – figure supplement 2.** Individual rat data for moving average of maximum reach extent across trials within individual sessions (“ChR2 During”, “ChR2 Between” and “EYFP”). Each colored line represents the same rat across panels.

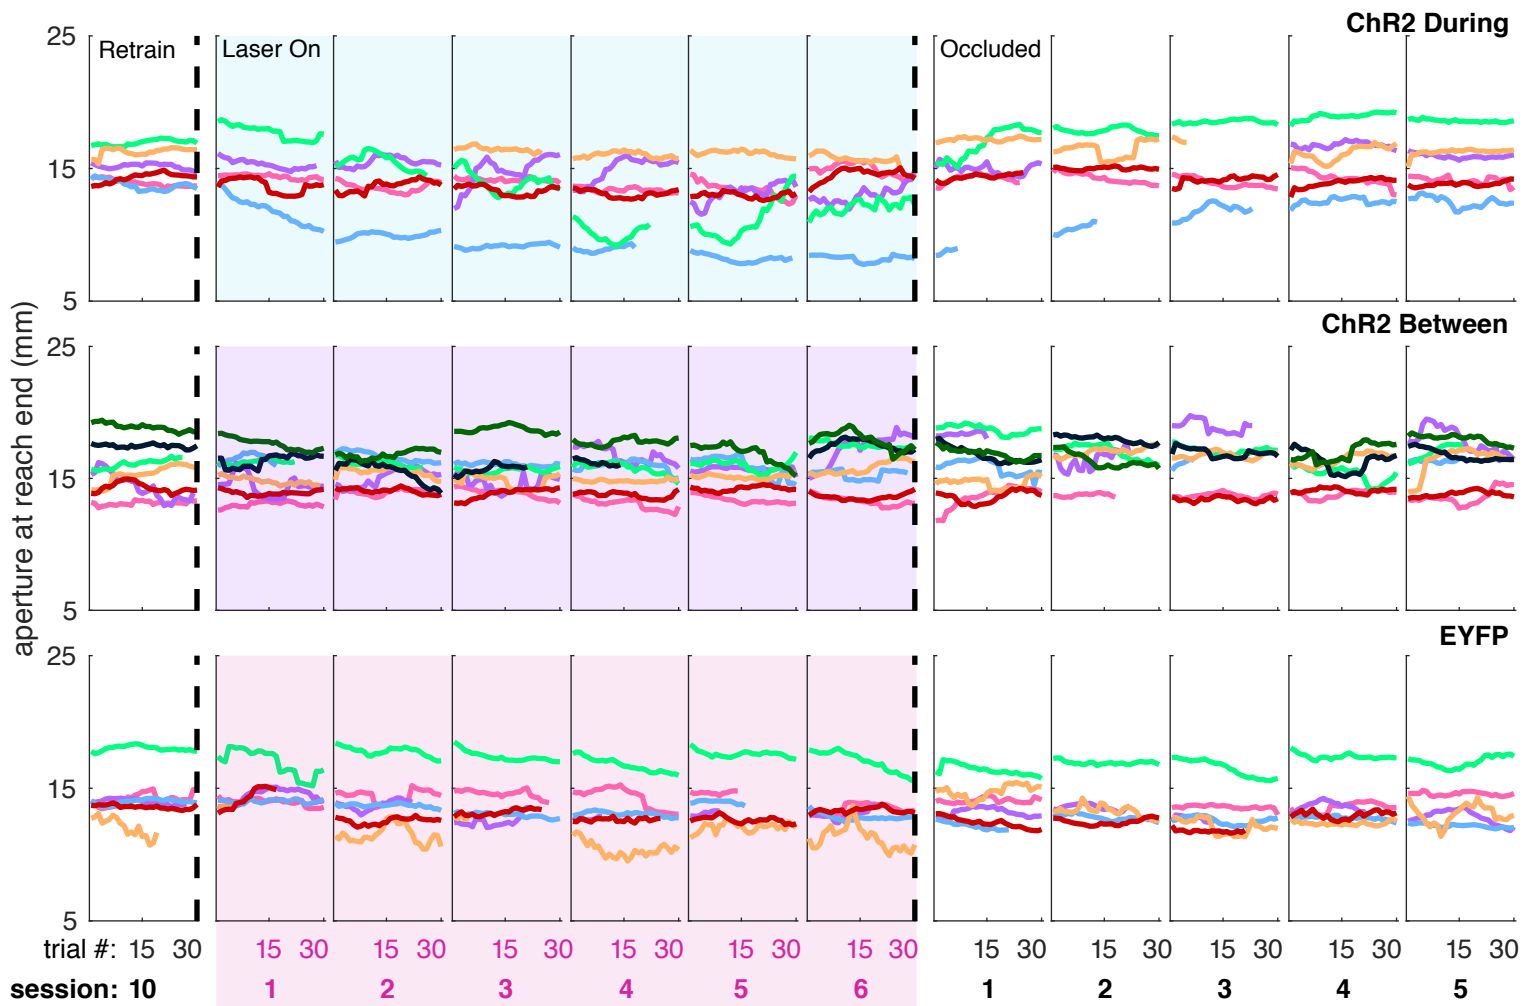

**Figure 6 – figure supplement 3.** Individual rat data for moving average of grasp aperture across trials within individual sessions (“ChR2 During”, “ChR2 Between” and “EYFP”). Each colored line represents the same rat across panels.

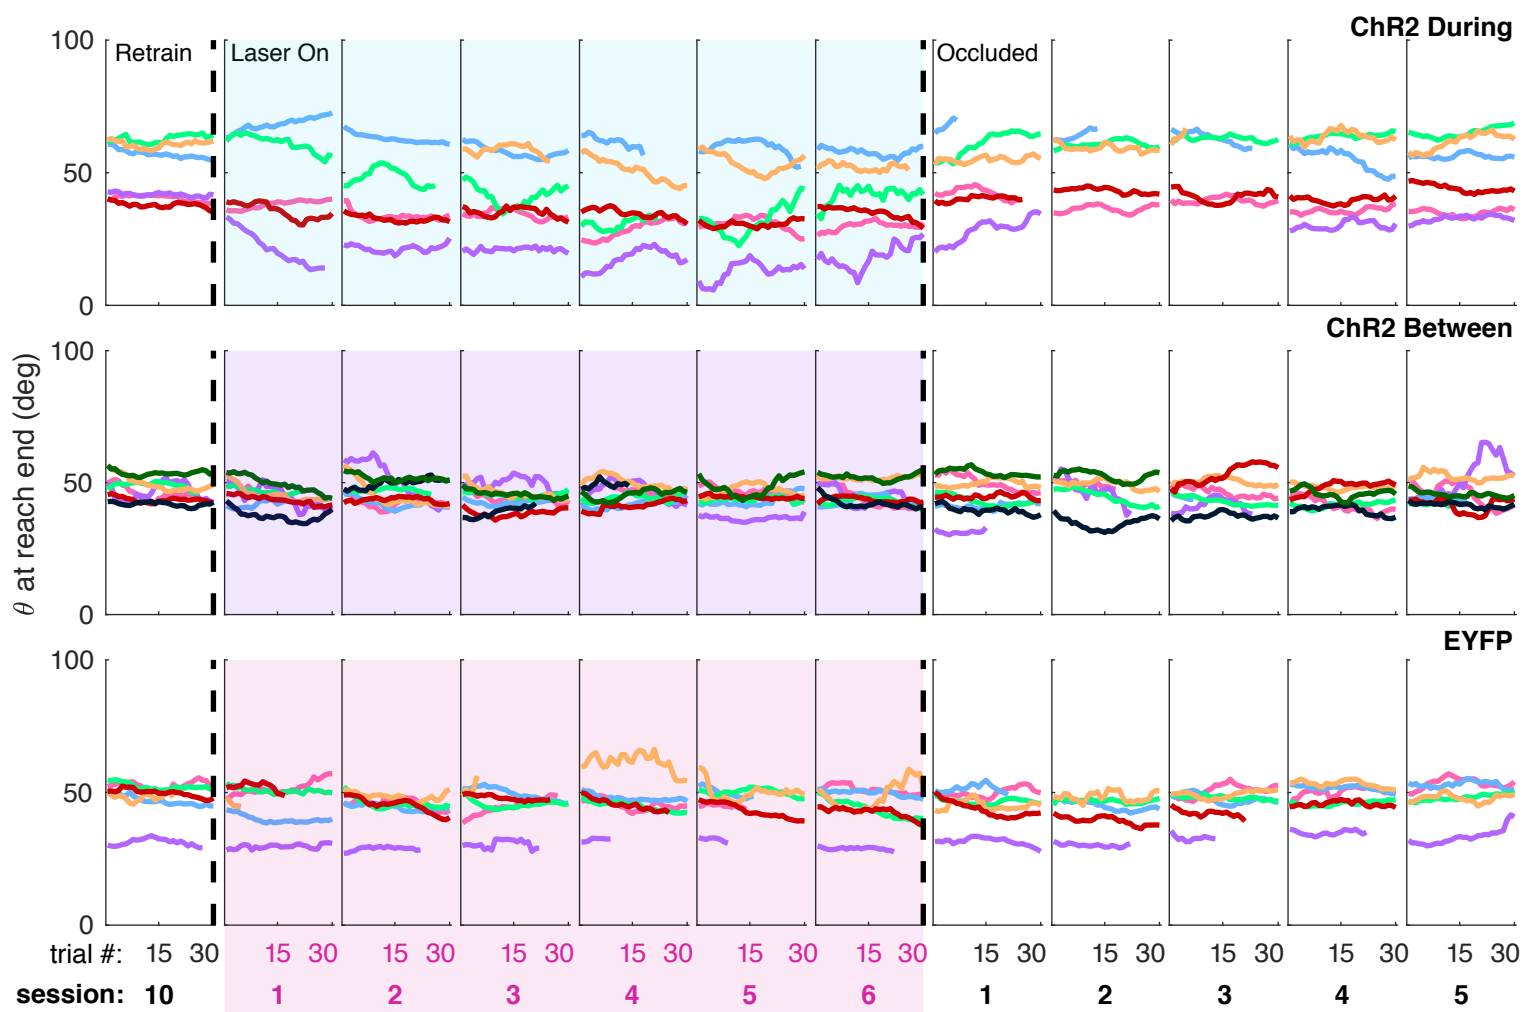

**Figure 6 – figure supplement 4.** Individual rat data for moving average of paw angle across trials within individual sessions (“ChR2 During”, “ChR2 Between” and “EYFP”). Each colored line represents the same rat across panels.

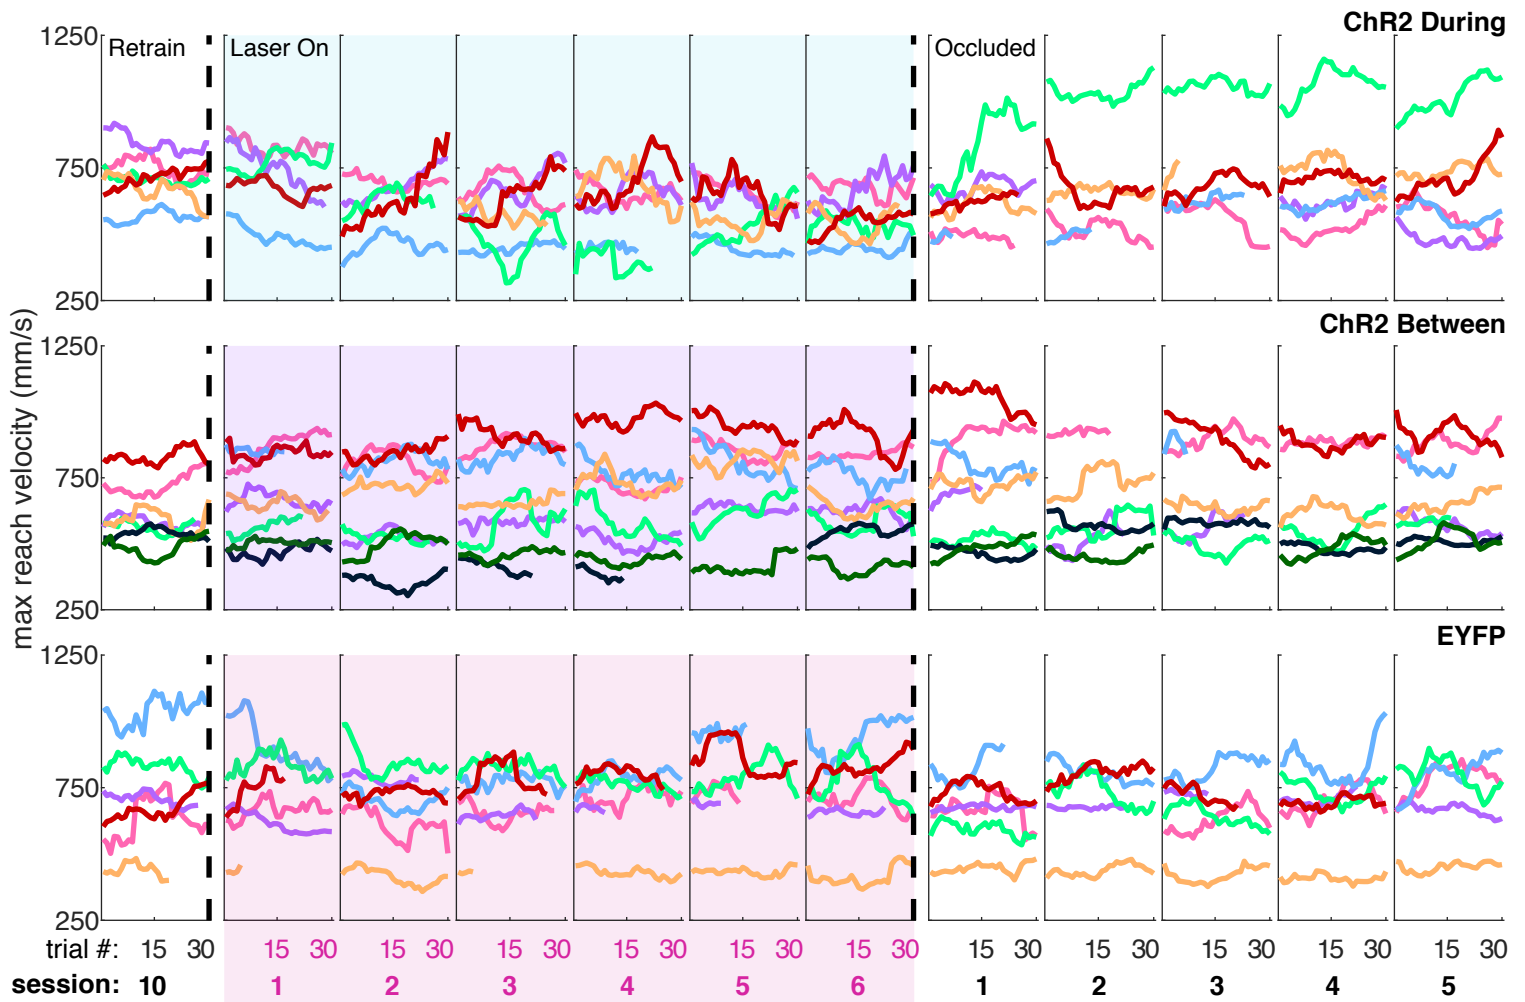

**Figure 6 – figure supplement 5.** Individual rat data for moving average of maximum reach velocity across trials within individual sessions (“ChR2 During”, “ChR2 Between” and “EYFP”). Each colored line represents the same rat across panels.

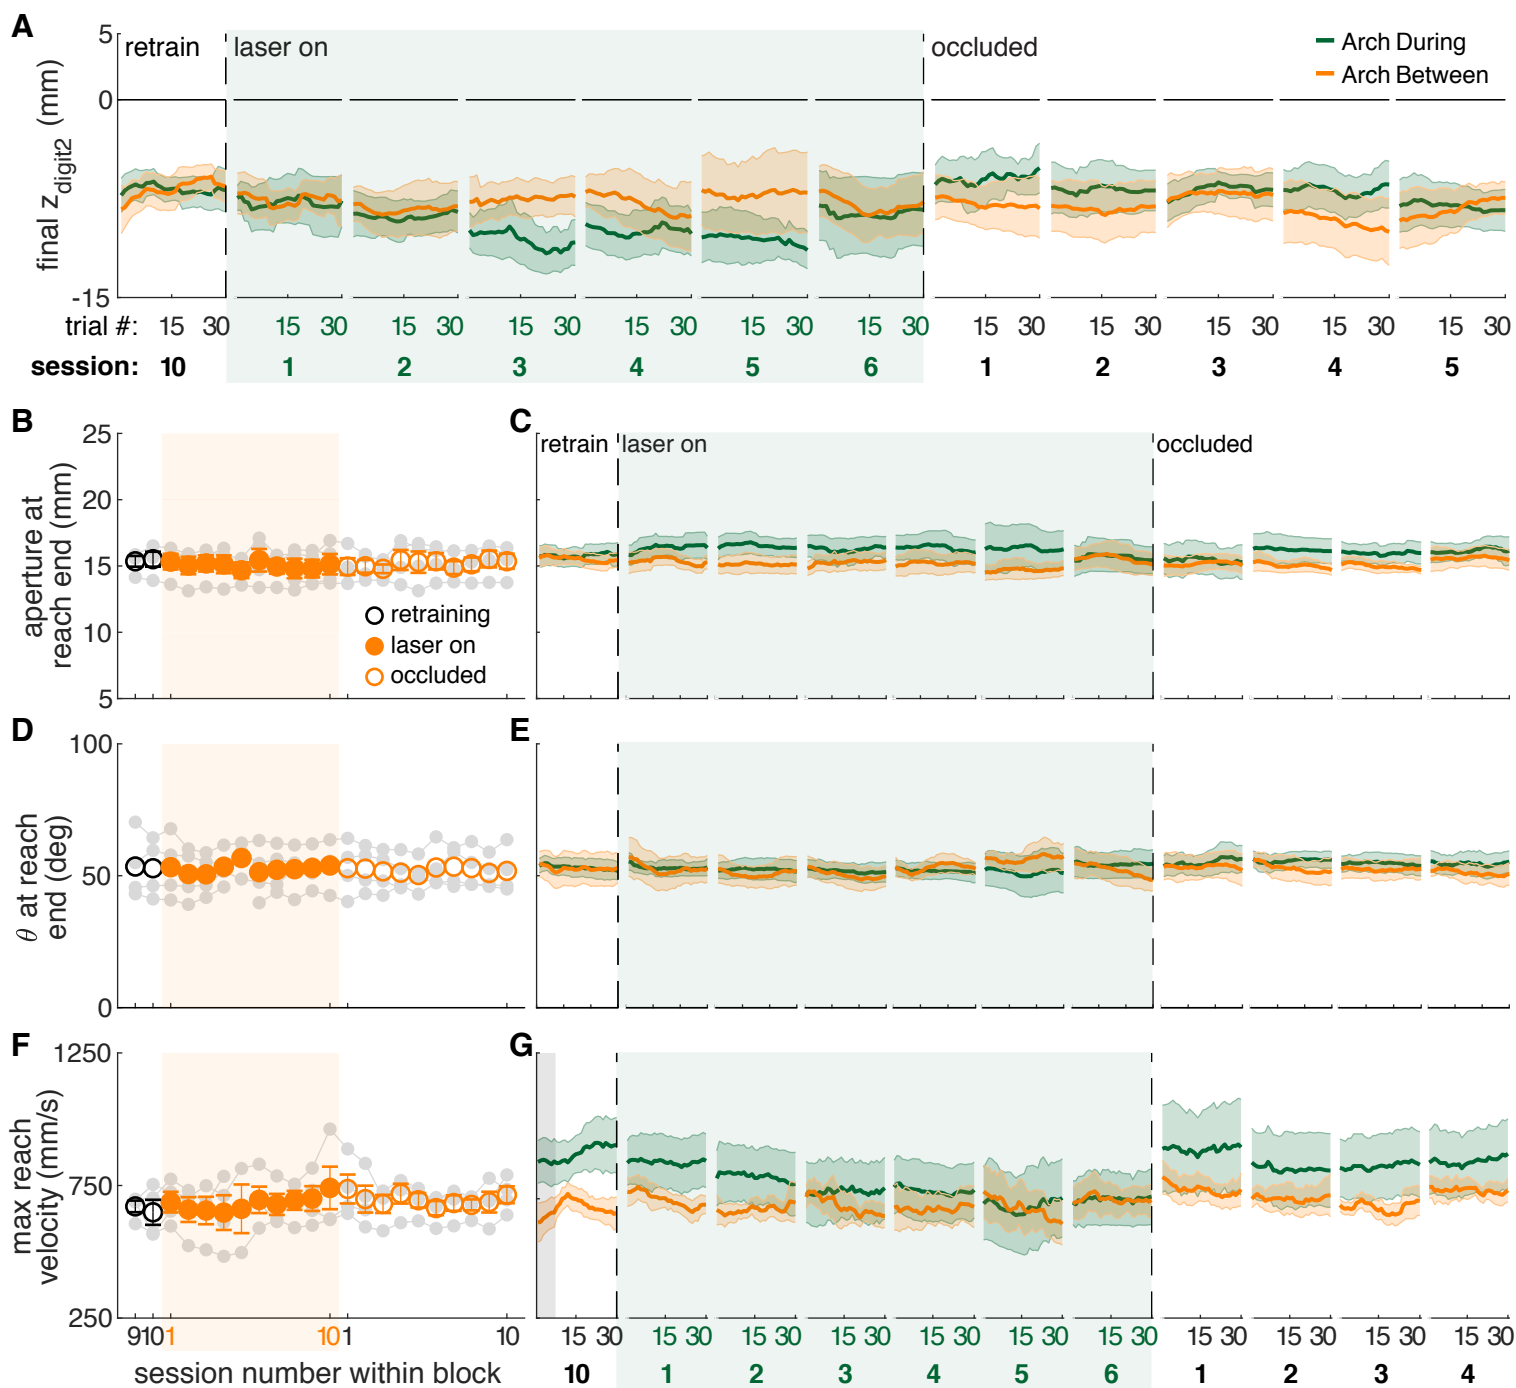

**Figure 7 – figure supplement 1.** Reach-to-grasp kinematics do not change with dopamine neuron inhibition between reaches. **(A)** Moving average of maximum reach extent for “between reach” inhibition within the last “retraining” session, first 6 “laser on” sessions, and first 5 “occlusion” sessions. Data for “during reach” inhibition from Figure 7C are shown here for comparison. **(B)** Average aperture at reach end for “between reach” inhibition. Linear mixed model: effect of laser:  $t(48) = 0.05$ ,  $P = 0.96$ ; interaction between laser and session:  $t(585) = 0.26$ ,  $P = 0.80$ . **(C)** Moving average of aperture at reach end for “between reach” inhibition within the last “retraining” session, first 6 “laser on” sessions, and first 4 “occlusion” sessions. **(D)** Same as (B) for paw orientation: effect of laser:  $t(75) = -0.11$ ,  $P = 0.91$ ; interaction between laser and session:  $t(585) = 0.50$ ,  $P = 0.62$ . **(E)** Moving average of paw angle at reach end for “between reach” inhibition within the last “retraining” session, first 6 “laser on” sessions, and first 4 “occlusion” sessions. **(F)** Same as (B) and (D) for maximum reach velocity: effect of laser:  $t(49) = -0.19$ ,  $P = 0.85$ ; interaction between laser and session:  $t(585) = 0.49$ ,  $P = 0.62$ . **(G)** Moving average of maximum reach velocity at reach end for “between reach” inhibition within the last “retraining” session, first 6 “laser on” sessions, and first 4 “occlusion” sessions. Grey shaded areas represent trials with a statistically significant difference between groups (Wilcoxon rank sum test,  $P < 0.01$ ). Shaded colored areas in A, C, E, G and error bars in B, D, F represent s.e.m.

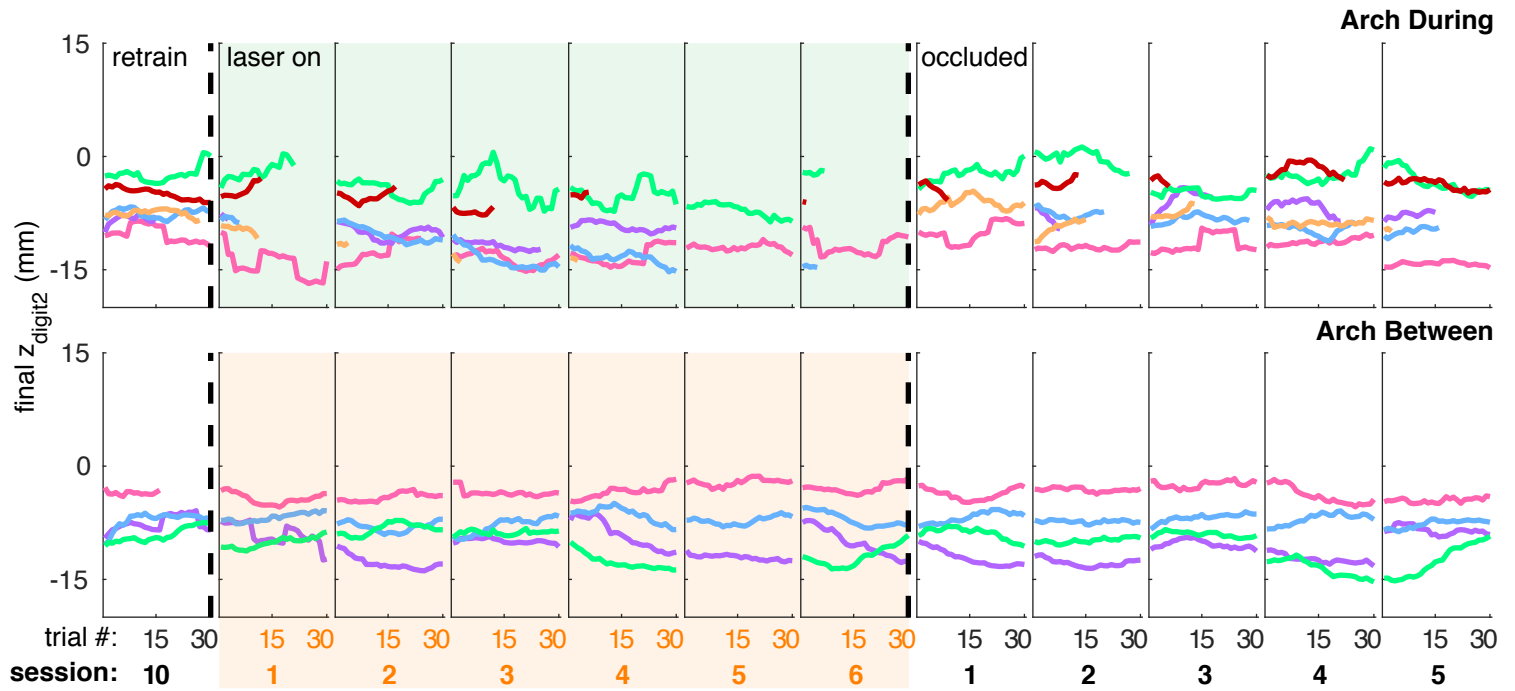

**Figure 7 – figure supplement 2.** Individual rat data for moving average of maximum reach extent within individual sessions (“Arch During” and “Arch Between”). Each colored line represents the same rat across panels.

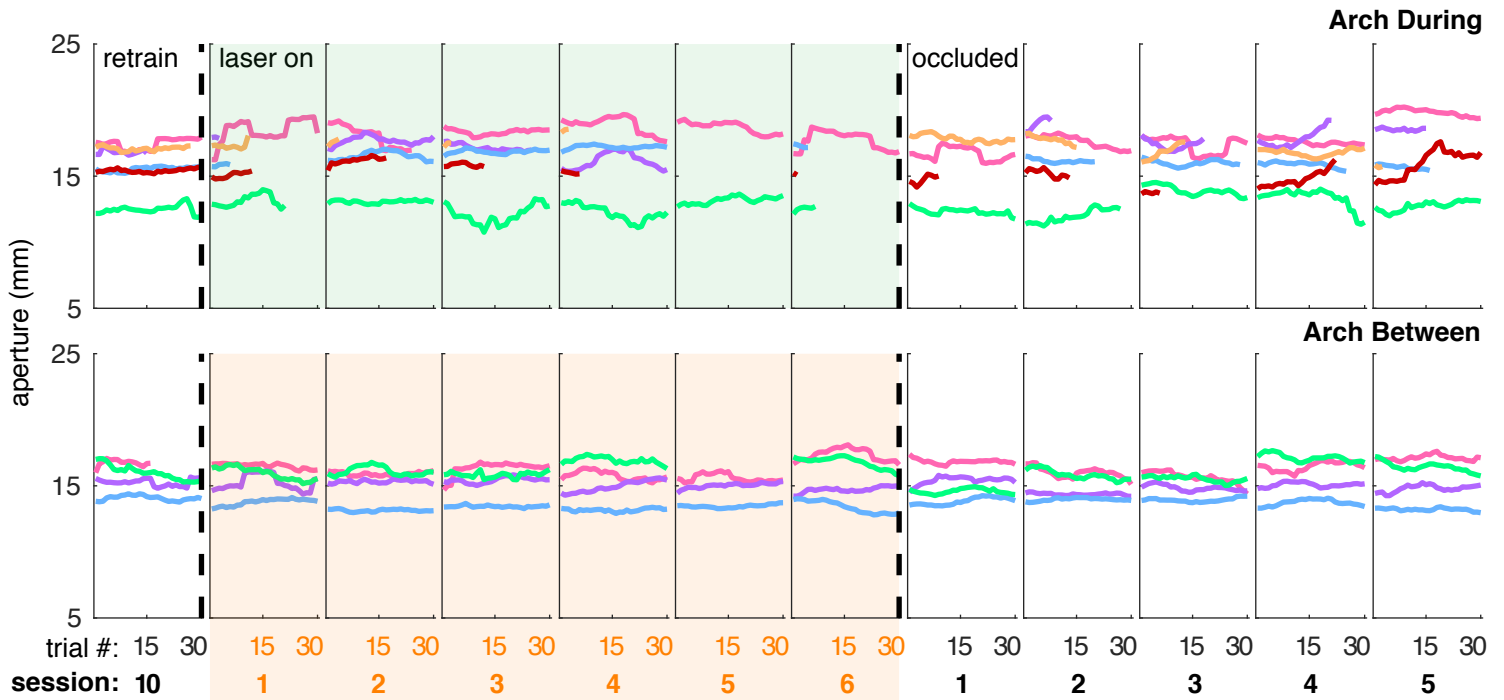

**Figure 7 – figure supplement 3.** Individual rat data for moving average of grasp aperture at reach end within individual sessions ("Arch During" and "Arch Between"). Each colored line represents the same rat across panels.

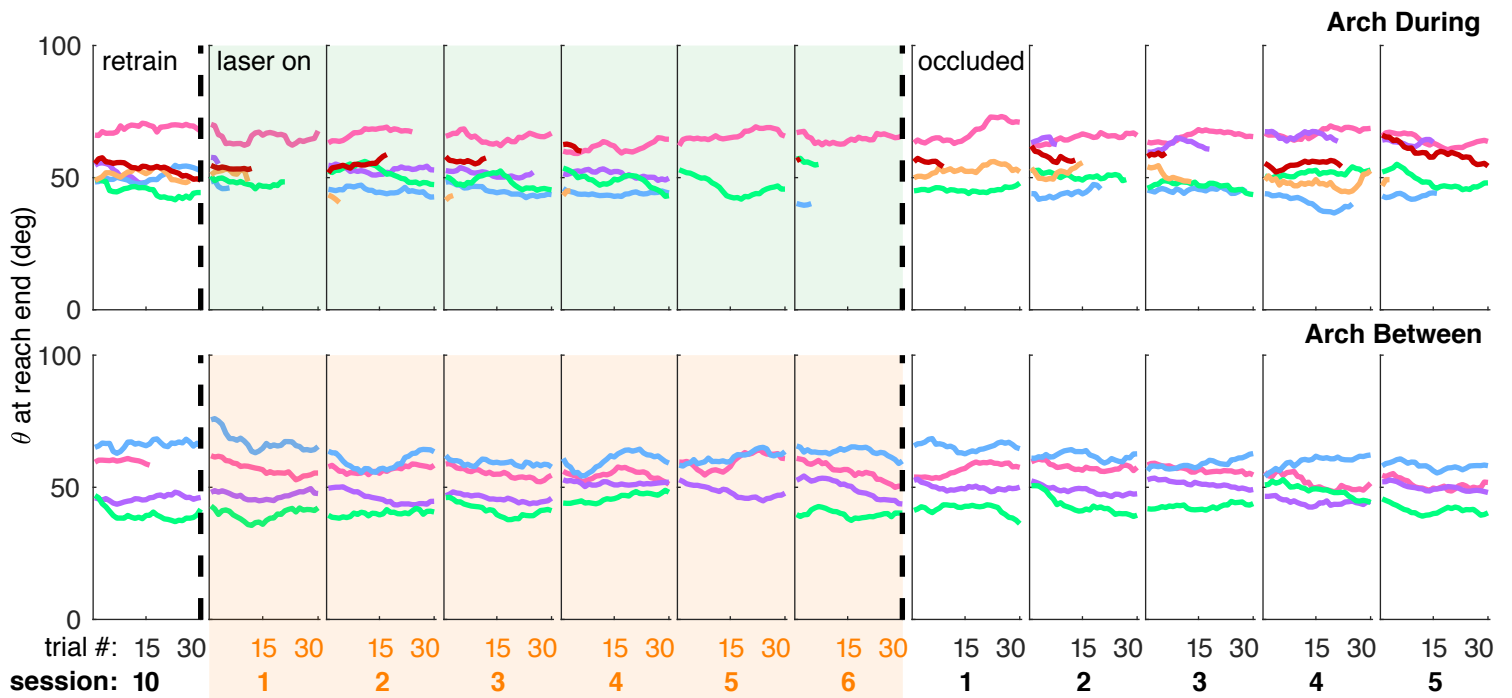



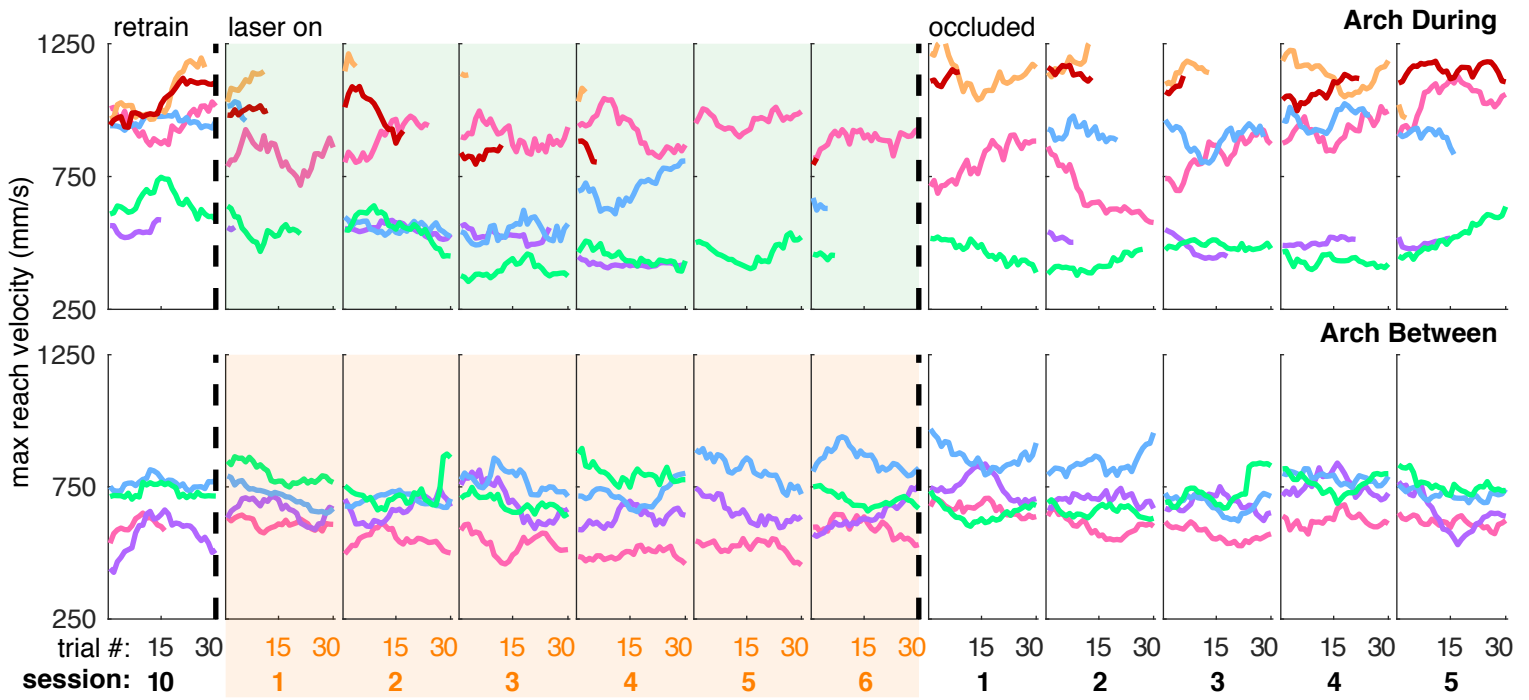

**Figure 7 – figure supplement 5.** Individual rat data for moving average of maximum reach velocity within individual sessions (“Arch During” and “Arch Between”). Each colored line represents the same rat across panels.

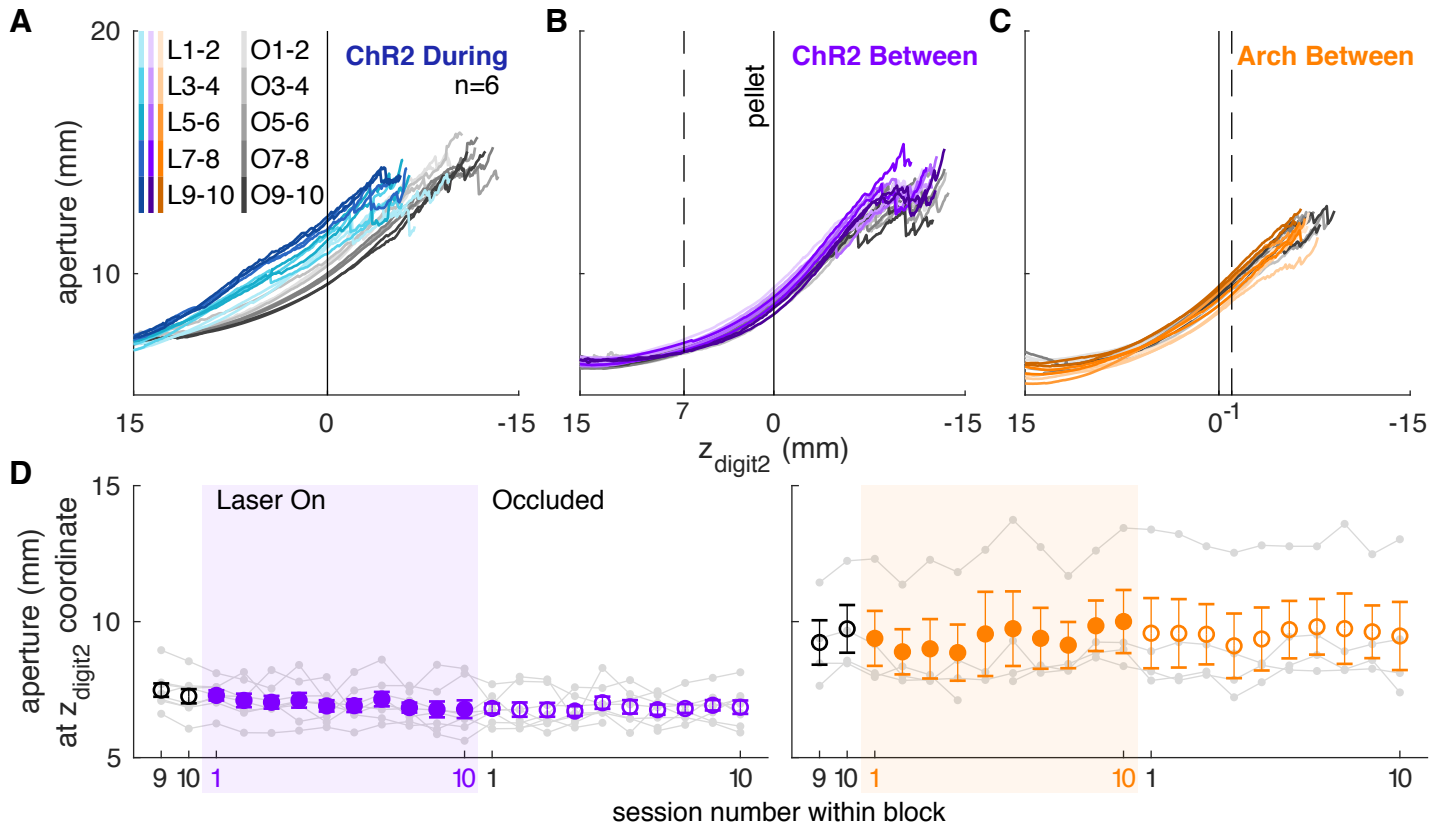

**Figure 9 – figure supplement 1.** Dopamine manipulations between reaches do not affect reach-to-grasp coordination. **(A)** Mean aperture as a function of paw advancement in all “ChR2 During” rats (n = 6). L1-2, O1-2, ... indicate laser on sessions 1-2, occlusion sessions 1-2, etc. **(B)** Mean aperture as a function of paw advancement for “between reach” stimulation. **(C)** Mean aperture as a function of paw advancement for “between reach” inhibition. **(D)** Average aperture at  $z_{digit2}$ -coordinates indicated by dashed lines in (B) and (C) across all sessions. “Between reach” dopamine neuron stimulation did not affect aperture 7 mm from the pellet (linear mixed model: effect of laser:  $t(607) = 0.37$ ,  $P = 0.71$ ; interaction between laser and session:  $t(607) = 0.07$ ,  $P = 0.94$ ) or 1 mm past the pellet (linear mixed model: effect of laser:  $t(607) = 0.53$ ,  $P = 0.60$ ; interaction between laser and session:  $t(607) = -0.56$ ,  $P = 0.58$ ). Dopamine neuron inhibition between reaches did not affect aperture 1 mm past the pellet (linear mixed model: effect of laser:  $t(607) = -0.90$ ,  $P = 0.37$ ; interaction between laser and session:  $t(607) = 1.82$ ,  $P = 0.07$ ).

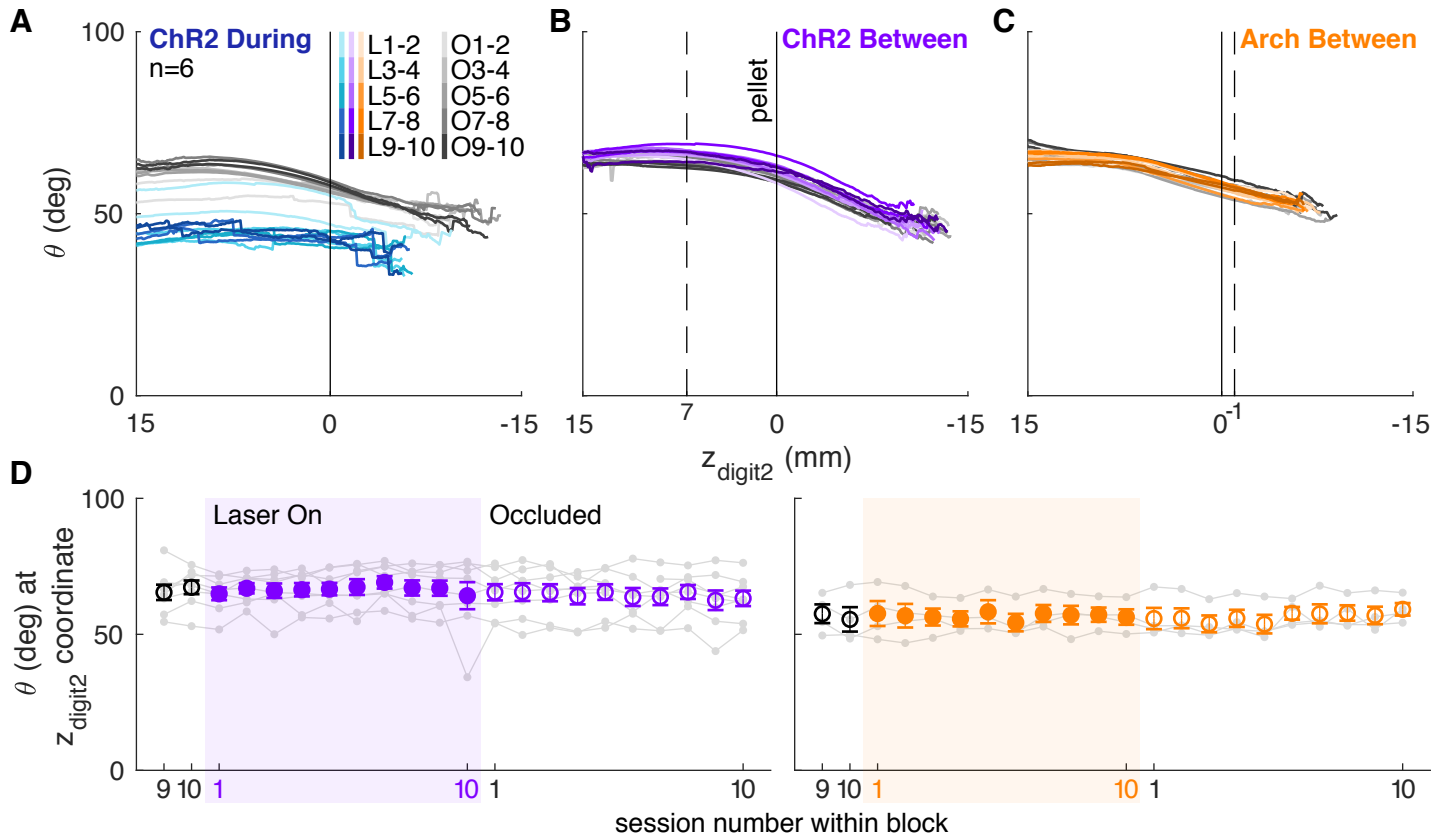

**Figure 9 – figure supplement 2.** Dopamine manipulations between reaches do not affect coordination of reach-to-grasp kinematics (orientation). **(A)** Mean paw orientation as a function of paw advancement in all “ChR2 During” rats ( $n = 6$ ). L1-2, O1-2, ... indicate laser on sessions 1-2, occlusion sessions 1-2, etc. **(B)** Mean paw orientation as a function of paw advancement for “between reach” stimulation. **(C)** Mean paw orientation as a function of paw advancement for “between reach” inhibition. **(D)** Average paw orientation at  $z_{\text{digit2}}$ -coordinates indicated by dashed lines in (B) and (C) across all sessions. “Between reach” dopamine neuron stimulation did not affect paw orientation at 7 mm away from the pellet (linear mixed model: effect of laser:  $t(607) = 0.27$ ,  $P = 0.79$ ; interaction between laser and session:  $t(607) = 0.22$ ,  $P = 0.82$ ) or 1 mm past the pellet (linear mixed model: effect of laser:  $t(607) = -0.41$ ,  $P = 0.68$ ; interaction between laser and session:  $t(607) = 1.17$ ,  $P = 0.24$ ). Dopamine neuron inhibition between reaches did not affect paw orientation at 1 mm past the pellet (linear mixed model: effect of laser:  $t(607) = 0.61$ ,  $P = 0.54$ ; interaction between laser and session:  $t(607) = -0.36$ ,  $P = 0.72$ ).

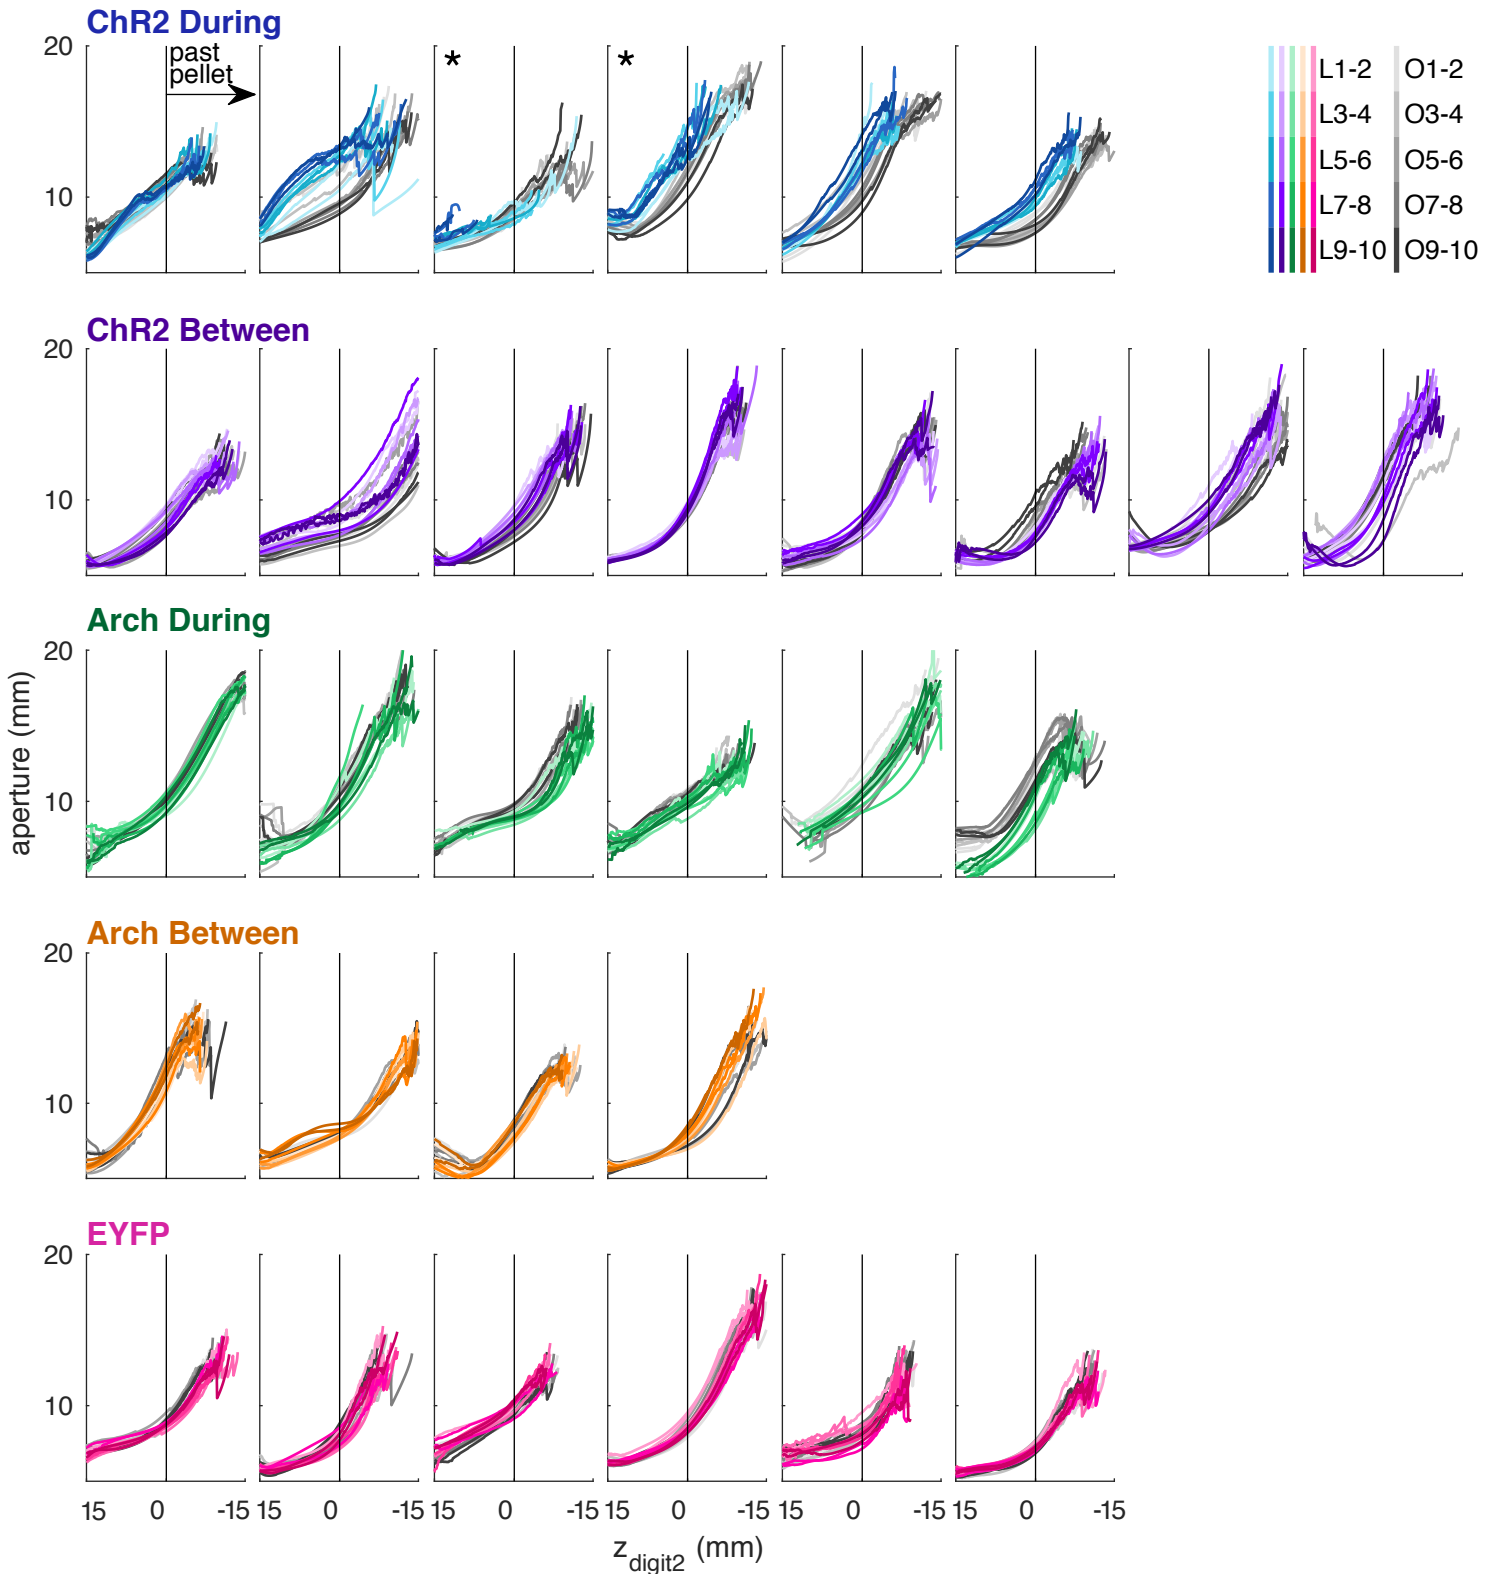

**Figure 9 – figure supplement 3.** Mean aperture as a function of paw advancement for each rat. From top to bottom: ChR2 during reach stimulation, ChR2 between reach stimulation, Arch during reach inhibition, Arch between reach inhibition and EYFP during reach stimulation. \* indicates rats that were excluded from averaged data in Figure 9B (see Methods). In the legend, L1-2, O1-2, ... indicate laser on sessions 1-2, occlusion sessions 1-2, etc.

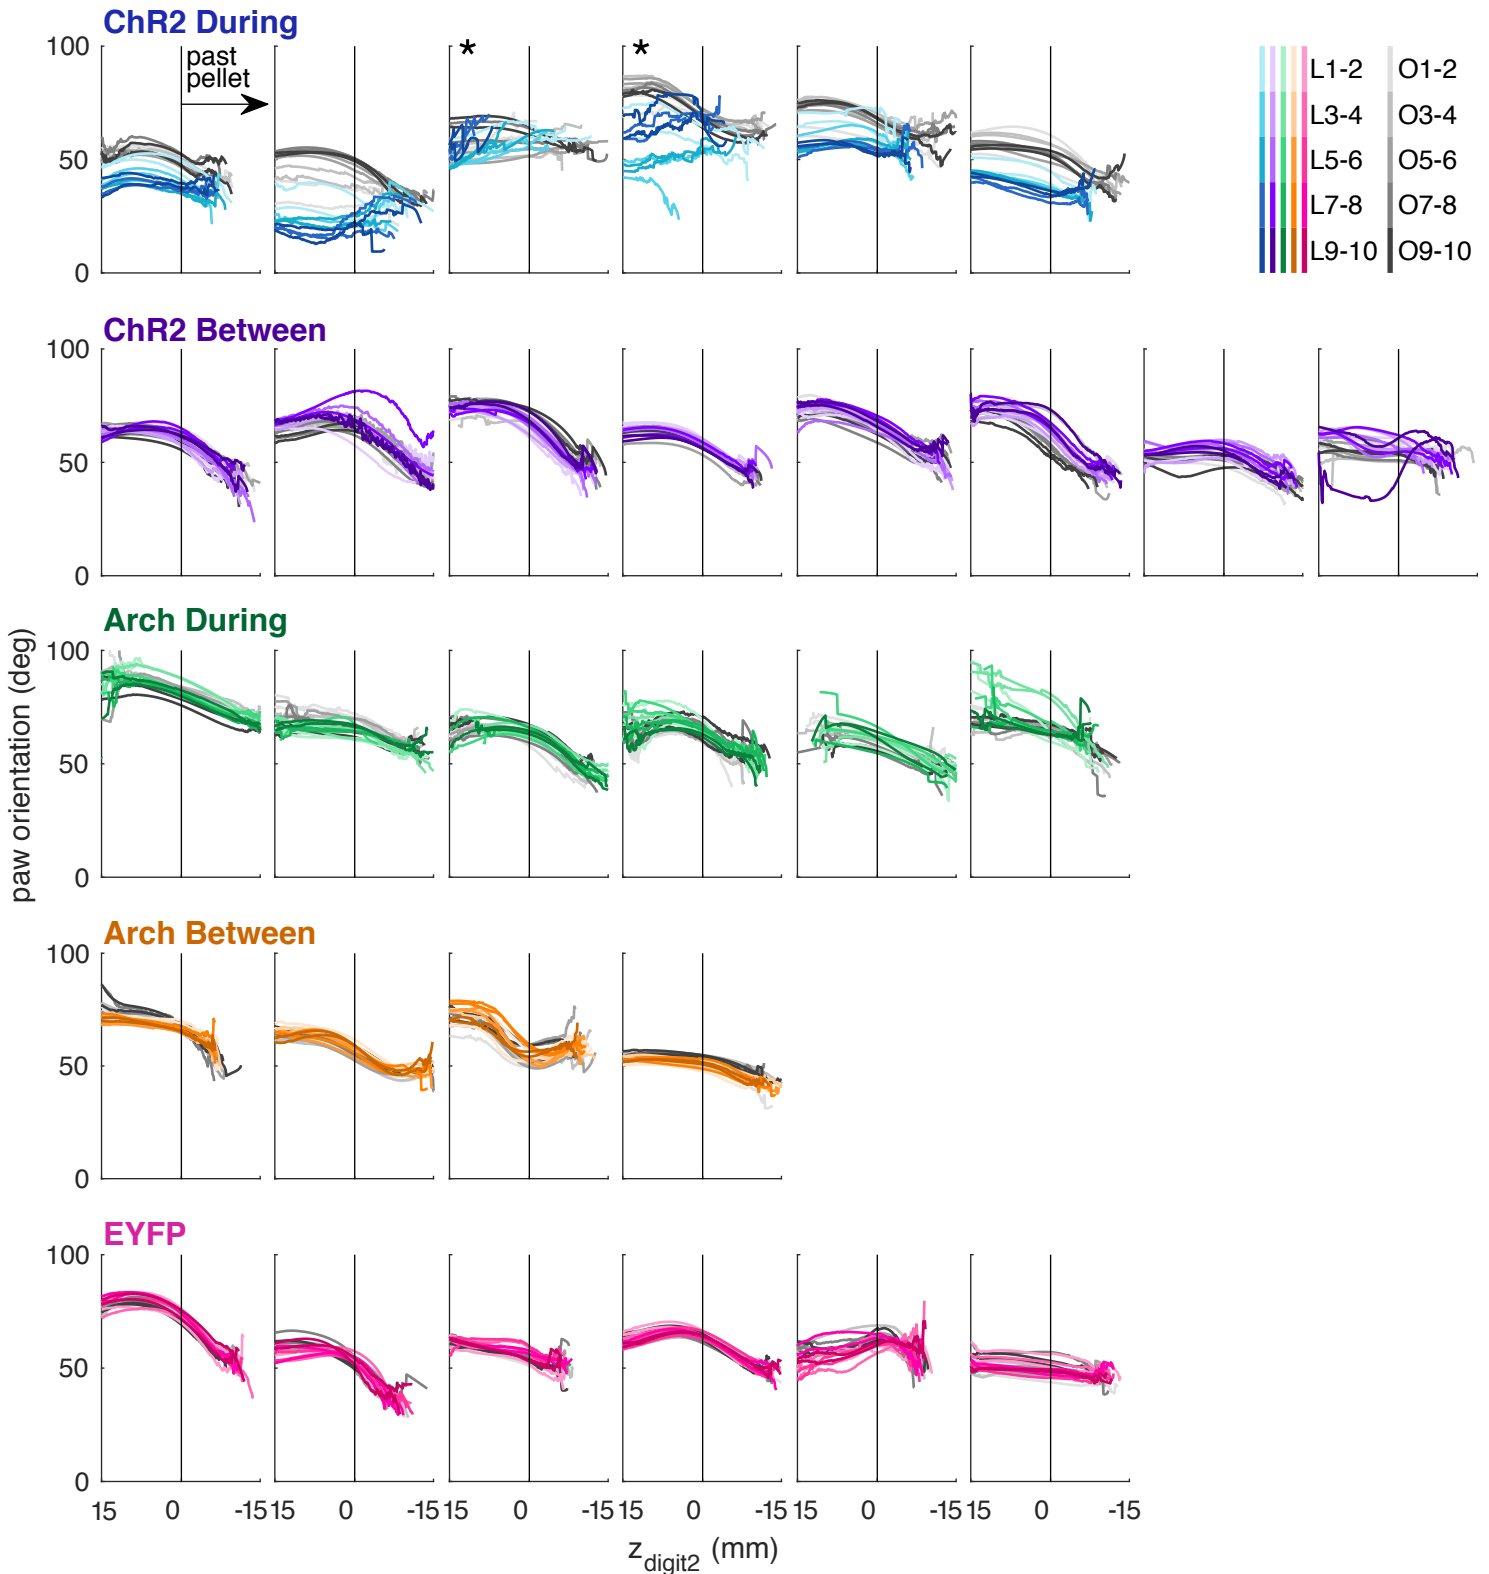

**Figure 9 – figure supplement 4.** Mean paw orientation as a function of paw advancement for each rat. From top to bottom: ChR2 during reach stimulation, ChR2 between reach stimulation, Arch during reach inhibition, Arch between reach inhibition, and EYFP during reach stimulation. \* indicates rats that were excluded from averaged data in Figure 9E (see Methods). In the legend, L1-2, O1-2, ... indicate laser on sessions 1-2, occlusion sessions 1-2, etc.
